# Supplementary material
Source: MDPI journal article supplement (https://www.mdpi.com/2311-7524/9/7/818)
Supplement: s1 [file s1 › Table S1.xlsx]

## Sheet: Sheet1
Table S1 The 1024 known metabolites identified from all pear samples
name	Ion mode	Q1 (Da)	Q3 (Da)	Molecular Weight (Da)	Formula	Ionization model	HQ-1	HQ-2	HQ-3	G-1	G-2	G-3	DN-1	DN-2	DN-3	DS-1	DS-2	DS-3	Molecular Weight (Da)	Formula	Ionization model	Compounds	Class I	Class II
HJKP000649	Positive	136.07	91.05	135.068	C8H9NO	[M+H]+	14043	13363	40070	21730	17233	19397	12136	6278.4	14031	9303.7	9066.5	12357	135.068	C8H9NO	[M+H]+	N-benzylformamide	Alkaloids	Alkaloids
Hmmp001310	Positive	188.07	118.07	187.063	C11H9NO2	[M+H]+	2156100	1587100	1959300	2273400	1565100	2229300	1639200	1807600	1262700	1198200	1697700	1444700	187.063	C11H9NO2	[M+H]+	3-Indoleacrylic acid	Alkaloids	Plumerane
Lmgp000796	Positive	150.06	61.01	149.048	C8H7NO2	[M+H]+	8599800	8726500	9642100	9213400	8336100	11207000	4651300	9235400	6852400	4892500	3922100	5070700	149.048	C8H7NO2	[M+H]+	4-Hydroxymandelonitrile	Alkaloids	Phenolamine
Lmhp005550	Positive	441.2	177.05	440.195	C24H28N2O6	[M+H]+	9	9	7053.6	5117.2	9	9	9	9	9	9	9	9	440.195	C24H28N2O6	[M+H]+	N,N'-Diferuloylputrescine	Alkaloids	Phenolamine
Lmhp005784	Positive	425.21	177.05	424.2	C24H28N2O5	[M+H]+	9	9	6939.8	9168.6	9	9	9	9	9	9	9	9	424.2	C24H28N2O5	[M+H]+	p-Coumaroylferuloylcadaverine	Alkaloids	Phenolamine
Lmlp004754	Positive	312.11	294.21	311.1	C14H17NO7	[M+H]+	6106.7	6372.9	10522	8840.8	2928.1	12510	4395.2	2614.8	8708.9	13202	14648	16538	311.1	C14H17NO7	[M+H]+	Ehretioside B	Alkaloids	Phenolamine
Lmrn003201	Negative	204.07	158.06	205.074	C11H11NO3	[M-H]-	9	9	17537	14882	9	9	11371	6904.2	11253	9	9	9	205.074	C11H11NO3	[M-H]-	Indole-3-lactic acid	Alkaloids	Plumerane
Lmxn006423	Negative	150	122.01	151.009	C7H5NOS	[M-H]-	9	3436.7	10499	8345.8	7357.4	6351.2	6562	9	11353	17406	5602	7748.4	151.009	C7H5NOS	[M-H]-	2(3H)-Benzothiazolone	Alkaloids	Alkaloids
mws0018	Positive	203.22	83	202.216	C10H26N4	[M+H]+	5531900	5703300	5473300	7114100	5620800	7607600	4881600	5534600	6321300	7523900	8930300	8712900	202.216	C10H26N4	[M+H]+	Spermine	Alkaloids	Alkaloids
mws0102	Negative	160.04	116	161.048	C9H7NO2	[M-H]-	9	9	20488	8962.5	9	15786	9	9248	9	21617	19742	24877	161.048	C9H7NO2	[M-H]-	Indole-5-carboxylic acid*	Alkaloids	Plumerane
mws0103	Positive	146.06	91	145.053	C9H7NO	[M+H]+	9	9	13340	10693	6415.3	23971	7496.2	4204.8	16429	9734.5	11848	18420	145.053	C9H7NO	[M+H]+	Indole-3-carboxaldehyde	Alkaloids	Plumerane
mws0146	Positive	138.06	78	137.048	C7H7NO2	[M+H]+	208130	191650	195500	132520	121890	85032	32878	122820	54493	557230	291410	318790	137.048	C7H7NO2	[M+H]+	Nicotinic Acid Methyl Ester(Methyl Nicotinate)	Alkaloids	Pyridine alkaloids
mws0191	Positive	118.09	59	117.079	C5H11NO2	[M+H]+	515080	465440	521450	644660	519480	772260	421320	517330	498540	465820	441780	573380	117.079	C5H11NO2	[M+H]+	Betaine	Alkaloids	Alkaloids
mws0491	Positive	122.1	105	121.089	C8H11N	[M+H]+	9	9	1598700	1066000	9	9	9	9	168800	9	9	139360	121.089	C8H11N	[M+H]+	2-Phenylethylamine	Alkaloids	Benzylphenylethylamine alkaloids
mws0620	Positive	175.12	144	174.116	C11H14N2	[M+H]+	9	9	9	24845	9	9	9	9	9	9	9	9	174.116	C11H14N2	[M+H]+	N-Methyltryptamine	Alkaloids	Plumerane
mws0677	Positive	219.11	160	218.106	C12H14N2O2	[M+H]+	15766	6396	26282	22858	8330.2	18739	16482	6819.8	6976	9872.5	6219.5	8600	218.106	C12H14N2O2	[M+H]+	N-Acetyl-5-hydroxytryptamine	Alkaloids	Plumerane
mws0704	Negative	140.01	78.96	141.019	C2H8NO4P	[M-H]-	60168	91139	76000	65640	87853	90024	88229	95924	96874	70361	66207	62790	141.019	C2H8NO4P	[M-H]-	O-Phosphorylethanolamine	Alkaloids	Alkaloids
mws0982	Positive	126.1	68	125.095	C6H11N3	[M+H]+	3217.7	1863.1	3407	3016.4	2403.9	2272.4	6794.2	3385.5	1929.4	3981	2556.3	3498.9	125.095	C6H11N3	[M+H]+	1-Methylhistamine	Alkaloids	Alkaloids
mws0983	Positive	326.31	62.06	325.298	C20H39NO2	[M+H]+	286600	247360	201410	28969	31946	25181	60394	52889	38402	100430	98389	169980	325.298	C20H39NO2	[M+H]+	N-Oleoylethanolamine	Alkaloids	Alkaloids
mws1346	Positive	162.08	98	161.069	C6H11NO4	[M+H]+	153040	231220	169160	265340	465210	165420	283750	390470	224610	333230	435560	401930	161.069	C6H11NO4	[M+H]+	DL-2-Aminoadipic acid	Alkaloids	Alkaloids
mws1383	Positive	243.09	145	242.08	C12H10N4O2	[M+H]+	2877.2	7054.8	4167.8	2916.2	7047.2	6989.5	4687.8	9309.5	2333	4734.2	6029.2	3624	242.08	C12H10N4O2	[M+H]+	Lumichrome	Alkaloids	Alkaloids
mws1417	Negative	160.04	116	161.048	C9H7NO2	[M-H]-	17872	7491.2	17519	10255	6396.5	26642	9	13559	12828	37529	35552	35398	161.048	C9H7NO2	[M-H]-	Indole-3-carboxylic acid*	Alkaloids	Plumerane
mws1433	Positive	314.14	177.05	313.131	C18H19NO4	[M+H]+	9	9	72573	7092.5	9	9	9	9	9	9	9	9	313.131	C18H19NO4	[M+H]+	N-Feruloyltyramine	Alkaloids	Phenolamine
MWS2076	Positive	110.06	65.04	109.053	C6H7NO	[M+H]+	9	9	44589	64677	9	9	9	9	9	9	9	9	109.053	C6H7NO	[M+H]+	2-Aminophenol	Alkaloids	Phenolamine
mws2218	Positive	195.09	83.06	194.08	C8H10N4O2	[M+H]+	9	9	8301.8	18988	9	9	9	9	9	9	9	9	194.08	C8H10N4O2	[M+H]+	Caffeine	Alkaloids	Alkaloids
MWS3020	Positive	145.13	86.1	144.126	C7H16N2O	[M+H]+	132400	116900	146950	159000	140170	168850	103220	113230	124910	150050	197720	195680	144.126	C7H16N2O	[M+H]+	N-Acetylcadaverine	Alkaloids	Alkaloids
MWS3270	Negative	166.02	79.96	167.022	C7H5NO4	[M-H]-	11890	5407	23734	7350.2	5382.2	10945	8889.5	4058	12227	10459	15500	11330	167.022	C7H5NO4	[M-H]-	Quinolinic Acid	Alkaloids	Pyridine alkaloids
MWStz070	Positive	182.08	91.05	181.074	C9H11NO3	[M+H]+	501540	453130	1279600	563980	391010	643910	353350	289770	404570	336180	366550	274840	181.074	C9H11NO3	[M+H]+	N-(2-Hydroxy-4-methoxyphenyl)acetamide	Alkaloids	Phenolamine
pma0702	Positive	558.28	207.07	557.274	C29H39N3O8	[M+H]+	18072	15586	25426	36119	39390	52566	28733	23022	32833	24630	24531	26226	557.274	C29H39N3O8	[M+H]+	N1,N8-Bis(sinapoyl)spermidine	Alkaloids	Phenolamine
pma2987	Positive	142.1	124.09	141.09	C6H11N3O	[M+H]+	5019100	4722000	5107400	6026100	5582200	6267100	4503300	5074500	5540500	6749900	7808300	7751800	141.09	C6H11N3O	[M+H]+	Histidinol	Alkaloids	Alkaloids
pma3649	Positive	132.1	86.1	131.058	C5H9NO3	[M+H]+	207700	254190	257510	174780	156170	290090	160590	227210	172820	170300	128120	205060	131.058	C5H9NO3	[M+H]+	5-Aminolevulinic Acid	Alkaloids	Alkaloids
pmb0484	Positive	104.1	60.1	103.091	C5H13NO	[M+H]+	7290600	7429600	9786400	7319400	6628800	10662000	6431800	6226700	8422200	7880500	7667100	8046400	103.091	C5H13NO	[M+H]+	Choline	Alkaloids	Alkaloids
pmb0492	Positive	584.28	325	583.268	C34H37N3O6	[M+H]+	9	5333.8	28460	13048	8298	7126	8294.5	12455	1785.2	4155.8	3528.5	3563	583.268	C34H37N3O6	[M+H]+	N',N'',N'''-p-Coumaroyl-cinnamoyl-caffeoyl spermidine	Alkaloids	Phenolamine
pmb0501	Positive	131.13	114.1	130.122	C5H14N4	[M+H]+	4424.8	9	6129.4	9	9	2060.8	9	1693.7	9	5466.6	3668.4	10884	130.122	C5H14N4	[M+H]+	Agmatine	Alkaloids	Alkaloids
pmb0782	Positive	86.1	69.2	85.089	C5H11N	[M+H]+	6741900	5582700	5943300	7218200	4796300	6650700	4379700	4618800	4707900	3941800	3845600	4404900	85.089	C5H11N	[M+H]+	Piperidine	Alkaloids	Piperidine alkaloids
pmb0818	Positive	206.1	147.5	205.074	C11H11NO3	[M+H]+	185410	146380	162150	202730	105880	202120	154130	183640	136420	87017	159420	124910	205.074	C11H11NO3	[M+H]+	Methoxyindoleacetic acid	Alkaloids	Plumerane
pmb0819	Positive	157	130	156.069	C10H8N2	[M+H]+	79276	59452	82563	90038	64575	69364	56211	79908	57002	51384	52856	53206	156.069	C10H8N2	[M+H]+	3-Indoleacetonitrile	Alkaloids	Plumerane
pmb1096	Positive	118.07	91	117.058	C8H7N	[M+H]+	28340	19334	40410	16848	13572	15680	15579	6616.2	20030	16777	33037	29152	117.058	C8H7N	[M+H]+	Indole	Alkaloids	Plumerane
pmb1754	Positive	184	125	184.073	C5H15NO4P+	[M]+	219070	233460	225190	254630	234860	276790	221520	247690	283730	352780	339190	363430	184.073	C5H15NO4P+	[M]+	O-Phosphocholine	Alkaloids	Alkaloids
pme1137	Positive	140.03	94	139.027	C6H5NO3	[M+H]+	89954	84534	89060	61430	53221	60993	41423	61393	57844	47869	18733	36982	139.027	C6H5NO3	[M+H]+	6-Hydroxynicotinic acid	Alkaloids	Pyridine alkaloids
pme2268	Positive	138.06	94.07	137.048	C7H7NO2	[M+H]+	128400	66022	751600	320480	33560	314350	40012	49031	102560	1090700	1305000	1620000	137.048	C7H7NO2	[M+H]+	Trigonelline	Alkaloids	Pyridine alkaloids
pme2433	Positive	106.09	88	105.079	C4H11NO2	[M+H]+	43412	53948	42347	61854	70509	76851	45713	87246	87080	70507	55844	90885	105.079	C4H11NO2	[M+H]+	Diethanolamine	Alkaloids	Alkaloids
Zmzp005934	Positive	284.3	102.09	283.288	C18H37NO	[M+H]+	37619	53309	74535	47857	46832	35405	48140	55182	58730	45558	35857	33380	283.288	C18H37NO	[M+H]+	Stearamide	Alkaloids	Alkaloids
Hmsp000364	Positive	144.1	98.09	143.095	C7H13NO2	[M+H]+	112590	122590	94079	99308	86178	149350	50937	83870	116810	106010	130720	113190	143.095	C7H13NO2	[M+H]+	L-Cyclopentylglycine	Amino acids and derivatives	Amino acids and derivatives
Lmbn000121	Negative	113.04	96.01	114.043	C4H6N2O2	[M-H]-	18928	25110	13348	16840	16591	7112.8	15813	10079	10962	10265	7671.8	15826	114.043	C4H6N2O2	[M-H]-	3-Cyano-L-alanine	Amino acids and derivatives	Amino acids and derivatives
Lmbp000123	Positive	164.07	56.05	163.067	C6H13NO2S	[M+H]+	31085	9407.7	18529	115800	40838	224110	55899	171630	142870	108780	102960	112800	163.067	C6H13NO2S	[M+H]+	L-Homomethionine	Amino acids and derivatives	Amino acids and derivatives
Lmhp001461	Positive	229.15	70.07	228.147	C11H20N2O3	[M+H]+	184890	354240	488360	280040	123860	200330	170720	122250	159580	231520	106830	224460	228.147	C11H20N2O3	[M+H]+	L-Prolyl-L-Leucine	Amino acids and derivatives	Amino acids and derivatives
Lmhp001670	Positive	231.16	72.08	230.163	C11H22N2O3	[M+H]+	291490	437400	871190	420340	243250	245260	208830	161930	173500	241060	172790	241180	230.163	C11H22N2O3	[M+H]+	L-Valyl-L-Leucine	Amino acids and derivatives	Amino acids and derivatives
Lmhp002001	Positive	265.15	72.08	264.147	C14H20N2O3	[M+H]+	128010	171710	285760	147330	73172	111980	105960	55941	74068	127050	78900	75183	264.147	C14H20N2O3	[M+H]+	L-Valyl-L-Phenylalanine	Amino acids and derivatives	Amino acids and derivatives
Lmhp002031	Positive	245.18	86.1	244.179	C12H24N2O3	[M+H]+	320160	454730	947360	420240	290050	392520	356340	206430	266310	330850	238040	232100	244.179	C12H24N2O3	[M+H]+	L-Leucyl-L-Leucine	Amino acids and derivatives	Amino acids and derivatives
Lmqp000427	Positive	146.08	82.07	145.074	C6H11NO3	[M+H]+	660320	588290	476680	532080	672120	1047900	272240	386910	488490	605560	561870	532960	145.074	C6H11NO3	[M+H]+	N-Methyl-Trans-4-Hydroxy-L-Proline	Amino acids and derivatives	Amino acids and derivatives
ML10181668	Positive	130.09	84.08	129.079	C6H11NO2	[M+H]+	4465400	3493500	5116300	3094600	3085400	3401500	2204700	1641300	2044400	1730100	1327500	2389900	129.079	C6H11NO2	[M+H]+	Cycloleucine	Amino acids and derivatives	Amino acids and derivatives
ML10198895	Negative	88.04	88.04	89.048	C3H7NO2	[M-H]-	17917	11930	17122	20960	22750	9661.5	9948.8	14896	11530	8170.8	7487.8	15955	89.048	C3H7NO2	[M-H]-	N-Methylglycine	Amino acids and derivatives	Amino acids and derivatives
mws0193	Positive	190.12	127	189.111	C7H15N3O3	[M+H]+	30468	32586	39753	26887	34877	44388	19997	22917	16240	17728	33975	38026	189.111	C7H15N3O3	[M+H]+	L-Homocitrulline	Amino acids and derivatives	Amino acids and derivatives
mws0219	Negative	132.03	88	133.038	C4H7NO4	[M-H]-	989760	1065200	1273700	1620100	1651500	534600	658860	1045000	728530	860360	626870	1004000	133.038	C4H7NO4	[M-H]-	L-Aspartic Acid	Amino acids and derivatives	Amino acids and derivatives
mws0224	Positive	150.1	61	149.051	C5H11NO2S	[M+H]+	6740100	6243300	6818200	5642000	5676300	8696800	2922100	6359300	4287700	3362300	3080800	3911000	149.051	C5H11NO2S	[M+H]+	DL-Methionine	Amino acids and derivatives	Amino acids and derivatives
mws0227	Positive	132.1	86.2	131.095	C6H13NO2	[M+H]+	1856900	1597900	1645800	2047200	1371000	1977300	1349200	1464400	1384700	1163300	1103400	1267900	131.095	C6H13NO2	[M+H]+	L-Leucine*	Amino acids and derivatives	Amino acids and derivatives
mws0230	Positive	120.07	74	119.058	C4H9NO3	[M+H]+	953260	834390	950950	889070	800970	1298200	579890	668790	785280	625390	496460	635650	119.058	C4H9NO3	[M+H]+	L-Threonine	Amino acids and derivatives	Amino acids and derivatives
mws0250	Positive	182.08	136.1	181.074	C9H11NO3	[M+H]+	554260	466050	1373100	593790	459580	777870	402790	299520	452880	402620	357280	358360	181.074	C9H11NO3	[M+H]+	L-Tyrosine	Amino acids and derivatives	Amino acids and derivatives
mws0254	Positive	156.08	110	155.069	C6H9N3O2	[M+H]+	814190	835970	1149300	844500	603920	649280	627540	987050	519450	420310	353860	588020	155.069	C6H9N3O2	[M+H]+	L-Histidine	Amino acids and derivatives	Amino acids and derivatives
mws0256	Positive	118.09	72.1	117.079	C5H11NO2	[M+H]+	23762000	21210000	20400000	25935000	19245000	28732000	17639000	20451000	19449000	17223000	14535000	17522000	117.079	C5H11NO2	[M+H]+	L-Valine	Amino acids and derivatives	Amino acids and derivatives
mws0258	Positive	132.1	86	131.095	C6H13NO2	[M+H]+	1829700	1480200	1583600	1944600	1353400	1913100	1295300	1409600	1270800	1096000	1008000	1212900	131.095	C6H13NO2	[M+H]+	L-Isoleucine*	Amino acids and derivatives	Amino acids and derivatives
mws0260	Positive	175.12	116	174.112	C6H14N4O2	[M+H]+	684020	750420	1625700	1225400	452890	787630	500780	587770	696890	605060	632460	829650	174.112	C6H14N4O2	[M+H]+	L-Arginine	Amino acids and derivatives	Amino acids and derivatives
mws0282	Negative	203.08	116.05	204.09	C11H12N2O2	[M-H]-	9870500	7986000	8516000	10664000	7253900	9975400	7039500	9368300	6676200	6720600	8612400	7241200	204.09	C11H12N2O2	[M-H]-	L-Tryptophan	Amino acids and derivatives	Amino acids and derivatives
mws0582	Positive	322.11	130	321.099	C11H19N3O6S	[M+H]+	27259	31589	47602	24049	20625	15755	20613	19804	27942	13258	15478	8647.8	321.099	C11H19N3O6S	[M+H]+	S-(Methyl)glutathione	Amino acids and derivatives	Amino acids and derivatives
mws0629	Positive	281.11	166	280.106	C13H16N2O5	[M+H]+	32351	23820	35388	51148	37409	48722	43629	39612	46839	55616	42742	63413	280.106	C13H16N2O5	[M+H]+	L-Aspartyl-L-Phenylalanine	Amino acids and derivatives	Amino acids and derivatives
mws0636	Positive	313.15	166	312.147	C18H20N2O3	[M+H]+	7492.8	16545	27232	8228.5	5768.5	14034	9058	9	5747.8	11540	8130	5708.8	312.147	C18H20N2O3	[M+H]+	L-Phenylalanyl-L-phenylalanine	Amino acids and derivatives	Amino acids and derivatives
mws0671	Positive	120.07	74.1	119.058	C4H9NO3	[M+H]+	932080	1035700	1054000	832310	858210	1248400	483950	744390	745390	646390	544400	658470	119.058	C4H9NO3	[M+H]+	L-Homoserine	Amino acids and derivatives	Amino acids and derivatives
mws0712	Negative	130.05	86	131.058	C5H9NO3	[M-H]-	80224	57946	79429	47443	38372	46957	27850	37209	23723	38874	32381	20987	131.058	C5H9NO3	[M-H]-	N-Propionylglycine	Amino acids and derivatives	Amino acids and derivatives
mws0736	Positive	189.12	86	188.116	C8H16N2O3	[M+H]+	57024	80566	123310	52592	35130	59312	39050	26115	25018	39920	21903	9	188.116	C8H16N2O3	[M+H]+	N-Glycyl-L-leucine*	Amino acids and derivatives	Amino acids and derivatives
MWS0933	Positive	170.09	124.09	169.085	C7H11N3O2	[M+H]+	70810	42586	82591	102690	87071	119220	52159	71605	71328	79556	55044	99305	169.085	C7H11N3O2	[M+H]+	1-Methylhistidine*	Amino acids and derivatives	Amino acids and derivatives
MWS0994	Negative	351.08	164.03	352.087	C10H16N4O10	[M-H]-	11115	6033.2	6580.8	6529.8	14125	7740	9485.2	3468.5	7513.2	11644	8605.5	13837	352.087	C10H16N4O10	[M-H]-	N-Carbamoyl-L-aspartate	Amino acids and derivatives	Amino acids and derivatives
mws1050	Positive	148.06	88	147.053	C5H9NO4	[M+H]+	65382	100300	147000	57505	107060	35443	47091	50598	33602	49154	46570	57642	147.053	C5H9NO4	[M+H]+	O-Acetylserine	Amino acids and derivatives	Amino acids and derivatives
mws1587	Positive	132.1	86	131.095	C6H13NO2	[M+H]+	1837200	1516600	1568100	1945700	1407500	1888300	1280000	1385100	1331300	1160800	1099100	1193100	131.095	C6H13NO2	[M+H]+	L-Norleucine*	Amino acids and derivatives	Amino acids and derivatives
MWS1771	Positive	196.1	91.05	195.09	C10H13NO3	[M+H]+	10769	21100	26431	9015	9	6068	8124.9	12222	9	9	9	9	195.09	C10H13NO3	[M+H]+	L-Tyrosine methyl ester	Amino acids and derivatives	Amino acids and derivatives
MWS2426	Negative	332.13	203.08	333.132	C16H19N3O5	[M-H]-	11473	24170	47196	11764	7563.4	6309.5	8287.7	5071.1	12202	5998.9	8655.3	9053.2	333.132	C16H19N3O5	[M-H]-	Tryptophan glutamic acid	Amino acids and derivatives	Amino acids and derivatives
mws4134	Negative	611.14	306.08	612.152	C20H32N6O12S2	[M-H]-	6271	5064.9	94469	55128	40239	13290	15745	75886	15923	9474.5	16306	21129	612.152	C20H32N6O12S2	[M-H]-	Oxiglutatione	Amino acids and derivatives	Amino acids and derivatives
MWS4296	Positive	223.11	120.08	222.1	C11H14N2O3	[M+H]+	280520	470840	992010	496140	275970	391670	298850	190990	302930	327630	267100	297520	222.1	C11H14N2O3	[M+H]+	Glycylphenylalanine	Amino acids and derivatives	Amino acids and derivatives
MWS4309	Positive	262.12	188.07	261.111	C13H15N3O3	[M+H]+	8210.8	8197.2	4137	7552.8	4770.5	9967	6951.2	8694.5	5856	5890	9939.5	12185	261.111	C13H15N3O3	[M+H]+	Glycyl-tryptophan	Amino acids and derivatives	Amino acids and derivatives
MWS4471	Negative	173.06	58.03	174.064	C6H10N2O4	[M-H]-	30982	24408	32527	27403	16969	25665	27661	30062	39446	29483	26397	31948	174.064	C6H10N2O4	[M-H]-	N-Alpha-Acetyl-L-Asparagine	Amino acids and derivatives	Amino acids and derivatives
mws5041	Positive	189.12	86.1	188.116	C8H16N2O3	[M+H]+	57415	57777	97641	54652	22872	41644	31084	20608	32350	40084	9	9	188.116	C8H16N2O3	[M+H]+	L-Glycyl-L-isoleucine*	Amino acids and derivatives	Amino acids and derivatives
MWSmce190	Positive	148.09	74.02	147.09	C6H13NO3	[M+H]+	60186	96332	49104	59375	65916	84584	57478	54636	69453	63288	93684	58520	147.09	C6H13NO3	[M+H]+	(2S,3R,4S)-4-Hydroxyisoleucine*	Amino acids and derivatives	Amino acids and derivatives
MWSmce585	Positive	104.07	59.01	103.063	C4H9NO2	[M+H]+	734930	612610	1000500	681580	670690	1138200	620020	529130	875990	758630	622160	902000	103.063	C4H9NO2	[M+H]+	Methyl 3-aminopropanoate	Amino acids and derivatives	Amino acids and derivatives
MWSmce608	Positive	148.1	74.02	147.09	C6H13NO3	[M+H]+	69676	75712	67636	52116	68503	124570	77774	62382	63791	61506	52918	76542	147.09	C6H13NO3	[M+H]+	4-Hydoxy-L-Isoleucine*	Amino acids and derivatives	Amino acids and derivatives
MWSslk140	Positive	192.07	56.05	191.062	C7H13NO3S	[M+H]+	28967	40975	49881	53611	48306	117900	76454	54380	76025	59280	38797	37297	191.062	C7H13NO3S	[M+H]+	N-Acetyl-L-Methionine	Amino acids and derivatives	Amino acids and derivatives
NK10251888	Positive	203.15	70.07	202.143	C8H18N4O2	[M+H]+	143150	124690	180950	233260	155510	414840	156030	229080	286060	204330	183130	226760	202.143	C8H18N4O2	[M+H]+	NG,NG-Dimethyl-L-arginine	Amino acids and derivatives	Amino acids and derivatives
pmb0034	Positive	277.1	114.7	276.096	C10H16N2O7	[M+H]+	9	9	188540	131440	9	9	9	9	6989.1	9	9	13163	276.096	C10H16N2O7	[M+H]+	L-α-Glutamyl-L-Glutamic Acid	Amino acids and derivatives	Amino acids and derivatives
pmb0464	Positive	458.1	116.3	457.143	C16H27NO14	[M+H]+	1627600	1327600	1481500	1191400	1899600	853370	1507400	1538700	1508400	586010	626880	642480	457.143	C16H27NO14	[M+H]+	L-Aspartic acid-O-diglucoside	Amino acids and derivatives	Amino acids and derivatives
pmb0962	Positive	235.1	118.3	234.158	C10H22N2O4	[M+H]+	236360	119520	131410	173690	86332	223450	40798	102170	47672	50080	37068	81664	234.158	C10H22N2O4	[M+H]+	L-Lysine-Butanoic Acid	Amino acids and derivatives	Amino acids and derivatives
pmb2591	Negative	245.09	203.2	246.1	C13H14N2O3	[M-H]-	9	9	4834.5	7227	9	9	9	9	4035	22792	25650	39462	246.1	C13H14N2O3	[M-H]-	N-Acetyl-L-Tryptophan	Amino acids and derivatives	Amino acids and derivatives
pmb2855	Negative	307	145	308.122	C11H20N2O8	[M-H]-	18211	20563	409300	101830	12464	19072	9	9627.9	13578	15872	19416	9	308.122	C11H20N2O8	[M-H]-	L-Glutamine-O-glycoside	Amino acids and derivatives	Amino acids and derivatives
pmb2857	Negative	308.1	146.1	309.106	C11H19NO9	[M-H]-	15557	17054	128510	67704	33977	10902	17297	27845	12950	16442	28061	21116	309.106	C11H19NO9	[M-H]-	L-Glutamic acid-O-glycoside	Amino acids and derivatives	Amino acids and derivatives
pme0006	Positive	116.07	70.1	115.063	C5H9NO2	[M+H]+	22452000	13253000	17602000	12100000	16522000	25493000	15267000	20186000	28772000	10944000	15599000	15234000	115.063	C5H9NO2	[M+H]+	L-Proline	Amino acids and derivatives	Amino acids and derivatives
pme0008	Positive	176.1	113	175.096	C6H13N3O3	[M+H]+	221150	263310	262890	188780	163900	175260	182740	135680	220720	206960	199470	222480	175.096	C6H13N3O3	[M+H]+	L-Citrulline	Amino acids and derivatives	Amino acids and derivatives
pme0010	Positive	106	60	105.043	C3H7NO3	[M+H]+	626520	591510	717080	979680	1098400	1230600	712410	1277400	1063300	1101400	1076500	1285800	105.043	C3H7NO3	[M+H]+	L-Serine	Amino acids and derivatives	Amino acids and derivatives
pme0014	Positive	148.06	84	147.053	C5H9NO4	[M+H]+	5249600	5739200	7566100	7154300	13303000	8069000	6891400	8279000	7287200	9946300	10310000	11324000	147.053	C5H9NO4	[M+H]+	L-Glutamic acid	Amino acids and derivatives	Amino acids and derivatives
pme0021	Positive	166.09	120.08	165.07	C9H11NO2	[M+H]+	6820700	5787200	8394200	5670800	3366500	6569000	4598700	6690400	4231600	2559000	2355800	3122900	165.07	C9H11NO2	[M+H]+	L-Phenylalanine	Amino acids and derivatives	Amino acids and derivatives
pme0026	Positive	147.11	84	146.106	C6H14N2O2	[M+H]+	658660	776840	1078900	1107200	1126100	853940	1046300	1051400	769060	550820	496340	477030	146.106	C6H14N2O2	[M+H]+	L-Lysine	Amino acids and derivatives	Amino acids and derivatives
pme0075	Negative	188.06	128	189.064	C7H11NO5	[M-H]-	30359	29906	143380	78540	45315	41026	23851	28234	26479	46886	66956	45098	189.064	C7H11NO5	[M-H]-	N-Acetyl-L-glutamic acid	Amino acids and derivatives	Amino acids and derivatives
pme0122	Positive	189.12	126	188.116	C8H16N2O3	[M+H]+	84518	99023	116990	74260	78157	109130	64813	56437	52418	61312	59656	68479	188.116	C8H16N2O3	[M+H]+	N6-Acetyl-L-lysine	Amino acids and derivatives	Amino acids and derivatives
pme0137	Negative	187.07	125	188.08	C7H12N2O4	[M-H]-	1202100	831380	924710	1396100	1419900	1009700	1025900	922030	860630	994820	1083900	1004000	188.08	C7H12N2O4	[M-H]-	N-Acetyl-L-Glutamine	Amino acids and derivatives	Amino acids and derivatives
pme0170	Positive	217.13	158	216.122	C8H16N4O3	[M+H]+	9	8759.5	22647	6726.5	9	10544	8507.6	11524	9576.2	13342	7796.4	6334	216.122	C8H16N4O3	[M+H]+	N-Acetyl-L-Arginine	Amino acids and derivatives	Amino acids and derivatives
pme0181	Positive	170.09	124	169.085	C7H11N3O2	[M+H]+	118090	91315	109730	163600	146810	191890	95203	215890	144320	138760	93386	124070	169.085	C7H11N3O2	[M+H]+	3-Methyl-L-Histidine*	Amino acids and derivatives	Amino acids and derivatives
pme0193	Positive	147.08	84	146.069	C5H10N2O3	[M+H]+	637730	783910	1090200	1081700	1109000	864430	1049600	991860	797880	529800	508410	487540	146.069	C5H10N2O3	[M+H]+	L-Glutamine	Amino acids and derivatives	Amino acids and derivatives
pme0195	Negative	120.02	62	121.02	C3H7NO2S	[M-H]-	29605	30058	27106	19742	22088	41096	38034	34439	41782	28085	24596	30879	121.02	C3H7NO2S	[M-H]-	L-Cysteine	Amino acids and derivatives	Amino acids and derivatives
pme1086	Negative	306.08	143	307.084	C10H17N3O6S	[M-H]-	12624	77305	93668	20002	69610	3713.2	10197	227910	12844	9	9	9	307.084	C10H17N3O6S	[M-H]-	Glutathione reduced form	Amino acids and derivatives	Amino acids and derivatives
pme1210	Positive	150.06	61	149.051	C5H11NO2S	[M+H]+	6185500	6350800	7991100	7450200	6105300	8725500	3662700	6867000	5347100	3867400	3162700	3644200	149.051	C5H11NO2S	[M+H]+	L-Methionine	Amino acids and derivatives	Amino acids and derivatives
pme1419	Positive	164.07	104	163.067	C6H13NO2S	[M+H]+	20926	22186	17673	17288	14648	17813	8693.5	24939	7319.2	9	9	9	163.067	C6H13NO2S	[M+H]+	L-Methionine methyl ester	Amino acids and derivatives	Amino acids and derivatives
pme2074	Negative	322.4	129.7	323.21	C18H29NO4	[M-H]-	9	9	9	9	9	9	9	9	9	37660	38545	34622	323.21	C18H29NO4	[M-H]-	Jasmonoyl-L-Isoleucine	Amino acids and derivatives	Amino acids and derivatives
pme2559	Negative	174.04	88	175.048	C6H9NO5	[M-H]-	81784	51984	48029	110280	139420	98152	62456	110930	70824	119840	97761	113620	175.048	C6H9NO5	[M-H]-	N-Acetyl-L-Aspartic Acid	Amino acids and derivatives	Amino acids and derivatives
pme2617	Positive	166.05	102	165.046	C5H11NO3S	[M+H]+	772680	712060	667300	803300	736480	981610	568650	664380	704680	811680	897520	830920	165.046	C5H11NO3S	[M+H]+	L-Methionine Sulfoxide	Amino acids and derivatives	Amino acids and derivatives
pme2758	Negative	162.04	144	163.048	C5H9NO5	[M-H]-	42977	46058	60058	60526	57729	41047	34230	44729	32417	42909	25676	44109	163.048	C5H9NO5	[M-H]-	4-Hydroxy-L-glutamic acid	Amino acids and derivatives	Amino acids and derivatives
pme2914	Negative	161.05	99	162.053	C6H10O5	[M-H]-	3259100	2343800	2788300	4025800	3862900	1607600	3233700	5059200	4787100	6586400	8809600	7922500	162.053	C6H10O5	[M-H]-	3-Hydroxy-3-methylpentane-1,5-dioic acid	Amino acids and derivatives	Amino acids and derivatives
pme3033	Positive	104.07	86	103.063	C4H9NO2	[M+H]+	72839	98608	121100	84702	83009	131420	51023	75201	82049	93875	66158	85851	103.063	C4H9NO2	[M+H]+	N,N-Dimethylglycine	Amino acids and derivatives	Amino acids and derivatives
pme3351	Negative	144.1	126	145.074	C6H11NO3	[M-H]-	9	9	9	9	17494	10075	9	9	9	73624	75515	108510	145.074	C6H11NO3	[M-H]-	Allysine(6-Oxo DL-Norleucine)	Amino acids and derivatives	Amino acids and derivatives
pme3382	Negative	160.06	98	161.069	C6H11NO4	[M-H]-	68127	44107	73374	63534	81673	105740	49422	69007	46103	70747	59668	66987	161.069	C6H11NO4	[M-H]-	N-Acetyl-L-threonine	Amino acids and derivatives	Amino acids and derivatives
Zmdn001564	Negative	293.11	164.07	294.122	C14H18N2O5	[M-H]-	33110	25087	40155	25930	9294	15665	14126	25678	20190	16646	19722	25756	294.122	C14H18N2O5	[M-H]-	γ-Glutamylphenylalanine	Amino acids and derivatives	Amino acids and derivatives
Zmdp000292	Positive	189.14	70.07	188.127	C7H16N4O2	[M+H]+	89808	64912	154080	126230	77333	115210	49888	102370	85081	82449	91515	84956	188.127	C7H16N4O2	[M+H]+	Arginine methyl ester	Amino acids and derivatives	Amino acids and derivatives
Zmdp000972	Positive	136.04	91.05	135.035	C4H9NO2S	[M+H]+	16164	14835	34102	23124	8777.9	18370	11895	13275	11067	9692.6	8804.6	9819.4	135.035	C4H9NO2S	[M+H]+	S-Methyl-L-cysteine	Amino acids and derivatives	Amino acids and derivatives
Zmdp000976	Positive	208.06	119.02	207.057	C7H13NO4S	[M+H]+	9	9	9	6426.9	9	9	9	9	9	9	9	9	207.057	C7H13NO4S	[M+H]+	S-(2-Carboxypropyl)cysteine	Amino acids and derivatives	Amino acids and derivatives
Zmdp002216	Positive	261.14	86.1	260.137	C11H20N2O5	[M+H]+	42124	35779	23239	36871	33307	35379	11282	14842	27958	46034	5125.8	39667	260.137	C11H20N2O5	[M+H]+	L-γ-Glutamyl-L-leucine	Amino acids and derivatives	Amino acids and derivatives
Zmgn002106	Negative	206.08	58.03	207.09	C11H13NO3	[M-H]-	78756	45032	633190	448790	77862	177630	65720	78660	129540	179600	270720	226420	207.09	C11H13NO3	[M-H]-	N-Acetyl-L-phenylalanine	Amino acids and derivatives	Amino acids and derivatives
Zmjp000182	Positive	189.13	70.07	188.127	C7H16N4O2	[M+H]+	78668	71514	149560	116550	82752	135080	43238	96238	73295	79789	78926	105230	188.127	C7H16N4O2	[M+H]+	N-Monomethyl-L-arginine	Amino acids and derivatives	Amino acids and derivatives
Zmyn000155	Negative	173.11	131.08	174.1	C7H14N2O3	[M-H]-	23388	18756	165130	44664	18951	9	13097	14104	16006	9	9	23732	174.1	C7H14N2O3	[M-H]-	N-α-Acetyl-L-ornithine	Amino acids and derivatives	Amino acids and derivatives
Zmzn000113	Negative	146.05	102.06	147.053	C5H9NO4	[M-H]-	703880	967090	1091000	1109400	1707600	666140	753060	969230	679930	888890	925210	1111600	147.053	C5H9NO4	[M-H]-	L-threo-3-Methylaspartate	Amino acids and derivatives	Amino acids and derivatives
Zmzp000145	Positive	189.16	84.08	188.152	C9H20N2O2	[M+H]+	73364	69438	72448	202660	131940	185120	42120	121330	85981	104310	64717	81002	188.152	C9H20N2O2	[M+H]+	Trimethyllysine	Amino acids and derivatives	Amino acids and derivatives
HJAP005	Positive	495.11	333.07	494.105	C22H22O13	[M+H]+	9	9	10672	9	9	9	9	9	9	9	7751	5501.8	494.105	C22H22O13	[M+H]+	Laricitrin-3-O-glucoside	Flavonoids	Flavonols
HJAP006	Positive	509.13	347.08	508.122	C23H24O13	[M+H]+	9	9	9	7540	5273	5306.2	9	4495.2	9	9	9	9	508.122	C23H24O13	[M+H]+	Syringetin-7-O-glucoside	Flavonoids	Flavonols
HJAP026	Positive	625.18	463.13	624.17	C28H32O16	[M+H]+	9	9	125890	24957	9	9	9	9	9	9	9	9	624.17	C28H32O16	[M+H]+	Chrysoeriol-6-C-glucoside-4'-O-glucoside	Flavonoids	Flavonoid carbonoside
HJAP061	Positive	743.2	303.05	742.195	C32H38O20	[M+H]+	9	9	14542	13728	9	9	9	9	9	9	9	9	742.195	C32H38O20	[M+H]+	Quercetin-3-O-(2''-O-arabinosyl)rutinoside	Flavonoids	Flavonols
HJAP064	Positive	565.12	317.08	564.088	C25H24O15	[M+H]+	8915	3049.8	786390	531130	3613.5	9144	13345	40728	86276	16109	125910	163610	564.088	C25H24O15	[M+H]+	Isorhamnetin-3-O-(6''-malonyl)glucoside	Flavonoids	Flavonols
HJAP120	Positive	625.17	317.07	624.168	C28H32O16	[M+H]+	16294	13044	1532000	1212800	17955	35878	25224	20390	281560	16052	16846	192930	624.168	C28H32O16	[M+H]+	Rhamnetin-3-O-Rutinoside*	Flavonoids	Flavonols
HJAP127	Positive	757.22	303.05	756.212	C33H40O20	[M+H]+	9	9	40220	21340	9	9	9	9	9	9	9	9	756.212	C33H40O20	[M+H]+	Quercetin-3-O-(2''-O-Rhamnosyl)rutinoside	Flavonoids	Flavonols
HJAP128	Positive	771.23	317.06	770.227	C34H42O20	[M+H]+	9	9	63902	28936	9	9	9	9	9	9	9	9	770.227	C34H42O20	[M+H]+	Isorhamnetin-3-O-rutinoside-7-O-rhamnoside	Flavonoids	Flavonols
HJN039	Negative	657.11	505.1	658.116	C30H26O17	[M-H]-	9	9	54385	43514	9	9	9	9	9	9	9	9	658.116	C30H26O17	[M-H]-	Myricetin-3-O-(2''-galloyl-4''-acetyl)rhamnoside	Flavonoids	Flavonols
HJN041	Negative	451.12	289.07	452.131	C21H24O11	[M-H]-	9	9	5892.8	9	9	9	9	4714.2	4999	173560	401510	232240	452.131	C21H24O11	[M-H]-	Epicatechin glucoside	Flavonoids	Flavanols
HJN044	Negative	863.19	711.14	864.19	C45H36O18	[M-H]-	9	9	6785.5	13014	9872	9	9	33870	9	1052900	1580700	1221600	864.19	C45H36O18	[M-H]-	Epicatechin-(4β→8,2β→O→7)-epicatechin-(4β→8)-epicatechin	Flavonoids	Flavanols
HJN045	Negative	847.19	411.07	848.195	C45H36O17	[M-H]-	9	9	9	9	9	9	9	9	9	23872	29900	18603	848.195	C45H36O17	[M-H]-	Epicatechin-(2β→O→7,4β→8)-epiafzelechin-(4α→8)-epicatechin	Flavonoids	Flavanols
HJN055	Negative	435.13	273.08	436.136	C21H24O10	[M-H]-	9	9	348260	293420	9	9	9	9	71457	9	9	55277	436.136	C21H24O10	[M-H]-	Dihydrocharcone-4'-O-glucoside	Flavonoids	Chalcones
HJN086	Negative	449.11	287.06	450.116	C21H22O11	[M-H]-	78197	60595	69190	121300	113780	318870	183660	198650	183000	960040	1493000	1127500	450.116	C21H22O11	[M-H]-	Eriodictyol-3'-O-glucoside	Flavonoids	Flavanones
HJN087	Negative	433.12	271.06	434.121	C21H22O10	[M-H]-	9	9	117000	63754	9	9	9	9	9	23897	55505	39829	434.121	C21H22O10	[M-H]-	Naringenin-4'-O-glucoside*	Flavonoids	Flavanones
Hmcp001578	Positive	641.17	479.11	640.163	C28H32O17	[M+H]+	9250	15280	284830	173810	7957.5	29738	15288	11672	33250	16434	46644	46454	640.163	C28H32O17	[M+H]+	Isorhamnetin-3,7-O-diglucoside*	Flavonoids	Flavonols
Hmcp001579	Positive	671.18	347.07	670.175	C29H34O18	[M+H]+	11474	15240	6857.8	20510	28104	28140	15981	15196	22059	3778.8	11342	8346	670.175	C29H34O18	[M+H]+	Limocitrin-3-O-sophoroside	Flavonoids	Flavonols
Hmcp001589	Positive	787.23	317.06	786.221	C34H42O21	[M+H]+	4329.8	7345.5	6399.5	21384	15285	26254	20734	8555	16524	7756	12021	5814	786.221	C34H42O21	[M+H]+	Isorhamnetin-3-O-rutinoside-4'-O-glucoside*	Flavonoids	Flavonols
Hmcp001598	Positive	611.16	317.06	610.153	C27H30O16	[M+H]+	9	9	4840.2	9	9	9	9	9	9	9	9	9	610.153	C27H30O16	[M+H]+	Isorhamnetin-3-O-(2''-O-xylosyl)glucoside	Flavonoids	Flavonols
Hmcp001829	Positive	595.16	303.04	594.158	C27H30O15	[M+H]+	9	9	341300	82136	9	9	9	9	5910.8	9	9	8258.2	594.158	C27H30O15	[M+H]+	Quercetin-3,7-Di-O-rhamnoside	Flavonoids	Flavonols
Hmcp001947	Positive	711.17	317.06	710.169	C31H34O19	[M+H]+	9	9	11552	11540	9	9	9	9	9	9	9	9	710.169	C31H34O19	[M+H]+	Isorhamnetin-3-O-(6''-malonyl)glucoside-7-O-rhamnoside	Flavonoids	Flavonols
Hmcp002207	Positive	479.12	317.06	478.111	C22H22O12	[M+H]+	105560	51834	2345000	1474200	154810	317510	147180	174170	438040	517190	834740	966130	478.111	C22H22O12	[M+H]+	Isorhamnetin-7-O-glucoside (Brassicin)*	Flavonoids	Flavonols
Hmcp002316	Positive	449.11	317.06	448.1	C21H20O11	[M+H]+	9	9	56334	47980	9	9	9	9	3679.5	9	9	9	448.1	C21H20O11	[M+H]+	Isorhamnetin-3-O-arabinoside	Flavonoids	Flavonols
Hmcp002539	Positive	463.12	317.06	462.116	C22H22O11	[M+H]+	9	9	11703	5660.3	9	9	9	9	9	9	9	9	462.116	C22H22O11	[M+H]+	Isorhamnetin-3-O-rhamnoside	Flavonoids	Flavonols
Hmgp001888	Positive	641.17	317.06	640.167	C28H32O17	[M+H]+	9	6965	74303	63619	9	9	6118	4385	9	9	9	17445	640.167	C28H32O17	[M+H]+	Patuletin-3-O-rutinoside	Flavonoids	Flavonols
Hmgp002121	Positive	609.18	463.08	608.176	C31H28O13	[M+H]+	9	9	25134	4310.8	9	9	9	9	9	9	9	9	608.176	C31H28O13	[M+H]+	Hispidulin-7-O-(6''-O-p-Coumaroyl)Glucoside	Flavonoids	Flavones
Hmgp002189	Positive	463.13	301.07	462.118	C22H22O11	[M+H]+	9	9	668880	540070	9	9	9	12950	85549	13333	9	89488	462.118	C22H22O11	[M+H]+	Hispidulin-7-O-Glucoside*	Flavonoids	Flavones
Hmln002199	Negative	505.1	300.03	506.107	C23H22O13	[M-H]-	9	773.5	83486	88153	9	9	2268	19937	19053	6312	358380	14258	506.107	C23H22O13	[M-H]-	Quercetin-3-O-(6''-O-acetyl)galactoside	Flavonoids	Flavonols
Hmlp003068	Positive	627.15	303.05	626.148	C27H30O17	[M+H]+	9	9	715730	453000	9	9	9	9	65818	45018	101790	168390	626.148	C27H30O17	[M+H]+	Meratin	Flavonoids	Flavones
Hmmp004965	Positive	463.12	301.07	462.116	C22H22O11	[M+H]+	9	9	837440	568570	9	9	9	9	97604	9	9	77056	462.116	C22H22O11	[M+H]+	Diosmetin-7-O-glucoside*	Flavonoids	Flavones
Hmpp002612	Positive	611.16	287.05	610.153	C27H30O16	[M+H]+	9	9	101110	15875	9	7544.8	5843.8	7521.7	9	9	9	14391	610.153	C27H30O16	[M+H]+	Luteolin-7-O-gentiobioside	Flavonoids	Flavones
Hmpp003270	Positive	449.11	287.05	448.101	C21H20O11	[M+H]+	6688.8	6636.8	60180	64656	6625	27950	28640	6289.2	32255	114800	190680	172360	448.101	C21H20O11	[M+H]+	Luteolin-4'-O-glucoside*	Flavonoids	Flavones
Hmqp003184	Positive	667.15	287.06	666.143	C29H30O18	[M+H]+	9	9	7335.5	5682.2	9	9	9	9	9	9	9	9	666.143	C29H30O18	[M+H]+	Luteolin-7-O-(6''-malonyl)glucoside-5-O-arabinoside	Flavonoids	Flavones
Hmqp003435	Positive	651.15	271.06	650.142	C29H30O17	[M+H]+	9	9	48913	20252	9	9	9	9	9	9	9	9	650.142	C29H30O17	[M+H]+	Apigenin-7-O-(2''-O-apiosyl)(6''-Malonyl)glucoside	Flavonoids	Flavones
Jmgn004021	Negative	449.11	269.05	450.116	C21H22O11	[M-H]-	371920	305910	419550	465690	506580	1309400	800250	780440	1057700	1821500	2868100	2587400	450.116	C21H22O11	[M-H]-	6-C-Glucosyl-2-Hydroxynaringenin	Flavonoids	Flavanones
Li512111	Negative	519.11	315.05	520.122	C24H24O13	[M-H]-	8978.2	9	564990	416560	9	11602	9	13192	51416	6712	28272	69036	520.122	C24H24O13	[M-H]-	Isorhamnetin-3-O-(6''-acetylglucoside)	Flavonoids	Flavonols
Lmbp002336	Positive	611.16	303.05	610.153	C27H30O16	[M+H]+	3829.5	9	414940	72613	9	9	9	7733	3078	9	9	9	610.153	C27H30O16	[M+H]+	Quercetin-3-O-(2''-O-rhamnosyl)galactoside	Flavonoids	Flavonols
Lmbp002592	Positive	611.16	287.05	610.153	C27H30O16	[M+H]+	9	9	99072	67180	9	9	9	9	9	13038	16915	9703.5	610.153	C27H30O16	[M+H]+	Kaempferol-3,7-O-diglucoside	Flavonoids	Flavonols
Lmbp003668	Positive	419.1	287.05	418.09	C20H18O10	[M+H]+	9	9	27515	28836	9	9	9	9	6266.5	9	9	6575.8	418.09	C20H18O10	[M+H]+	Kaempferol-3-O-arabinoside	Flavonoids	Flavonols
Lmdp003110	Positive	289.07	243.07	288.063	C15H12O6	[M+H]+	10908	4599.5	10004	15641	21822	35136	27590	58761	44626	40454	93420	87338	288.063	C15H12O6	[M+H]+	2,6,7,4'-Tetrahydroxyisoflavanone	Flavonoids	Dihydroisoflavones
Lmdp003171	Positive	463.12	317.07	462.116	C22H22O11	[M+H]+	9	9	159130	98252	9	6486	4088.8	5721	15423	9	9	20892	462.116	C22H22O11	[M+H]+	Azalein (Azaleatin-3-O-rhamnoside)	Flavonoids	Flavonols
Lmdp003286	Positive	465.1	303.06	464.095	C21H20O12	[M+H]+	24760	23374	771470	564780	10373	26775	49670	80144	135840	1567400	3388900	2498000	464.095	C21H20O12	[M+H]+	Isohyperoside*	Flavonoids	Flavonols
Lmdp003509	Positive	435.09	303.06	434.085	C20H18O11	[M+H]+	9	9	241400	119820	9	9	8642.8	9	9	9	23668	27741	434.085	C20H18O11	[M+H]+	Quercetin-3-O-xyloside (Reynoutrin)*	Flavonoids	Flavonols
Lmdp003808	Positive	317.07	302.04	316.058	C16H12O7	[M+H]+	9	9	25382	25526	3721.8	1483	3003	9	3705.8	6809	12852	15403	316.058	C16H12O7	[M+H]+	Azaleatin (5-O-Methylquercetin)	Flavonoids	Flavonols
Lmdp004892	Positive	535.11	287.05	534.101	C24H22O14	[M+H]+	4325	9	670760	577790	11577	9	5112.2	9	69792	11717	8724	120910	534.101	C24H22O14	[M+H]+	Kaempferol-3-O-(6''-malonyl)galactoside*	Flavonoids	Flavonols
Lmfn003760	Negative	477.07	301.04	478.075	C21H18O13	[M-H]-	9	9	228560	204360	9	9	9	9	39346	9	9	39880	478.075	C21H18O13	[M-H]-	Quercetin-4'-O-glucuronide	Flavonoids	Flavonols
Lmfn004093	Negative	435.13	315.09	436.137	C21H24O10	[M-H]-	16778	7752.5	15693	30717	24379	14521	36002	58313	19246	496100	977720	936160	436.137	C21H24O10	[M-H]-	Phloretin-4'-O-glucoside (Trilobatin)	Flavonoids	Chalcones
Lmgn004551	Negative	369.14	193.09	370.142	C21H22O6	[M-H]-	20537	2642.1	107320	13530	198290	164980	2845.2	9593.2	3528.7	47488	8399.7	12898	370.142	C21H22O6	[M-H]-	Kenusanone I	Flavonoids	Flavanones
Lmhp206353	Positive	493.13	331.08	492.127	C23H24O12	[M+H]+	9	9	9	9	9	5816.8	9	9	9	3063.8	9377.2	4345.2	492.127	C23H24O12	[M+H]+	Tricin-4'-O-glucoside*	Flavonoids	Flavones
Lmjp002461	Positive	611.16	303.05	610.153	C27H30O16	[M+H]+	1718.2	9	1071500	832780	2558.2	4315	6899	863	123770	5978	2591.2	139710	610.153	C27H30O16	[M+H]+	Quercetin-3-O-neohesperidoside*	Flavonoids	Flavonols
Lmjp002596	Positive	597.14	303.05	596.138	C26H28O16	[M+H]+	9	9	49083	38036	9	9	9	9	9867.2	8232.5	46642	9	596.138	C26H28O16	[M+H]+	Quercetin-3-O-sambubioside*	Flavonoids	Flavonols
Lmjp002867	Positive	595.17	287.05	594.158	C27H30O15	[M+H]+	37228	28164	15744000	10271000	54738	65911	70838	42584	1945700	55740	41261	1457600	594.158	C27H30O15	[M+H]+	Kaempferol-3-O-neohesperidoside*	Flavonoids	Flavonols
Lmjp002906	Positive	479.12	317.07	478.111	C22H22O12	[M+H]+	93979	61974	2163700	1319400	139540	260230	166440	165580	385230	518210	874680	939110	478.111	C22H22O12	[M+H]+	Rhamnetin-3-O-Glucoside*	Flavonoids	Flavonols
Lmjp003044	Positive	479.12	317.06	478.111	C22H22O12	[M+H]+	102940	69733	2124700	1292500	115890	256500	121520	155080	394380	529300	838530	804680	478.111	C22H22O12	[M+H]+	Isorhamnetin-3-O-Glucoside*	Flavonoids	Flavonols
Lmjp003295	Positive	479.12	317.07	478.111	C22H22O12	[M+H]+	77231	68231	2344200	1453900	126640	236220	161270	145730	430450	540650	839180	902230	478.111	C22H22O12	[M+H]+	6-Methoxykaempferol-3-O-glucoside	Flavonoids	Flavonols
Lmjp003655	Positive	463.12	301.08	462.116	C22H22O11	[M+H]+	9	9	713020	544080	9	9	9	9	87010	6378.8	4966.8	113860	462.116	C22H22O11	[M+H]+	6-C-MethylKaempferol-3-glucoside	Flavonoids	Flavones
Lmjp004941	Positive	301.07	286.05	300.063	C16H12O6	[M+H]+	9	9	88433	58484	9	9	9	9	10319	9	9	8374.7	300.063	C16H12O6	[M+H]+	Rhamnocitrin (7-Methylkaempferol)	Flavonoids	Flavonols
Lmlp003531	Positive	449.11	287.06	448.101	C21H20O11	[M+H]+	2233.8	6678.8	46789	57560	14010	28576	15880	12538	16139	93319	169800	147660	448.101	C21H20O11	[M+H]+	Luteolin-3'-O-glucoside*	Flavonoids	Flavones
Lmlp005236	Positive	451.12	289.08	450.116	C21H22O11	[M+H]+	9	2442.8	28411	24864	9	9	9	9	5955.2	54934	96527	52616	450.116	C21H22O11	[M+H]+	Dihydrokaempferol-3-O-glucoside	Flavonoids	Flavanonols
Lmlp005572	Positive	433.11	271.06	432.106	C21H20O10	[M+H]+	9	9	1287700	669270	9	20120	9	9	99449	12326	9	130320	432.106	C21H20O10	[M+H]+	Galangin-7-O-glucoside	Flavonoids	Flavones
Lmlp006175	Positive	435.13	273.09	434.121	C21H22O10	[M+H]+	15206	10007	47886	46240	21760	74109	33192	25126	35550	340050	599970	324460	434.121	C21H22O10	[M+H]+	Isosalipurposide (Phlorizin Chalcone)	Flavonoids	Chalcones
Lmlp007435	Positive	581.17	147.04	580.158	C30H28O12	[M+H]+	9	9	111740	86807	9	9	9	9	10907	9	9	17257	580.158	C30H28O12	[M+H]+	Isosalipurposide-6''-O-p-coumaric acid	Flavonoids	Chalcones
Lmmn003398	Negative	489.11	285.04	490.111	C23H22O12	[M-H]-	9	9	159480	89470	9	9	9	9	9	9	9	22421	490.111	C23H22O12	[M-H]-	Kaempferol-3-O-(6''-acetyl)glucoside	Flavonoids	Flavonols
Lmmn004625	Negative	449.11	287.06	450.116	C21H22O11	[M-H]-	92874	73213	78567	138240	139290	374660	197740	207300	201860	1078600	1400000	1286700	450.116	C21H22O11	[M-H]-	Dihydrokaempferol-7-O-glucoside	Flavonoids	Flavanonols
Lmmp002334	Positive	773.21	303.05	772.206	C33H40O21	[M+H]+	9	9	26120	17702	9	9	9	9	9	9	9	9	772.206	C33H40O21	[M+H]+	Quercetin-3-O-rutinoside-7-O-glucoside	Flavonoids	Flavonols
Lmmp002463	Positive	625.18	317.07	624.169	C28H32O16	[M+H]+	21199	10609	1897000	1328700	32594	31891	17125	13870	283090	29896	25671	271850	624.169	C28H32O16	[M+H]+	Sexangularetin-3-O-glucoside-7-O-rhamnoside	Flavonoids	Flavonols
Lmmp002755	Positive	773.21	303.05	772.206	C33H40O21	[M+H]+	9	9	19058	12324	9	9	9	9	9	9	9	9	772.206	C33H40O21	[M+H]+	Quercetin-7-O-rutinoside-4'-O-glucoside	Flavonoids	Flavonols
Lmmp003091	Positive	611.16	303.05	610.153	C27H30O16	[M+H]+	9	9	1032400	740090	877.5	9	6864	863	119600	5137.2	1716.8	102860	610.153	C27H30O16	[M+H]+	Quercetin-3-O-(4''-O-glucosyl)rhamnoside	Flavonoids	Flavonols
Lmmp003266	Positive	683.15	303.05	682.138	C29H30O19	[M+H]+	9	9	14220	6696	9	9	9	9	9	9	7752.2	9	682.138	C29H30O19	[M+H]+	Quercetin-3-O-(2''-O-malonyl)glucoside-7-O-arabinoside	Flavonoids	Flavonols
Lmmp003672	Positive	593.17	441.11	592.158	C31H28O12	[M+H]+	9	9	9	9	9	9	9	9	9	54474	84216	101430	592.158	C31H28O12	[M+H]+	8,8'-Methylenebiscatechin	Flavonoids	Flavanols
Lmmp003783	Positive	479.09	303.05	478.075	C21H18O13	[M+H]+	9	9	195430	120940	9	9	9	9	18590	9	9	24244	478.075	C21H18O13	[M+H]+	Quercetin-3-O-glucuronide	Flavonoids	Flavonols
Lmmp003817	Positive	535.11	287.05	534.101	C24H22O14	[M+H]+	9	9	125160	42505	9	9	9	9	12300	9	10664	25544	534.101	C24H22O14	[M+H]+	Kaempferol-3-O-(6''-malonyl)glucoside*	Flavonoids	Flavonols
Lmnp002413	Positive	595.17	449.11	594.158	C27H30O15	[M+H]+	9	9	92864	29098	9	9	9	9	9	9	9	9	594.158	C27H30O15	[M+H]+	Luteolin-6-C-glucoside-7-O-rhamnoside	Flavonoids	Flavonoid carbonoside
Lmnp002584	Positive	625.18	463.13	624.169	C28H32O16	[M+H]+	9	9	110890	9990	9	9	9	9	9	9	9	9	624.169	C28H32O16	[M+H]+	Hispidulin-8-C-(2''-O-glucosyl)glucoside	Flavonoids	Flavonoid carbonoside
Lmpn006208	Negative	461.11	315.05	462.116	C22H22O11	[M-H]-	9	9	56277	65533	9	9	9	9	9398.8	9	9	11440	462.116	C22H22O11	[M-H]-	8-Methoxykaempferol-7-O-rhamnoside	Flavonoids	Flavonols
Lmsn003297	Negative	449.11	287.06	450.116	C21H22O11	[M-H]-	34428	28161	50085	49187	21816	77566	34989	38903	41660	331820	513290	515840	450.116	C21H22O11	[M-H]-	3,4,2',4',6'-Pentahydroxychalcone-4'-O-glucoside	Flavonoids	Chalcones
Lmsp002982	Positive	773.21	303.05	772.206	C33H40O21	[M+H]+	9	9	32153	15240	9	9	9	9	9	9	9	9	772.206	C33H40O21	[M+H]+	Quercetin-3-O-sophoroside-7-O-rhamnoside	Flavonoids	Flavonols
Lmsp003252	Positive	641.17	317.07	640.164	C28H32O17	[M+H]+	17334	8570.8	513600	364100	15226	39840	26372	20728	55717	25318	73281	79269	640.164	C28H32O17	[M+H]+	Isorhamnetin-3-O-sophoroside*	Flavonoids	Flavonols
Lmsp003790	Positive	787.23	317.07	786.222	C34H42O21	[M+H]+	6831.5	6188	10379	14672	6679.5	38518	18859	11016	17922	8955.5	6335.5	10919	786.222	C34H42O21	[M+H]+	Isorhamnetin-3-O-sophoroside-7-O-rhamnoside*	Flavonoids	Flavonols
Lmsp003939	Positive	625.18	317.07	624.169	C28H32O16	[M+H]+	9	9	386380	63318	9	9	9	9	7549.2	9	9	13088	624.169	C28H32O16	[M+H]+	Isorhamnetin-3-O-galactoide-7-O-rhamnoside*	Flavonoids	Flavonols
Lmsp004045	Positive	625.18	317.07	624.169	C28H32O16	[M+H]+	5065.5	9	329540	59954	9	4957.5	9	9	16665	11514	9	5743	624.169	C28H32O16	[M+H]+	Isorhamnetin-3-O-glucoside-7-O-rhamnoside*	Flavonoids	Flavonols
Lmsp004166	Positive	611.16	303.05	610.153	C27H30O16	[M+H]+	868.75	3494.8	1223400	849230	3442.5	863	1740.5	863	115210	9452.5	2580.5	152680	610.153	C27H30O16	[M+H]+	Quercetin-3-O-glucoside-7-O-rhamnoside	Flavonoids	Flavonols
Lmtn002796	Negative	449.1	287.05	450.116	C21H22O11	[M-H]-	450550	355400	355950	910800	727880	1597600	780410	881160	1255600	2320500	2802700	2576900	450.116	C21H22O11	[M-H]-	Aromadendrin-7-O-glucoside	Flavonoids	Flavanonols
Lmtp002474	Positive	565.16	427.1	564.148	C26H28O14	[M+H]+	9	9	7107.8	9	9	23767	9	9	9	39282	9	9	564.148	C26H28O14	[M+H]+	Apigenin-6-C-(2''-glucosyl)arabinoside	Flavonoids	Flavonoid carbonoside
Lmtp004044	Positive	597.14	303.04	596.138	C26H28O16	[M+H]+	9	9	36710	28801	9	9	9	9	9	9	9	9	596.138	C26H28O16	[M+H]+	Quercetin-3-O-apiosyl(1→2)galactoside*	Flavonoids	Flavonols
Lmtp004722	Positive	333.06	153.02	332.053	C16H12O8	[M+H]+	13414	6494	4997.8	12888	13076	12919	11566	8576.2	7858.5	17481	11807	13367	332.053	C16H12O8	[M+H]+	Mearnsetin	Flavonoids	Flavones
Lmwp004293	Positive	935.25	303.05	934.238	C42H46O24	[M+H]+	9	9	7690.5	5969.2	9	9	9	9	9	9	9	9	934.238	C42H46O24	[M+H]+	Quercetin-3-O-(2'''-O-p-coumaroyl)sophoroside-7-O-glucoside	Flavonoids	Flavonols
Lmyn006922	Negative	447.13	285.08	448.137	C22H24O10	[M-H]-	13418	9849.9	26002	10191	9925.4	21485	7837	5341.3	13475	24271	21336	20139	448.137	C22H24O10	[M-H]-	Sakuranin	Flavonoids	Flavanones
Lmyp004052	Positive	611.14	147.04	610.132	C30H26O14	[M+H]+	9	9	6772.1	9	9	9	9	9	9	9	9	9	610.132	C30H26O14	[M+H]+	Quercetin-3-O-(6''-O-p-Coumaroyl)galactoside	Flavonoids	Flavonols
Lmyp004318	Positive	595.14	287.06	594.137	C30H26O13	[M+H]+	9	9	18729	16174	9	9	9	9	9	9	9	2663.8	594.137	C30H26O13	[M+H]+	Kaempferol-3-O-(6''-p-Coumaroyl)galactoside*	Flavonoids	Flavonols
Lmyp004407	Positive	595.14	287.05	594.137	C30H26O13	[M+H]+	9	9	24745	19505	9	9	9	9	9	9	9	4901.9	594.137	C30H26O13	[M+H]+	Kaempferol-3-O-(2''-p-Coumaroyl)galactoside*	Flavonoids	Flavonols
Lmyp004617	Positive	419.13	257.08	418.127	C21H22O9	[M+H]+	9	9	9	9	9	9	9	9	9	13507	25154	28811	418.127	C21H22O9	[M+H]+	Pinocembrin-7-O-glucoside (Pinocembroside)	Flavonoids	Flavanones
Lmyp004889	Positive	595.14	287.05	594.137	C30H26O13	[M+H]+	9	9	10666	14646	9	9	9	9	9	9	9	9	594.137	C30H26O13	[M+H]+	Kaempferol-3-O-(2''-p-Coumaroyl)glucoside*	Flavonoids	Flavonols
Lmzn001894	Negative	461.07	285.04	462.08	C21H18O12	[M-H]-	46119	29714	14064000	12974000	98314	73506	52274	64400	1787100	127150	73117	2562800	462.08	C21H18O12	[M-H]-	Kaempferol-3-O-glucuronide	Flavonoids	Flavonols
Lmzp002365	Positive	465.14	303.09	464.131	C22H24O11	[M+H]+	4438.5	9	25808	30452	13910	5862	8826.5	27080	25920	63181	125950	104800	464.131	C22H24O11	[M+H]+	Hesperetin-7-O-glucoside	Flavonoids	Flavanones
Lnrp102163	Positive	757.21	303.05	756.211	C33H40O20	[M+H]+	9	9	39366	18771	9	9	9	9	9	9	9	9	756.211	C33H40O20	[M+H]+	Quercetin-3-O-rutinoside-7-O-rhamnoside	Flavonoids	Flavonols
mws0034	Negative	457.08	169.01	458.085	C22H18O11	[M-H]-	11297	20578	95806	206880	18048	4361.5	11909	164780	16355	9	9	11111	458.085	C22H18O11	[M-H]-	Epigallocatechin-3-gallate*	Flavonoids	Flavanols
mws0036	Negative	609.18	301.09	610.19	C28H34O15	[M-H]-	21584	18756	11371	6012.5	27719	27654	118600	11194	35074	44248	43186	18979	610.19	C28H34O15	[M-H]-	Hesperetin-7-O-rutinoside (Hesperidin)*	Flavonoids	Flavanones
mws0038	Negative	313.07	283	314.079	C17H14O6	[M-H]-	7134	10452	4980.9	5671.3	9	12939	2493.8	9	92880	9	4502.7	3517.2	314.079	C17H14O6	[M-H]-	Kumatakenin	Flavonoids	Flavonols
mws0043	Positive	403.14	373.1	402.131	C21H22O8	[M+H]+	18868	5859.8	6301.1	9	2263.6	17145	8954.1	9859.4	6044.6	23496	8992.6	3628.2	402.131	C21H22O8	[M+H]+	Nobiletin (5,6,7,8,3',4'-Hexamethoxyflavone)	Flavonoids	Flavones
mws0044	Negative	303.05	125.02	304.058	C15H12O7	[M-H]-	9	9	8329.2	17040	9	9	9	9	9	74211	149730	65699	304.058	C15H12O7	[M-H]-	Taxifolin(Dihydroquercetin)	Flavonoids	Flavanonols
mws0045	Positive	449.11	303.05	448.101	C21H20O11	[M+H]+	9	9	3753.2	4495.2	9	9	9	9	8155	9	9	9	448.101	C21H20O11	[M+H]+	Quercetin-3-O-rhamnoside(Quercitrin)	Flavonoids	Flavonols
mws0049	Positive	307.08	139	306.074	C15H14O7	[M+H]+	9	9	9	5407.5	9	9	9	9	9	9	9	9	306.074	C15H14O7	[M+H]+	Gallocatechin	Flavonoids	Flavanols
mws0055	Positive	373.13	343.09	372.121	C20H20O7	[M+H]+	13671	4887	4834.1	1876.1	1838.8	10556	4109.1	7010.7	4589.7	11352	5915.7	2045.6	372.121	C20H20O7	[M+H]+	Tangeretin (4',5,6,7,8-Pentamethoxyflavone)	Flavonoids	Flavones
mws0058	Negative	299.06	284	300.063	C16H12O6	[M-H]-	9	9	705000	427400	3868.5	9	9	9	90820	9542.4	8609	60849	300.063	C16H12O6	[M-H]-	Diosmetin (5,7,3'-Trihydroxy-4'-methoxyflavone)*	Flavonoids	Flavones
mws0061	Negative	463.09	300	464.095	C21H20O12	[M-H]-	72644	92410	2648200	2341300	60042	68270	121750	333890	445430	5452900	7808400	6091200	464.095	C21H20O12	[M-H]-	Quercetin-3-O-galactoside (Hyperin)*	Flavonoids	Flavonols
mws0064	Negative	287.06	135	288.063	C15H12O6	[M-H]-	9	9	9	9	9	9	9	9	9	47099	63408	51780	288.063	C15H12O6	[M-H]-	Eriodictyol (5,7,3',4'-Tetrahydroxyflavanone)	Flavonoids	Flavanones
mws0066	Negative	315.05	151	316.058	C16H12O7	[M-H]-	9	9	72613	31334	9	9	9	9	8717.6	9	9	5329.5	316.058	C16H12O7	[M-H]-	Isorhamnetin	Flavonoids	Flavonols
mws0089	Negative	447.09	285.04	448.101	C21H20O11	[M-H]-	32554	18535	372460	246700	35418	105710	51344	66534	105030	362780	598940	614820	448.101	C21H20O11	[M-H]-	Kaempferol-7-O-glucoside*	Flavonoids	Flavonols
mws0355	Negative	441.08	169.02	442.09	C22H18O10	[M-H]-	8229.8	8315.8	74664	123130	18200	14346	10874	30691	8955	3163	2242.5	14804	442.09	C22H18O10	[M-H]-	Catechin gallate*	Flavonoids	Flavanols
mws0856	Negative	463.09	301	464.095	C21H20O12	[M-H]-	40995	40397	1377800	929070	38824	41779	67412	167680	218330	2494800	4849400	3052700	464.095	C21H20O12	[M-H]-	Quercetin-4'-O-glucoside (Spiraeoside)*	Flavonoids	Flavonols
mws0913	Negative	447.09	285	448.101	C21H20O11	[M-H]-	28663	35841	322200	316200	42398	109470	52982	67089	152250	348820	645450	676860	448.101	C21H20O11	[M-H]-	Kaempferol-3-O-galactoside (Trifolin)*	Flavonoids	Flavonols
mws0914	Negative	271.06	151	272.068	C15H12O5	[M-H]-	7268.9	9	53967	38763	8354.8	27770	9	7504.2	4701.3	286360	453050	262660	272.068	C15H12O5	[M-H]-	Pinobanksin*	Flavonoids	Flavanonols
mws0917	Negative	329.07	314	330.074	C17H14O7	[M-H]-	9	2268.8	2306.6	3427	9	9	9	9	12926	9	9	9	330.074	C17H14O7	[M-H]-	3,7-Di-O-methylquercetin	Flavonoids	Flavonols
mws0919	Negative	431.1	285	432.106	C21H20O10	[M-H]-	9	9	23632	13070	9	9	9	9	9	9	9	4323	432.106	C21H20O10	[M-H]-	Kaempferol-3-O-rhamnoside (Afzelin)(Kaempferin)	Flavonoids	Flavonols
mws1000	Negative	287.06	149	288.063	C15H12O6	[M-H]-	13769	8124.5	41397	77782	22416	9	26395	31787	9	2468700	3041700	2998900	288.063	C15H12O6	[M-H]-	Fustin	Flavonoids	Flavanonols
mws1002	Negative	345.06	330	346.069	C17H14O8	[M-H]-	9	9	4191.9	4480.5	9	9	9	9	9	9	9	9	346.069	C17H14O8	[M-H]-	Syringetin	Flavonoids	Flavonols
mws1035	Positive	741.22	433	740.216	C33H40O19	[M+H]+	6275	9	1010100	190890	9	9	9	5729.8	12171	9	9	15073	740.216	C33H40O19	[M+H]+	Kaempferol-3-O-robinoside-7-O-rhamnoside (Robinin)	Flavonoids	Flavonols
mws1073	Positive	595.17	457.2	594.158	C27H30O15	[M+H]+	34712	23116	60306	87826	38912	102820	53571	38395	43288	129450	113400	130560	594.158	C27H30O15	[M+H]+	Apigenin-6,8-di-C-glucoside (Vicenin-2)	Flavonoids	Flavonoid carbonoside
mws1094	Negative	287.06	259	288.063	C15H12O6	[M-H]-	9	9	9	9	9	9	9	2969.8	9	23821	55457	37212	288.063	C15H12O6	[M-H]-	Aromadendrin (Dihydrokaempferol)	Flavonoids	Flavanonols
mws1179	Negative	433.11	271	434.121	C21H22O10	[M-H]-	43810	30097	65034	60808	53544	192380	108690	74484	129670	1218300	2743700	2118400	434.121	C21H22O10	[M-H]-	Naringenin-7-O-glucoside (Prunin)*	Flavonoids	Flavanones
mws1292	Positive	565.16	409.09	564.123	C26H28O14	[M+H]+	9	9	9541.2	9	9	12478	9	9	9	22355	9	9	564.123	C26H28O14	[M+H]+	Isoschaftoside	Flavonoids	Flavonoid carbonoside
mws1329	Negative	463.09	301.03	464.095	C21H20O12	[M-H]-	24378	50256	1347800	1053700	35612	37171	72040	201260	244160	3060300	5476700	3249200	464.095	C21H20O12	[M-H]-	Quercetin-7-O-glucoside*	Flavonoids	Flavonols
mws1361	Negative	449.11	151	450.116	C21H22O11	[M-H]-	19957	19196	22317	38712	42959	74195	47248	56416	55609	331660	530150	408270	450.116	C21H22O11	[M-H]-	Taxifolin-3-O-rhamnoside (Astilbin)	Flavonoids	Flavanonols
mws1397	Negative	441.08	169	442.09	C22H18O10	[M-H]-	13534	7507.2	43824	138300	15892	16430	10516	20255	14236	9	9	17007	442.09	C22H18O10	[M-H]-	Epicatechin gallate*	Flavonoids	Flavanols
mws1454	Negative	477.14	315	478.148	C23H26O11	[M-H]-	9	9	9	9	9	9	9	9	9	20424	22778	31013	478.148	C23H26O11	[M-H]-	Persicoside	Flavonoids	Flavanones
MWS20145	Positive	451.12	289.07	450.116	C21H22O11	[M+H]+	9	9	56313	42637	9	9	9	9	9	75441	94236	53598	450.116	C21H22O11	[M+H]+	Eriodictyol-7-O-glucoside	Flavonoids	Flavanones
MWS20148	Positive	433.11	271.07	432.106	C21H20O10	[M+H]+	9	9	1052300	727370	9	24958	9	9	98889	33060	9	83319	432.106	C21H20O10	[M+H]+	Apigenin-4'-O-glucoside*	Flavonoids	Flavones
mws2118	Negative	435.13	166.7	436.137	C21H24O10	[M-H]-	9656	45538	28944	19820	12708	36558	32912	33724	21419	67860	77562	56256	436.137	C21H24O10	[M-H]-	Phloretin-2'-O-glucoside (Phlorizin)	Flavonoids	Chalcones
mws2186	Positive	435.09	303	434.085	C20H18O11	[M+H]+	9	9	157720	123660	9	9	9	9	24516	9	19637	9793.5	434.085	C20H18O11	[M+H]+	Avicularin(Quercetin-3-O-α-L-arabinofuranoside)*	Flavonoids	Flavonols
mws2220	Negative	457.08	169.02	458.085	C22H18O11	[M-H]-	12635	20004	105890	274000	22425	5649.2	8141.2	196270	17019	9960.8	9	12307	458.085	C22H18O11	[M-H]-	Gallocatechin 3-O-gallate*	Flavonoids	Flavanols
mws4167	Positive	463.09	287.06	462.08	C21H18O12	[M+H]+	11188	7553	3841800	3088300	26644	14958	33926	13405	436140	48220	17355	625650	462.08	C21H18O12	[M+H]+	Luteolin-7-O-glucuronide	Flavonoids	Flavones
mws4183	Negative	433.08	300.03	434.085	C20H18O11	[M-H]-	6061.5	9	650950	505240	5505	7603	9	9949.3	69088	7901.5	53715	66585	434.085	C20H18O11	[M-H]-	Quercetin-3-O-arabinoside (Guaijaverin)*	Flavonoids	Flavonols
MWSHY0031	Positive	447.09	271.06	446.085	C21H18O11	[M+H]+	10187	9969	6860700	4703200	15541	24338	20962	11613	739860	28306	5870.8	897260	446.085	C21H18O11	[M+H]+	Apigenin-7-O-glucuronide	Flavonoids	Flavones
MWSHY0046	Positive	465.1	303.05	464.095	C21H20O12	[M+H]+	27406	25284	732170	521980	17500	22397	43672	98686	128070	1424700	3423600	2184900	464.095	C21H20O12	[M+H]+	Quercetin-3-O-glucoside (Isoquercitrin)*	Flavonoids	Flavonols
MWSHY0050	Positive	595.17	287.05	594.158	C27H30O15	[M+H]+	41386	41964	15700000	10465000	59206	90884	62942	58698	2107900	43692	34952	1601200	594.158	C27H30O15	[M+H]+	Kaempferol-3-O-rutinoside(Nicotiflorin)*	Flavonoids	Flavonols
MWSHY0064	Positive	625.17	317.07	624.169	C28H32O16	[M+H]+	13852	11450	1714800	1349200	18769	26079	29470	25280	222780	18502	23258	225140	624.169	C28H32O16	[M+H]+	Isorhamnetin-3-O-neohesperidoside*	Flavonoids	Flavonols
MWSHY0067	Positive	611.16	303.05	610.153	C27H30O16	[M+H]+	9	9	200180	126930	9	9	9	9	13890	9	9	17986	610.153	C27H30O16	[M+H]+	Quercetin-3-O-rutinoside (Rutin)*	Flavonoids	Flavonols
MWSHY0079	Positive	419.13	257.08	418.126	C21H22O9	[M+H]+	9	9	23868	9	8543.8	388170	9	9	9	133920	9	9	418.126	C21H22O9	[M+H]+	Liquiritigenin-4'-O-Glucoside (Liquiritin)	Flavonoids	Flavanones
MWSHY0080	Positive	595.17	287.06	594.158	C27H30O15	[M+H]+	34822	21800	15314000	10028000	50052	81136	72436	49162	1802000	61895	36667	1804300	594.158	C27H30O15	[M+H]+	Luteolin-7-O-neohesperidoside (Lonicerin)*	Flavonoids	Flavones
MWSHY0135	Positive	625.18	317.08	624.169	C28H32O16	[M+H]+	26091	15464	1562100	1437000	13889	47319	22891	33499	271220	23240	11222	247600	624.169	C28H32O16	[M+H]+	Isorhamnetin-3-O-rutinoside (Narcissin)*	Flavonoids	Flavonols
MWSHY0136	Positive	449.11	287.06	448.101	C21H20O11	[M+H]+	6694	2973	61654	64288	6631.8	14352	21302	17643	18092	108610	173410	153160	448.101	C21H20O11	[M+H]+	Kaempferol-3-O-glucoside (Astragalin)*	Flavonoids	Flavonols
MWSHY0161	Positive	595.14	287.06	594.137	C30H26O13	[M+H]+	9	9	18927	16532	9	9	9	9	9	9	9	9	594.137	C30H26O13	[M+H]+	Kaempferol-3-O-(6''-p-Coumaroyl)glucoside (Tiliroside)*	Flavonoids	Flavonols
MWSHY0162	Positive	627.16	303.06	626.148	C27H30O17	[M+H]+	9	6192	19766	13917	9	9	13276	9	7121.2	44435	51100	47884	626.148	C27H30O17	[M+H]+	Quercetin-3-O-sophoroside (Baimaside)	Flavonoids	Flavonols
MWSHY0165	Positive	449.14	287.1	448.137	C22H24O10	[M+H]+	9	9	19049	14413	9	9	9	9	9	9	9	9	448.137	C22H24O10	[M+H]+	Isosakuranetin-7-O-glucoside (Isosakuranin)	Flavonoids	Flavonols
MWSHY0167	Positive	291.09	139.04	290.079	C15H14O6	[M+H]+	34882	20725	83550	113320	39773	9	43257	94659	10841	8899400	17252000	14948000	290.079	C15H14O6	[M+H]+	Catechin*	Flavonoids	Flavanols
MWSHY0189	Positive	433.11	271.07	432.106	C21H20O10	[M+H]+	9	9	999680	746110	9	16684	5879	9	93242	13282	17753	79583	432.106	C21H20O10	[M+H]+	Apigenin-7-O-glucoside(Cosmosiin)*	Flavonoids	Flavones
pma0214	Positive	479	317.1	478.111	C22H22O12	[M+H]+	8963.2	4068.8	1036700	976810	12506	27244	17015	13924	158220	23310	15262	174420	478.111	C22H22O12	[M+H]+	6-C-Methylquercetin-3-O-glucoside	Flavonoids	Flavonols
pmb0580	Positive	417.1	255.1	416.111	C21H20O9	[M+H]+	9	9	9	2884.6	9	9	9	9	9	5424.8	8118.1	11813	416.111	C21H20O9	[M+H]+	Chrysin-5-O-glucoside (Toringin)	Flavonoids	Flavones
pmb0608	Positive	549.12	301.4	548.117	C25H24O14	[M+H]+	9	9	180460	148650	9	9	9	9	9	9	9	9	548.117	C25H24O14	[M+H]+	Chrysoeriol-7-O-(6''-malonyl)glucoside	Flavonoids	Flavones
pmb0665	Positive	611.16	465.1	610.153	C27H30O16	[M+H]+	9	9	1723100	1203400	9	9	3453	9	263090	9	9	187110	610.153	C27H30O16	[M+H]+	Orientin-7-O-glucoside	Flavonoids	Flavonoid carbonoside
pmb0681	Positive	403.1	367.08	402.095	C20H18O9	[M+H]+	9	9	4361.8	9	9	9	9	9	9	9	9	9	402.095	C20H18O9	[M+H]+	Apigenin-8-C-Arabinoside	Flavonoids	Flavonoid carbonoside
pmb0686	Positive	537.12	289	536.117	C24H24O14	[M+H]+	9	9	17893	16820	9	9	9	9	9	9	9	9	536.117	C24H24O14	[M+H]+	Eriodictyol-7-O-(6''-malonyl)glucoside	Flavonoids	Flavanones
pmb0711	Positive	611.16	303.1	610.153	C27H30O16	[M+H]+	849.5	9	1362800	819300	1716	9	7748.2	2578.8	135870	5990.2	4308	127880	610.153	C27H30O16	[M+H]+	Quercetin-7-O-rutinoside*	Flavonoids	Flavonols
pmb0736	Positive	493.13	331.08	492.127	C23H24O12	[M+H]+	4817	9	9	9	9	12566	4933.5	9	7033	8533.8	6597.2	3659.8	492.127	C23H24O12	[M+H]+	Tricin-7-O-Glucoside*	Flavonoids	Flavones
pmb2947	Negative	865.2	407.1	866.206	C45H38O18	[M-H]-	36006	28443	62315	52435	63016	24183	67654	180830	39840	2976900	4423200	3769500	866.206	C45H38O18	[M-H]-	Catechin-catechin-catechin	Flavonoids	Flavanols
pmb2970	Negative	625.18	565.3	626.185	C28H34O16	[M-H]-	81250	40061	28228	129790	159060	200820	113530	77832	124860	110970	109760	87194	626.185	C28H34O16	[M-H]-	Hesperetin-5,7-di-O-glucoside	Flavonoids	Flavanones
pmb2979	Negative	549.12	387.1	550.132	C25H26O14	[M-H]-	24222	16317	41298	82012	64938	65957	43268	37555	32099	321060	356330	268090	550.132	C25H26O14	[M-H]-	Hesperetin-7-O-(6''-malonyl)glucoside	Flavonoids	Flavanones
pmb2997	Negative	799.19	461.1	800.201	C34H40O22	[M-H]-	9	9	9	8302	9	9	9	9	9	9	9	9	800.201	C34H40O22	[M-H]-	Chrysoeriol-7-O-Sophoroside-5-O-glucuronide	Flavonoids	Flavones
pmb2999	Negative	461.11	299.1	462.116	C22H22O11	[M-H]-	11224	25399	476130	389870	10130	26238	21533	54867	72630	619800	939930	532270	462.116	C22H22O11	[M-H]-	Chrysoeriol-5-O-glucoside	Flavonoids	Flavones
pmb3000	Negative	503.12	341.1	504.127	C24H24O12	[M-H]-	9	9	3631.5	16598	9	9	9	9	9	181590	119530	165240	504.127	C24H24O12	[M-H]-	Chrysoeriol-7-O-(6''-acetyl)glucoside	Flavonoids	Flavones
pmb3002	Negative	607.17	299	608.174	C28H32O15	[M-H]-	9	9	220120	99542	4042.5	9	9	9	40995	9	9	12728	608.174	C28H32O15	[M-H]-	Chrysoeriol-7-O-rutinoside	Flavonoids	Flavones
pmb3012	Negative	461.11	299.2	462.116	C22H22O11	[M-H]-	9	9	296850	288700	8455	9	9	9	67979	9	9	9	462.116	C22H22O11	[M-H]-	Chrysoeriol-7-O-glucoside	Flavonoids	Flavones
pmb3023	Negative	449.11	287	450.116	C21H22O11	[M-H]-	245940	186340	182350	290970	291970	679830	394340	374360	620860	1184000	1239500	1439900	450.116	C21H22O11	[M-H]-	Eriodictyol-8-C-glucoside	Flavonoids	Flavanones
pmb3041	Negative	521.09	329.2	522.101	C23H22O14	[M-H]-	113830	71758	843950	717130	177410	178580	136000	132110	215280	175300	181670	147890	522.101	C23H22O14	[M-H]-	Tricin-7-O-saccharic acid	Flavonoids	Flavones
pmb3114	Negative	561.14	289.2	562.148	C30H26O11	[M-H]-	11874	5257.5	16467	5868	11760	9	17821	33000	2633.2	533320	831390	800410	562.148	C30H26O11	[M-H]-	Epicatechin-epiafzelechin	Flavonoids	Flavanols
pmc1990	Negative	299.1	223.1	300.1	C17H16O5	[M-H]-	1092500	1093400	823020	863830	943000	837070	754710	1079500	1018100	661540	944080	827630	300.1	C17H16O5	[M-H]-	4'-Hydroxy-5,7-dimethoxyflavanone	Flavonoids	Flavanones
pme0001	Negative	609.18	301	610.19	C28H34O15	[M-H]-	26857	20918	8949	9942.8	20157	24622	130000	19541	21772	39682	34078	18229	610.19	C28H34O15	[M-H]-	Hesperetin-7-O-neohesperidoside(Neohesperidin)*	Flavonoids	Flavanones
pme0088	Negative	285.04	151	286.048	C15H10O6	[M-H]-	9	9	55207	30107	9	9	9	9	7211.1	5773	9	12301	286.048	C15H10O6	[M-H]-	Luteolin (5,7,3',4'-Tetrahydroxyflavone)	Flavonoids	Flavones
pme0368	Positive	579.17	271.01	578.164	C27H30O14	[M+H]+	9	9	9	9	9	9	7030.2	12347	9	473180	581770	620640	578.164	C27H30O14	[M+H]+	Apigenin-7-O-rutinoside (Isorhoifolin)	Flavonoids	Flavones
pme0376	Negative	271.06	151	272.068	C15H12O5	[M-H]-	5534.1	3273.3	64624	27272	7564.7	36557	5866.1	4166	7861.3	287090	496700	262140	272.068	C15H12O5	[M-H]-	Naringenin (5,7,4'-Trihydroxyflavanone)*	Flavonoids	Flavanones
pme0460	Positive	291.09	139.04	290.079	C15H14O6	[M+H]+	41796	17700	108180	254680	54453	5738.8	67405	93052	23467	10572000	21702000	16724000	290.079	C15H14O6	[M+H]+	Epicatechin*	Flavonoids	Flavanols
pme1598	Negative	463.12	301	464.132	C22H24O11	[M-H]-	18666	51118	1345100	1091000	29124	32764	60032	177550	292630	2643900	5627100	4606400	464.132	C22H24O11	[M-H]-	Hesperetin-5-O-glucoside	Flavonoids	Flavanones
pme1605	Negative	593.15	285	594.158	C27H30O15	[M-H]-	6385	7114.5	6570100	4274200	8767.5	19213	8829	24819	805500	17538	7865	473790	594.158	C27H30O15	[M-H]-	Kaempferol-3-O-robinobioside(Biorobin)*	Flavonoids	Flavonols
pme2493	Positive	579.17	287.05	578.164	C27H30O14	[M+H]+	21394	21973	3622300	706400	33568	17676	22092	31365	55258	1077400	1617800	1545400	578.164	C27H30O14	[M+H]+	Kaempferol-3,7-O-dirhamnoside (Kaempferitrin)	Flavonoids	Flavonols
pme2960	Positive	273.08	153	272.068	C15H12O5	[M+H]+	9	9	3296.4	9	9	5970.2	9	9	9	60242	88692	37689	272.068	C15H12O5	[M+H]+	Naringenin chalcone; 2',4,4',6'-Tetrahydroxychalcone	Flavonoids	Chalcones
pmn001415	Negative	451.1	341.06	452.111	C24H20O9	[M-H]-	263970	207080	167580	212160	598100	210230	247670	587630	169920	2827700	4249900	5081700	452.111	C24H20O9	[M-H]-	Catechin-(7,8-bc)-4β-(3,4-dihydroxyphenyl)-dihydro-2-(3H)-one	Flavonoids	Flavanols
pmn001418	Negative	451.1	341.06	452.111	C24H20O9	[M-H]-	14696	6697.5	6086.2	11931	7457.5	4444.5	14269	6732.2	7483	410470	830250	741660	452.111	C24H20O9	[M-H]-	Cinchonain Id	Flavonoids	Flavanols
pmn001583	Negative	609.15	300	610.153	C27H30O16	[M-H]-	4902	3435.8	2673900	2631500	16527	3456.5	7742.8	8983.5	409000	25542	9048	314630	610.153	C27H30O16	[M-H]-	Quercetin-3-O-robinobioside	Flavonoids	Flavonols
pmn001642	Negative	503.08	459.1	504.09	C23H20O13	[M-H]-	155220	88808	78800	112540	87560	101460	104540	106580	101310	68298	46123	52439	504.09	C23H20O13	[M-H]-	Kaempferol-3-O-(2''-O-acetyl)glucuronide	Flavonoids	Flavonols
pmn001644	Negative	519.08	300	520.085	C23H20O14	[M-H]-	9	9	91170	44353	9	9	9	9	9	9	9	13422	520.085	C23H20O14	[M-H]-	Quercetin-3-O-(2''-O-acetyl)glucuronide	Flavonoids	Flavonols
pmp000001	Positive	301.07	286.05	300.063	C16H12O6	[M+H]+	9	9	83400	47555	9	9	9	9	10978	9	9	9073.2	300.063	C16H12O6	[M+H]+	Hispidulin (5,7,4'-Trihydroxy-6-methoxyflavone)*	Flavonoids	Flavones
pmp000106	Positive	313.11	298.1	312.1	C18H16O5	[M+H]+	9	9	9	3940.4	9	9	9	9	9	9	9	9	312.1	C18H16O5	[M+H]+	5,7,4'-Trimethoxyflavone	Flavonoids	Flavones
pmp000172	Positive	477.14	315.08	476.132	C23H24O11	[M+H]+	9	9	13123	7413.8	9	9	9	9	9	9	9	2258.1	476.132	C23H24O11	[M+H]+	5,2'-Dihydroxy-7,8-dimethoxyflavone glycosides	Flavonoids	Flavones
pmp000237	Positive	579.13	283.06	578.127	C26H26O15	[M+H]+	9	9	9	9	9	9	9	9	9	153130	236720	271570	578.127	C26H26O15	[M+H]+	Apigenin-6-C-(2''-glucuronyl)xyloside	Flavonoids	Flavonoid carbonoside
pmp000362	Positive	369.13	313.07	368.126	C21H20O6	[M+H]+	9	9	13271	9	23968	85258	9	9	9	28865	9	6318.2	368.126	C21H20O6	[M+H]+	Glisoflavone	Flavonoids	Isoflavones
pmp000571	Positive	271.06	153.01	270.053	C15H10O5	[M+H]+	9	9	9506	9	9	9	9	9	9	9	9	9	270.053	C15H10O5	[M+H]+	Apigenin; 4',5,7-Trihydroxyflavone	Flavonoids	Flavones
pmp000579	Positive	463.12	301.07	462.116	C22H22O11	[M+H]+	9	9	780850	606680	9	9	9	9	69178	9919.6	6740.5	102540	462.116	C22H22O11	[M+H]+	Diosmetin-7-O-galactoside*	Flavonoids	Flavones
pmp000581	Positive	475.12	271.06	474.116	C23H22O11	[M+H]+	9	9	83745	61349	9	9	9	9	8329.9	9	9	6755.1	474.116	C23H22O11	[M+H]+	Apigenin-7-O-(6''-acetyl)glucoside	Flavonoids	Flavones
pmp000585	Positive	519.11	433.11	518.106	C24H22O13	[M+H]+	9	9	4755.5	3738.8	9	9	9	9	9	9	9	9	518.106	C24H22O13	[M+H]+	Apigenin-7-O-(6''-malonyl)glucoside	Flavonoids	Flavones
pmp000587	Positive	535.11	449.1	534.101	C24H22O14	[M+H]+	9	9	17529	16080	9	9	9	9	9	9	9	9	534.101	C24H22O14	[M+H]+	Luteolin-7-O-(6''-malonyl)glucoside	Flavonoids	Flavones
pmp000589	Positive	551.1	303.05	550.096	C24H22O15	[M+H]+	3283	6405	338490	227250	7994.2	3200	1600	73664	45698	14600	736390	46072	550.096	C24H22O15	[M+H]+	Quercetin-7-O-(6''-malonyl)glucoside	Flavonoids	Flavonols
pmp000592	Positive	595.17	325.09	594.158	C27H30O15	[M+H]+	9	9	17219	9535.1	9	9	9	9	9	9	9	9	594.158	C27H30O15	[M+H]+	Apigenin-7,4'-di-O-Glucoside	Flavonoids	Flavones
pmp000593	Positive	595.17	449.1	594.158	C27H30O15	[M+H]+	15420	15327	5724000	3629000	16838	30582	22947	12066	600260	20638	13219	445740	594.158	C27H30O15	[M+H]+	Luteolin-7-O-rutinoside*	Flavonoids	Flavones
pmp000596	Positive	627.16	465.1	626.148	C27H30O17	[M+H]+	9	9	54174	57362	9	9	9	9	15422	9	9	9	626.148	C27H30O17	[M+H]+	Quercetin-3-O-(2''-O-galactosyl)glucoside	Flavonoids	Flavonols
pmp001106	Positive	595.17	577.16	594.158	C27H30O15	[M+H]+	8997.2	8828.3	14692	20195	14550	14261	13013	10090	11006	25522	24173	34384	594.158	C27H30O15	[M+H]+	Vitexin-2''-O-glucoside*	Flavonoids	Flavonoid carbonoside
pmp001111	Positive	579.17	561.16	578.164	C27H30O14	[M+H]+	9	9	9	9	9	9	9	9	9	50138	84752	81934	578.164	C27H30O14	[M+H]+	Violanthin	Flavonoids	Flavonoid carbonoside
pmp001127	Positive	301.07	286.08	300.063	C16H12O6	[M+H]+	9	9	92377	52812	9	9	9	9	9969.1	9	9	8251.4	300.063	C16H12O6	[M+H]+	Chrysoeriol	Flavonoids	Flavones
Smfp005803	Positive	595.2	287.09	594.195	C28H34O14	[M+H]+	9	9	28901	17960	9	9	9	9	9	9	9	9	594.195	C28H34O14	[M+H]+	Didymin (Isosakuranetin-7-O-rutinoside)	Flavonoids	Flavanones
Xmgp006913	Positive	341.14	137.06	340.131	C20H20O5	[M+H]+	9	1697.7	214090	156780	4254.6	9	9	9	19898	26220	54671	53463	340.131	C20H20O5	[M+H]+	2,4,2',4'-tetrahydroxy-3'-prenylchalcone	Flavonoids	Chalcones
Xmsn002700	Negative	465.13	303.06	466.111	C21H22O12	[M-H]-	47337	18835	13324	48843	55397	95603	83611	62853	56666	169360	151980	125890	466.111	C21H22O12	[M-H]-	Taxifolin-3'-O-glucoside	Flavonoids	Flavanonols
Xmyp005599	Positive	611.16	287.06	610.153	C27H30O16	[M+H]+	9	9	13900	9999	9	9	9	9	9	9	9	9	610.153	C27H30O16	[M+H]+	Kaempferol-3-O-galactoside-4'-O-glucoside	Flavonoids	Flavonols
Xmyp005654	Positive	449.11	287.06	448.101	C21H20O11	[M+H]+	9	9	1523500	1093100	9	9	9	9	171790	9	9	9	448.101	C21H20O11	[M+H]+	Kaempferol-4'-O-glucoside*	Flavonoids	Flavonols
Zmcp002666	Positive	627.14	303.05	626.148	C27H30O17	[M+H]+	9	9	699690	476420	9	9	9	3052.2	62379	39234	107970	167630	626.148	C27H30O17	[M+H]+	Quercetin-3,7-Di-O-glucoside	Flavonoids	Flavonols
Zmcp003989	Positive	595.16	287.05	594.158	C27H30O15	[M+H]+	14749	13929	2047100	435880	6557.5	10624	15569	8172.5	25440	9909.8	9	36708	594.158	C27H30O15	[M+H]+	Kaempferol-3-O-rhamnosyl(1→2)glucoside	Flavonoids	Flavonols
Zmgp002857	Positive	757.22	303.05	756.211	C33H40O20	[M+H]+	9	9	64971	9122.8	9	9	9	9	9	9	9	9	756.211	C33H40O20	[M+H]+	Quercetin-3-O-α-rhamnosyl (1→2)-[α-rhamnosyl (1→6)]-β-glucoside	Flavonoids	Flavonols
Zmhn001036	Negative	433.11	271.06	434.121	C21H22O10	[M-H]-	8625	10419	13710	14281	23713	94948	13044	7904.8	16556	56033	79254	74608	434.121	C21H22O10	[M-H]-	Choerospondin	Flavonoids	Flavanones
Zmhn003257	Negative	299.06	284.04	300.063	C16H12O6	[M-H]-	16180	9	796720	489500	9	9	9	9	97104	14819	13499	61405	300.063	C16H12O6	[M-H]-	5,7,2'-Trhiyroxy-8-methoxyflavone*	Flavonoids	Flavones
Zmhp002730	Positive	627.16	303.05	626.148	C27H30O17	[M+H]+	9	9	617670	456570	6086	9	4895	4883	53827	49883	106260	133260	626.148	C27H30O17	[M+H]+	6-Hydroxykaempferol-6,7-O-Diglucoside	Flavonoids	Flavonols
Zmhp003514	Positive	301.07	286.05	300.063	C16H12O6	[M+H]+	9	9	86459	51822	9	9	9	9	9876.9	9	9	8517.9	300.063	C16H12O6	[M+H]+	6,7,8-Tetrahydroxy-5-methoxyflavone*	Flavonoids	Flavones
Zmjp003291	Positive	595.17	433.12	594.158	C27H30O15	[M+H]+	9	9	418200	93403	9	9	9	9	9	9	9	9	594.158	C27H30O15	[M+H]+	Vitexin-2''-O-galactoside*	Flavonoids	Flavonoid carbonoside
Zmlp003063	Positive	741.23	433.12	740.209	C33H40O19	[M+H]+	7602	5648.5	1177700	204090	9	3841.5	3219.5	9	8370.8	4597	9	19104	740.209	C33H40O19	[M+H]+	Luteolin-7-O-(2''-O-rhamnosyl)rutinoside	Flavonoids	Flavones
Zmpn004068	Negative	567.17	273.08	568.179	C26H32O14	[M-H]-	9	9	8942.2	4995.8	9	9	9	9	9	9	9	9	568.179	C26H32O14	[M-H]-	Phloretin-2'-O-(6''-O-xylosyl)glucoside	Flavonoids	Chalcones
Zmsp004363	Positive	507.12	303.05	506.106	C23H22O13	[M+H]+	9	9	5199.5	9	9	9	9	9	9	9	4467.5	9	506.106	C23H22O13	[M+H]+	Quercetin-3-O-(6''-O-acetyl)glucoside	Flavonoids	Flavonols
Cmpp003619	Positive	193.05	105.07	192.042	C10H8O4	[M+H]+	39247	46595	42338	52510	46186	39800	59472	64267	48754	21622	27328	18344	192.042	C10H8O4	[M+H]+	6,7-Dihydroxy-4-methylcoumarin	Lignans and Coumarins	Coumarins
Cmsn002480	Negative	523.22	475.2	524.226	C26H36O11	[M-H]-	9	9	9	11583	9	9	9	9	9	9	9	9	524.226	C26H36O11	[M-H]-	Secoisolariciresinol-9'-O-glucoside	Lignans and Coumarins	Lignans
Cmyn001328	Negative	339.07	177.02	340.079	C15H16O9	[M-H]-	26867	26902	5074.5	8183.2	28587	29042	21998	13286	14618	53370	57088	36481	340.079	C15H16O9	[M-H]-	Daphnin	Lignans and Coumarins	Coumarins
HJN083	Negative	521.2	359.15	522.211	C26H34O11	[M-H]-	34513	33805	48259	96711	60142	50711	9	53918	55493	472620	599430	688040	522.211	C26H34O11	[M-H]-	Lariciresinol-4'-O-glucoside	Lignans and Coumarins	Lignans
Hmgn004693	Negative	371.11	327.03	372.121	C20H20O7	[M-H]-	9	9	9	9	9	9	9	9	9	23609	33089	22525	372.121	C20H20O7	[M-H]-	8-Hydroxy-α-conidendrin	Lignans and Coumarins	Lignans
Hmln002100	Negative	535.18	373.13	536.189	C26H32O12	[M-H]-	70915	37326	37639	98358	82962	32786	61714	107980	65784	1008400	1069800	868680	536.189	C26H32O12	[M-H]-	Nortrachelogenin-4-O-glucoside	Lignans and Coumarins	Lignans
Hmln002355	Negative	549.2	387.15	550.204	C27H34O12	[M-H]-	9	9	32987	37169	9	9	9	9	9	9	9	9	550.204	C27H34O12	[M-H]-	5'-Methoxymatairesinoside	Lignans and Coumarins	Lignans
Hmln003169	Negative	387.14	329.14	388.153	C21H24O7	[M-H]-	9	9	9856.2	9	9	9	9	9	9	44406	68333	58231	388.153	C21H24O7	[M-H]-	Trachelogenin	Lignans and Coumarins	Lignans
Hmqn002118	Negative	161.02	133.03	162.032	C9H6O3	[M-H]-	89844	19281	47268	60457	172770	40212	51456	44756	69730	938330	1203700	1027400	162.032	C9H6O3	[M-H]-	Umbelliferone	Lignans and Coumarins	Coumarins
Hmqn002332	Negative	621.22	561.19	622.225	C30H38O14	[M-H]-	41443	24800	20709000	17801000	81223	55904	63388	70649	6382400	111690	30670	4783000	622.225	C30H38O14	[M-H]-	Pharsyringaresinol	Lignans and Coumarins	Lignans
Jmzn003632	Negative	521.2	329.14	522.21	C26H34O11	[M-H]-	110750	84004	825380	578000	221030	251650	171490	113030	235120	169770	272270	233670	522.21	C26H34O11	[M-H]-	Manglieside D	Lignans and Coumarins	Lignans
Lmbn001162	Negative	339.07	177.02	340.079	C15H16O9	[M-H]-	22060	12718	5204	14761	23534	32360	7721.5	10958	13769	37574	63462	31088	340.079	C15H16O9	[M-H]-	Esculetin-7-O-glucoside*	Lignans and Coumarins	Coumarins
Lmbn002160	Negative	373.13	343.12	374.137	C20H22O7	[M-H]-	13693	4091.2	9	9	14484	6981.5	7008.2	9	9	56947	39513	12822	374.137	C20H22O7	[M-H]-	8-Hydroxypinoresinol	Lignans and Coumarins	Lignans
Lmbp003208	Positive	385.12	223.06	384.106	C17H20O10	[M+H]+	9	9	16447	6170.5	9	9	9	9	9	9	12371	7449	384.106	C17H20O10	[M+H]+	Fraxidin-8-O-glucoside	Lignans and Coumarins	Coumarins
Lmbp003825	Positive	325.09	163.04	324.085	C15H16O8	[M+H]+	9	9	1208600	862790	9	9	9	9	218480	9	9	151220	324.085	C15H16O8	[M+H]+	Skimmin (7-Hydroxycoumarin-7-O-glucoside)	Lignans and Coumarins	Coumarins
Lmdn001925	Negative	537.2	375.15	538.205	C26H34O12	[M-H]-	30810	30840	38944	59046	37020	42933	16784	39380	58960	61702	36338	43523	538.205	C26H34O12	[M-H]-	Olivil-4'-O-glucoside	Lignans and Coumarins	Lignans
Lmdn004267	Negative	357.13	151.04	358.142	C20H22O6	[M-H]-	9	9	8276	22887	9	9	9	9	9	698300	1862800	997020	358.142	C20H22O6	[M-H]-	Epipinoresinol*	Lignans and Coumarins	Lignans
Lmgp003270	Positive	369.16	177.06	368.074	C16H16O10	[M+H]+	8241.5	9	790370	496320	90502	26892	23002	72440	114220	4845500	9751300	6410800	368.074	C16H16O10	[M+H]+	Scopoletin-7-O-glucuronide	Lignans and Coumarins	Coumarins
Lmmn002260	Negative	551.21	389.17	552.221	C27H36O12	[M-H]-	756230	634490	490260	913500	1206900	2282600	1247800	1140100	1529900	3353600	2725700	3645600	552.221	C27H36O12	[M-H]-	5'-Methoxyisolariciresinol-9'-O-glucoside	Lignans and Coumarins	Lignans
Lmmn002274	Negative	521.2	359.15	522.21	C26H34O11	[M-H]-	83077	38637	32786	93070	119210	142600	92953	67478	90790	104040	103950	116480	522.21	C26H34O11	[M-H]-	Isolariciresinol-9'-O-glucoside	Lignans and Coumarins	Lignans
Lmtn003096	Negative	523.21	361.14	524.226	C26H36O11	[M-H]-	363950	335470	580960	717370	783040	1057300	506940	393150	519390	287430	306320	313630	524.226	C26H36O11	[M-H]-	Secoisolariciresinol 4-O-glucoside	Lignans and Coumarins	Lignans
Lmyn003971	Negative	521.2	359.15	522.21	C26H34O11	[M-H]-	57386	25178	58950	100130	101340	154020	116080	99790	121180	96322	103150	102760	522.21	C26H34O11	[M-H]-	Dihydrodehydrodiconiferyl alcohol-4-O-glucoside	Lignans and Coumarins	Lignans
mws0097	Negative	357.13	151	358.142	C20H22O6	[M-H]-	9	9	9292.4	15342	9	9	9	9	1934.5	611890	1804300	1007300	358.142	C20H22O6	[M-H]-	Pinoresinol*	Lignans and Coumarins	Lignans
mws1013	Negative	177.02	133.2	178.027	C9H6O4	[M-H]-	9	9	808700	270610	9	9	9	9	9	9	9	9	178.027	C9H6O4	[M-H]-	Esculetin	Lignans and Coumarins	Coumarins
mws1014	Positive	209.04	149.1	208.037	C10H8O5	[M+H]+	9	9	11367	19067	9	9	9	9	9	9	9	10001	208.037	C10H8O5	[M+H]+	Fraxetin (7,8-Dihydroxy-6-methoxycoumarin)	Lignans and Coumarins	Coumarins
mws1015	Negative	339.07	177	340.079	C15H16O9	[M-H]-	32952	11643	11911	4304	26504	36530	15601	26224	13746	52474	68310	64815	340.079	C15H16O9	[M-H]-	Esculin (6,7-DihydroxyCoumarin-6-glucoside)*	Lignans and Coumarins	Coumarins
mws1077	Positive	355.1	193.05	354.095	C16H18O9	[M+H]+	9	9	129100	64996	9	9	9	9	9	9	20284	9	354.095	C16H18O9	[M+H]+	Scopoletin-7-O-glucoside (Scopolin)	Lignans and Coumarins	Coumarins
MWS20152	Negative	417.16	402.1	418.163	C22H26O8	[M-H]-	9	9	9	9	9	9	9	9	9	137300	133600	111990	418.163	C22H26O8	[M-H]-	Syringaresinol	Lignans and Coumarins	Lignans
pmb2723	Negative	485.13	323.2	486.137	C21H26O13	[M-H]-	9	9	9	9	9	9	9	9	9	19856	12933	32578	486.137	C21H26O13	[M-H]-	4-Hydroxycoumarin di-glucoside	Lignans and Coumarins	Coumarins
pme3140	Negative	175.04	131	176.047	C10H8O3	[M-H]-	23233	21803	44329	53820	18097	30989	19276	11465	36713	34646	29947	22124	176.047	C10H8O3	[M-H]-	6-Hydroxy-4-methylcoumarin	Lignans and Coumarins	Coumarins
pmn001368	Negative	699.25	537.2	700.258	C32H44O17	[M-H]-	10272	9	12749	10319	9	9	7216.5	7300	9	6583	9	9	700.258	C32H44O17	[M-H]-	Olivil-4,4'-Di-O-glucoside	Lignans and Coumarins	Lignans
pmn001369	Negative	697.23	535.18	698.242	C32H42O17	[M-H]-	9	9	9	5346.5	6702.2	9	9	9	9	33318	26400	43180	698.242	C32H42O17	[M-H]-	1-Hydroxypineolin Diglucoside	Lignans and Coumarins	Lignans
pmn001370	Negative	681.24	519.19	682.247	C32H42O16	[M-H]-	79417	38390	80888	105190	55605	104680	62289	57630	65786	61680	44758	57836	682.247	C32H42O16	[M-H]-	Pinoresinol-4,4'-O-di-O-glucoside	Lignans and Coumarins	Lignans
pmn001375	Negative	535.18	373.13	536.189	C26H32O12	[M-H]-	343230	175950	236530	326470	563460	319910	247040	306890	363870	4254000	6197700	4408700	536.189	C26H32O12	[M-H]-	1-Hydroxypinoresinol-1-O-Glucoside	Lignans and Coumarins	Lignans
pmn001378	Negative	519.19	357.14	520.194	C26H32O11	[M-H]-	83338	77435	177890	286950	265420	155680	57298	83768	54748	2067100	4413800	2820100	520.194	C26H32O11	[M-H]-	Pinoresinol-4-O-glucoside	Lignans and Coumarins	Lignans
pmp000021	Positive	287.09	203.04	286.084	C16H14O5	[M+H]+	9	9	9	5990.2	9	9	9	9	9	646560	1118500	923110	286.084	C16H14O5	[M+H]+	Isooxypeucedanine	Lignans and Coumarins	Coumarins
pmp000682	Positive	538.22	359.14	520.168	C26H32O11	[M+NH4]+	9	9	9772.5	17196	9	9	9	9	9	9	10500	9	520.168	C26H32O11	[M+NH4]+	Matairesinol-4'-O-glucoside (Matairesinoside)	Lignans and Coumarins	Lignans
Rfmb25702	Negative	561.2	357.13	562.205	C28H34O12	[M-H]-	9	9	8062.5	8137.5	9	9	9	9	9	9	9	9	562.205	C28H34O12	[M-H]-	Pinoresinol-4-O-(6''-acetyl)glucoside	Lignans and Coumarins	Lignans
Rfmb26201	Negative	621.22	417.16	622.226	C30H38O14	[M-H]-	9	9	12737	12612	9	9	9	9	9	9	3517	9	622.226	C30H38O14	[M-H]-	Syringaresinol-4'-O-(6''-acetyl)glucoside	Lignans and Coumarins	Lignans
Zmcn003729	Negative	535.18	373.13	536.189	C26H32O12	[M-H]-	186300	127050	148040	240350	347700	250990	184790	203310	234130	2012100	2583300	2775800	536.189	C26H32O12	[M-H]-	1-Hydroxypinoresinol-4'-O-Glucoside	Lignans and Coumarins	Lignans
Zmdn003480	Negative	537.2	375.15	538.205	C26H34O12	[M-H]-	53880	73684	42654	63213	78005	101420	65375	129040	106570	215160	170110	211630	538.205	C26H34O12	[M-H]-	Cycloolivil-6-O-glucoside	Lignans and Coumarins	Lignans
Zmdn003762	Negative	533.19	311.11	534.195	C23H34O14	[M-H]-	22982	16602	19946	57200	50526	80462	24888	41540	60178	51131	42258	67488	534.195	C23H34O14	[M-H]-	Isosyringinoside	Lignans and Coumarins	Lignans
Zmhn001446	Negative	579.21	417.16	580.216	C28H36O13	[M-H]-	78857	101230	227440	564980	494600	290270	172320	137090	143220	1242700	701950	894790	580.216	C28H36O13	[M-H]-	Syringaresinol-4'-O-glucoside	Lignans and Coumarins	Lignans
Zmxn003874	Negative	585.23	537.21	586.241	C31H38O11	[M-H]-	20931	19957	79428	73576	30100	59838	31361	29682	50248	86921	128060	102960	586.241	C31H38O11	[M-H]-	7,8-Dihydro-Buddlenol B(threo)	Lignans and Coumarins	Lignans
Cmbn007148	Negative	429.12	429.12	430.126	C22H22O9	[M-H]-	9	9	58417	47735	9	9	9	9	11633	9	9	9	430.126	C22H22O9	[M-H]-	1-O-Feruloyl-3-O-caffeoylglycerol	Lipids	Glycerol ester
Hmqp005411	Positive	297.24	81.07	296.234	C18H32O3	[M+H]+	9	9	9	9	9	9	9	9	9	178100	211700	233170	296.234	C18H32O3	[M+H]+	9-Oxo-12Z-Octadecenoic acid*	Lipids	Free fatty acids
Hmqp005455	Positive	297.24	81.07	296.234	C18H32O3	[M+H]+	9	9	9	19862	9	9	9	9	9	172090	182230	241620	296.234	C18H32O3	[M+H]+	15(R)-Hydroxylinoleic Acid*	Lipids	Free fatty acids
Hmqp006023	Positive	326.27	309.27	324.266	C20H36O3	[M+H]+	44939	42705	27398	3973.6	4100.7	3417.8	8348.4	8510.6	5274.9	14960	18221	27050	324.266	C20H36O3	[M+H]+	Ethyl 9-Hydroxy-10,12-octadecadienoic acid	Lipids	Free fatty acids
Hmyn007168	Negative	483.27	255.23	484.278	C22H45O9P	[M-H]-	217480	104280	185820	291310	198820	157010	194190	137030	144040	250090	239420	186710	484.278	C22H45O9P	[M-H]-	LysoPG 16:0	Lipids	Glycerol ester
Lmbn003970	Negative	329.23	211.14	330.241	C18H34O5	[M-H]-	25791	19044	14545	13519	2633	12602	2325.8	3870.8	6376.8	32516	24616	36597	330.241	C18H34O5	[M-H]-	9,12,13-TriHOME; 9(S),12(S),13(S)-Trihydroxy-10(E)-octadecenoic acid	Lipids	Free fatty acids
Lmbn004240	Negative	329.23	199.13	330.241	C18H34O5	[M-H]-	9	9	3524.6	2275.7	9	9	9	9	9	3538.9	3324.2	9	330.241	C18H34O5	[M-H]-	9,10-Dihydroxy-12,13-epoxyoctadecanoic acid	Lipids	Free fatty acids
Lmbn004685	Negative	311.22	223.17	312.23	C18H32O4	[M-H]-	17985	12603	20948	11937	10130	19418	11688	21802	17729	11350	22281	11353	312.23	C18H32O4	[M-H]-	5S,8R-DiHODE; (5S,8R,9Z,12Z)-5,8-Dihydroxyoctadeca-9,12-dienoate	Lipids	Free fatty acids
Lmbn005369	Negative	295.23	195.14	296.235	C18H32O3	[M-H]-	276680	182700	634890	479230	160440	494060	130230	127930	477720	1674400	1435700	1908000	296.235	C18H32O3	[M-H]-	13(S)-HODE;13(S)-Hydroxyoctadeca-9Z,11E-dienoic acid*	Lipids	Free fatty acids
Lmbn005487	Negative	313.24	251.24	314.246	C18H34O4	[M-H]-	10639	8805.7	14998	15356	10833	14546	14984	12660	19715	14355	10829	9959.8	314.246	C18H34O4	[M-H]-	12,13-DHOME; (9Z)-12,13-Dihydroxyoctadec-9-enoic acid	Lipids	Free fatty acids
Lmbn005662	Negative	295.23	171.1	296.235	C18H32O3	[M-H]-	5820.4	2403.1	11398	3662.4	1461.9	7064.8	2096.4	1570.9	7396.5	21734	16140	24956	296.235	C18H32O3	[M-H]-	9(10)-EpOME;(9R,10S)-(12Z)-9,10-Epoxyoctadecenoic acid*	Lipids	Free fatty acids
Lmbn005822	Negative	313.24	223.21	314.246	C18H34O4	[M-H]-	9	9	2959.2	1767.4	9	9	9	9	9	9	9	9	314.246	C18H34O4	[M-H]-	9,10-DHOME; (12Z)-9,10-Dihydroxyoctadec-12-enoic acid	Lipids	Free fatty acids
Lmbn005923	Negative	277.22	59.01	278.225	C18H30O2	[M-H]-	42285	49520	139180	166320	88029	125070	64713	56391	113120	147630	134670	125970	278.225	C18H30O2	[M-H]-	Crepenynic acid	Lipids	Free fatty acids
Lmbn006152	Negative	279.23	59.01	280.24	C18H32O2	[M-H]-	19591	20509	25048	21793	16659	17957	13667	11641	18255	21815	16126	20662	280.24	C18H32O2	[M-H]-	(9Z,11E)-Octadecadienoic acid	Lipids	Free fatty acids
Lmcn009122	Negative	253.22	235.21	254.225	C16H30O2	[M-H]-	8848.7	4819.4	4741	6908.6	3910.9	3498.5	4192.2	6924.1	7190.6	2066.1	2885.3	1640.6	254.225	C16H30O2	[M-H]-	(7Z)-Hexadecenoic acid	Lipids	Free fatty acids
Lmhp007598	Positive	534.36	184.07	533.348	C27H52NO7P	[M+H]+	4999	4450.1	18087	13415	4093.5	16422	5512.5	7018	8037	21868	22666	23366	533.348	C27H52NO7P	[M+H]+	LysoPC 19:2(2n isomer)	Lipids	LPC
Lmhp007840	Positive	534.36	184.07	533.348	C27H52NO7P	[M+H]+	3902.7	2312	8648.8	4273.9	974.62	8070.9	3525.5	1889.4	3669	37419	42076	48076	533.348	C27H52NO7P	[M+H]+	LysoPC 19:2	Lipids	LPC
Lmhp008337	Positive	426.26	285.24	425.254	C19H40NO7P	[M+H]+	2780.6	3103.3	5588	1718.8	2610.8	4233	1409.3	699.7	9	4047.6	4222.6	9	425.254	C19H40NO7P	[M+H]+	LysoPE 14:0(2n isomer)	Lipids	LPE
Lmhp008440	Positive	438.26	297.24	437.254	C20H40NO7P	[M+H]+	9241	12489	22302	8546	8137.1	15365	8087.7	8850.9	6311.4	8523.1	3767.7	5323.5	437.254	C20H40NO7P	[M+H]+	LysoPE 15:1	Lipids	LPE
Lmhp008513	Positive	677.37	261.22	676.367	C33H56O14	[M+H]+	5201.8	9495.7	85136	75216	28852	26205	13157	9519.8	17323	4071.3	2931.8	3864.1	676.367	C33H56O14	[M+H]+	2-α-Linolenoyl-glycerol-1,3-di-O-glucoside*	Lipids	Glycerol ester
Lmhp008589	Positive	476.28	335.26	475.27	C23H42NO7P	[M+H]+	51811	72015	167310	166230	117210	200570	77312	88282	65579	107000	106210	100450	475.27	C23H42NO7P	[M+H]+	LysoPE 18:3(2n isomer)	Lipids	LPE
Lmhp008718	Positive	506.32	184.07	505.317	C25H48NO7P	[M+H]+	15507	24670	40460	31981	29693	35230	28257	29796	28607	32410	27027	28377	505.317	C25H48NO7P	[M+H]+	LysoPC 17:2	Lipids	LPC
Lmhp008744	Positive	677.37	261.22	676.367	C33H56O14	[M+H]+	7259.9	10969	89024	60015	35147	33696	24488	12634	19409	5328.4	927.48	2150.8	676.367	C33H56O14	[M+H]+	1-α-Linolenoyl-glycerol-2,3-di-O-glucoside*	Lipids	Glycerol ester
Lmhp008801	Positive	476.28	335.26	475.27	C23H42NO7P	[M+H]+	40751	60912	149060	154750	119780	185890	77723	76816	76554	85971	85847	87983	475.27	C23H42NO7P	[M+H]+	LysoPE 18:3	Lipids	LPE
Lmhp008833	Positive	494.32	184.07	493.317	C24H48NO7P	[M+H]+	72431	87732	139480	95952	58181	71500	70040	89727	52886	75304	65977	91174	493.317	C24H48NO7P	[M+H]+	LysoPC 16:1(2n isomer)	Lipids	LPC
Lmhp008885	Positive	440.28	299.26	439.27	C20H42NO7P	[M+H]+	47273	58234	82831	54798	39086	46437	28482	33831	31470	80034	88903	111030	439.27	C20H42NO7P	[M+H]+	LysoPE 15:0(2n isomer)	Lipids	LPE
Lmhp009034	Positive	452.28	311.26	451.27	C21H42NO7P	[M+H]+	6078.5	11862	8119.6	8826.6	5440.7	6580.9	3790.1	8592.4	7486.9	7344	5600.4	5972.7	451.27	C21H42NO7P	[M+H]+	LysoPE 16:1	Lipids	LPE
Lmhp009129	Positive	482.32	184.07	481.317	C23H48NO7P	[M+H]+	19741	24130	28179	20348	17226	23290	10692	14376	8402.4	21721	22074	24675	481.317	C23H48NO7P	[M+H]+	LysoPC 15:0(2n isomer)	Lipids	LPC
Lmhp009187	Positive	440.28	299.26	439.27	C20H42NO7P	[M+H]+	43778	59635	77111	53607	42024	41897	25568	41051	31338	98767	84712	87585	439.27	C20H42NO7P	[M+H]+	LysoPE 15:0	Lipids	LPE
Lmhp009384	Positive	679.39	263.24	678.383	C33H58O14	[M+H]+	53262	55062	90573	65843	66631	55122	43003	46049	32635	21103	10548	20489	678.383	C33H58O14	[M+H]+	1-Linoleoylglycerol-2,3-di-O-glucoside*	Lipids	Glycerol ester
Lmhp009464	Positive	466.29	325.27	465.286	C22H44NO7P	[M+H]+	21600	32365	34458	19805	19813	28289	17891	21969	14739	10744	7815	9522.7	465.286	C22H44NO7P	[M+H]+	LysoPE 17:1(2n isomer)	Lipids	LPE
Lmhp009526	Positive	515.32	261.22	514.314	C27H46O9	[M+H]+	1369.7	2308.1	30142	18460	5015.4	4160.4	4787	2060.8	6831.8	3110.4	4289.7	4229.6	514.314	C27H46O9	[M+H]+	2-α-Linolenoyl-glycerol-1-O-glucoside	Lipids	Glycerol ester
Lmhp009590	Positive	508.34	184.07	507.332	C25H50NO7P	[M+H]+	58928	65047	93721	64431	43098	76761	64273	61717	51269	64635	55796	76357	507.332	C25H50NO7P	[M+H]+	LysoPC 17:1	Lipids	LPC
Lmhp009769	Positive	466.29	325.27	465.286	C22H44NO7P	[M+H]+	9089.5	12429	20594	7135.5	7768.1	6949.4	6816.8	9105.4	6128.5	10257	4386	7002.5	465.286	C22H44NO7P	[M+H]+	LysoPE 17:1	Lipids	LPE
Lmhp009773	Positive	515.32	261.22	514.314	C27H46O9	[M+H]+	945.71	2320	25921	19091	4004.9	6034.3	3570.1	3619.7	1863.6	2852.9	3558.3	4821.3	514.314	C27H46O9	[M+H]+	1-α-Linolenoyl-glycerol-3-O-glucoside	Lipids	Glycerol ester
Lmhp009890	Positive	546.36	184.07	545.348	C28H52NO7P	[M+H]+	1891.9	1373.5	11286	7092.8	6376.6	6251.1	2171.4	2767.1	2387.3	6218	11871	7693.3	545.348	C28H52NO7P	[M+H]+	LysoPC 20:3	Lipids	LPC
Lmhp010040	Positive	504.31	363.29	503.301	C25H46NO7P	[M+H]+	9	9	9	9	9	9	9	9	9	9	9	2385.4	503.301	C25H46NO7P	[M+H]+	LysoPE 20:3	Lipids	LPE
Lmhp010190	Positive	522.36	184.07	521.348	C26H52NO7P	[M+H]+	1212000	1547000	2047200	1266500	1035000	1133400	819090	901550	739930	3519800	4507700	4354900	521.348	C26H52NO7P	[M+H]+	LysoPC 18:1(2n isomer)	Lipids	LPC
Lmhp010334	Positive	517.34	263.24	516.33	C27H48O9	[M+H]+	5008.1	6896.8	7163.2	9762.9	6607.1	11479	6935.6	5702.6	6332.9	2686.4	3301.2	3232.7	516.33	C27H48O9	[M+H]+	2-Linoleoylglycerol-1-O-glucoside	Lipids	Glycerol ester
Lmhp010514	Positive	506.32	365.31	505.317	C25H48NO7P	[M+H]+	4076.8	4463.8	8748	3026.6	5961.4	1852	1964	4028.7	2688	2437	2577.2	1881.2	505.317	C25H48NO7P	[M+H]+	LysoPE 20:2(2n isomer)	Lipids	LPE
Lmhp010515	Positive	510.36	184.07	509.348	C25H52NO7P	[M+H]+	16391	19659	32334	23221	18554	28225	13971	10785	10747	41434	55033	50929	509.348	C25H52NO7P	[M+H]+	LysoPC 17:0(2n isomer)	Lipids	LPC
Lmhp010573	Positive	517.34	263.24	516.33	C27H48O9	[M+H]+	3013	4202.6	3287.8	3739.8	2581	2605.4	2513.3	1706.6	1105.5	2156.4	592.73	2340.5	516.33	C27H48O9	[M+H]+	1-Linoleoylglycerol-3-O-glucoside	Lipids	Glycerol ester
Lmhp010757	Positive	506.32	365.31	505.317	C25H48NO7P	[M+H]+	2993.1	3804	8075.3	4143	2570.2	2636.1	3027.6	4107.4	1281.7	3451.7	2199.8	2947.4	505.317	C25H48NO7P	[M+H]+	LysoPE 20:2	Lipids	LPE
Lmhp010908	Positive	536.37	184.07	535.364	C27H54NO7P	[M+H]+	16784	18351	30268	14516	10088	15364	10872	9818.8	7568.3	13616	18055	18911	535.364	C27H54NO7P	[M+H]+	LysoPC 19:1	Lipids	LPC
Lmhp011388	Positive	353.27	261.22	352.261	C21H36O4	[M+H]+	105200	95235	286640	290060	130830	197260	63439	63211	176130	218790	177030	211260	352.261	C21H36O4	[M+H]+	2-α-Linolenoyl-glycerol	Lipids	Glycerol ester
Lmhp011549	Positive	550.39	184.07	549.379	C28H56NO7P	[M+H]+	49123	51977	72592	25347	25326	22702	17830	21373	11520	55906	46166	54580	549.379	C28H56NO7P	[M+H]+	LysoPC 20:1	Lipids	LPC
Lmhp011562	Positive	353.27	261.22	352.261	C21H36O4	[M+H]+	104120	92670	263070	281250	126570	188140	72617	62935	172390	192600	172970	214660	352.261	C21H36O4	[M+H]+	1-α-Linolenoyl-glycerol	Lipids	Glycerol ester
Lmhp012042	Positive	355.28	263.24	354.277	C21H38O4	[M+H]+	213280	190670	233080	206150	162940	182860	97833	85075	197360	242780	157320	200410	354.277	C21H38O4	[M+H]+	2-Linoleoylglycerol	Lipids	Glycerol ester
Lmhp112042	Positive	355.28	263.24	354.277	C21H38O4	[M+H]+	219700	176830	237120	220950	151710	195370	92337	87175	199740	253570	155360	206840	354.277	C21H38O4	[M+H]+	1-Linoleoylglycerol	Lipids	Glycerol ester
Lmqn008288	Negative	299.26	299.26	300.267	C18H36O3	[M-H]-	316310	276940	501710	275570	309670	276050	331610	347430	345820	317130	233480	267500	300.267	C18H36O3	[M-H]-	3-Hydroxyoctadecanoic Acid	Lipids	Free fatty acids
Lmyn005812	Negative	675.36	397.14	676.367	C33H56O14	[M-H]-	40499	45763	434190	264410	98488	143930	78298	71522	80150	8934.4	8662.3	12602	676.367	C33H56O14	[M-H]-	Gingerglycolipid A	Lipids	Glycerol ester
Lmyn006011	Negative	677.38	397.13	678.383	C33H58O14	[M-H]-	174180	232920	207830	176470	176290	155050	163810	136210	74501	61670	35526	59100	678.383	C33H58O14	[M-H]-	Gingerglycolipid B	Lipids	Glycerol ester
Lmyn006221	Negative	679.39	397.13	680.398	C33H60O14	[M-H]-	18533	18198	17099	7591.6	5358.1	7412.3	5538.8	7286.3	3773.8	11801	10680	9598.1	680.398	C33H60O14	[M-H]-	Gingerglycolipid C	Lipids	Glycerol ester
Lmyn007883	Negative	287.22	287.22	288.23	C16H32O4	[M-H]-	9	9	311370	159550	9	9	9	9	32155	9	8640.1	31988	288.23	C16H32O4	[M-H]-	9,16-Dihydroxypalmitic acid	Lipids	Free fatty acids
Lmyn008503	Negative	143.11	143.11	144.115	C8H16O2	[M-H]-	4174	5882.8	5243.7	3313.9	2758.7	3865.8	4291.2	3091.2	4542.4	1807.3	1891.3	2626.5	144.115	C8H16O2	[M-H]-	Octanoic acid	Lipids	Free fatty acids
Lmyn012331	Negative	281.25	281.25	282.256	C18H34O2	[M-H]-	1363800	1421500	1495700	1595800	1172800	839390	618950	1003600	1357600	5940400	4752800	6314700	282.256	C18H34O2	[M-H]-	Petroselinic acid	Lipids	Free fatty acids
mws0119	Negative	227.2	227.2	228.209	C14H28O2	[M-H]-	7811900	7081500	8426200	6496400	7831100	7370000	6604000	7334500	7285300	6786300	6032100	6656400	228.209	C14H28O2	[M-H]-	Myristic Acid	Lipids	Free fatty acids
mws0120	Positive	258.11	104.11	257.103	C8H20NO6P	[M+H]+	19823	24886	111800	5905.4	31390	27063	20875	43870	45350	18787	44643	26527	257.103	C8H20NO6P	[M+H]+	Choline Alfoscerate	Lipids	PC
mws0126	Positive	524.37	184.07	523.364	C26H54NO7P	[M+H]+	479490	626950	927120	682380	649910	790620	466660	542640	516070	1923800	2563000	2625000	523.364	C26H54NO7P	[M+H]+	LysoPC 18:0	Lipids	LPC
mws0289	Positive	480.31	339.29	479.301	C23H46NO7P	[M+H]+	188360	254210	357500	196260	175060	163220	132050	121400	118310	228420	218050	218830	479.301	C23H46NO7P	[M+H]+	LysoPE 18:1	Lipids	LPE
mws0359	Negative	241.22	241.22	242.225	C15H30O2	[M-H]-	244460	171020	218710	184280	198360	185830	136110	175190	203090	245180	196230	298830	242.225	C15H30O2	[M-H]-	Pentadecanoic Acid	Lipids	Free fatty acids
mws0366	Negative	277.22	277.22	278.225	C18H30O2	[M-H]-	3790200	4320000	10467000	12556000	7828800	11618000	6122000	4916400	8317700	10180000	10092000	10036000	278.225	C18H30O2	[M-H]-	γ-Linolenic Acid*	Lipids	Free fatty acids
mws0367	Negative	277.22	277.22	278.225	C18H30O2	[M-H]-	3420500	4168000	10484000	11646000	7999800	11030000	5755100	5027600	8065400	10347000	9144200	8733200	278.225	C18H30O2	[M-H]-	α-Linolenic Acid*	Lipids	Free fatty acids
mws0371	Negative	327.23	283.3	328.24	C22H32O2	[M-H]-	9	2621.3	1260.1	3079.1	1747.4	9	3190.4	9	9	5772.9	3389.1	5582.5	328.24	C22H32O2	[M-H]-	Cis-4,7,10,13,16,19-Docosahexaenoic Acid	Lipids	Free fatty acids
mws0383	Negative	267.23	267.23	268.24	C17H32O2	[M-H]-	287590	304240	292450	319220	195160	235400	155980	177590	238860	565170	341000	449430	268.24	C17H32O2	[M-H]-	10-Heptadecenoic Acid	Lipids	Free fatty acids
MWS0552	Negative	239.2	223.03	240.209	C15H28O2	[M-H]-	228120	282840	336840	348400	246440	279520	238910	290720	297730	410860	153380	137580	240.209	C15H28O2	[M-H]-	Cis-10-Pentadecenoic Acid(C15: 1)	Lipids	Free fatty acids
mws0752	Negative	185.15	185.16	186.162	C11H22O2	[M-H]-	1824500	1605500	1578700	1991900	2047800	1671800	1487700	1889700	1826900	1231900	1135300	1124500	186.162	C11H22O2	[M-H]-	Undecylic Acid	Lipids	Free fatty acids
mws1488	Negative	255.23	237.22	256.24	C16H32O2	[M-H]-	9153.8	10376	9939.8	13995	12593	10049	11768	18881	12668	10649	13831	15330	256.24	C16H32O2	[M-H]-	Palmitic acid	Lipids	Free fatty acids
mws1489	Negative	283.26	283.26	284.272	C18H36O2	[M-H]-	795790	819890	1601100	1459200	1396500	1250900	1036800	1242400	1560000	1302900	806000	763060	284.272	C18H36O2	[M-H]-	Stearic Acid	Lipids	Free fatty acids
mws1491	Negative	279.23	279.23	280.24	C18H32O2	[M-H]-	14716000	11471000	17269000	16580000	12475000	16071000	8526100	9529900	14648000	15953000	12760000	17278000	280.24	C18H32O2	[M-H]-	Linoleic acid	Lipids	Free fatty acids
MWS1816	Negative	183.14	183.14	184.146	C11H20O2	[M-H]-	44696	46461	43231	43372	48998	39856	48896	49117	37914	29260	28468	32894	184.146	C11H20O2	[M-H]-	10-Undecenoic acid	Lipids	Free fatty acids
MWS1900	Negative	215.13	153.13	216.136	C11H20O4	[M-H]-	27527	16179	15687	13317	12662	20862	18471	19995	13955	21828	23515	12563	216.136	C11H20O4	[M-H]-	Undecanedioic acid	Lipids	Free fatty acids
MWS2430	Negative	241.22	241.21	242.225	C15H30O2	[M-H]-	71674	35475	52955	36989	26700	55943	42900	59284	76928	41874	28192	26351	242.225	C15H30O2	[M-H]-	13-methylmyristic acid	Lipids	Free fatty acids
mws2623	Negative	281.25	281.25	282.256	C18H34O2	[M-H]-	1260800	1406200	1518800	1683600	1097300	840550	661180	953870	1294800	5548400	5192700	6367000	282.256	C18H34O2	[M-H]-	11-Octadecanoic acid(Vaccenic acid)	Lipids	Free fatty acids
MWS4295	Negative	299.26	253.25	300.266	C18H36O3	[M-H]-	9398.7	6694.4	8536.8	9546	9264.8	9743.3	9131.6	14029	12149	7958.4	9860	12866	300.266	C18H36O3	[M-H]-	DL-2-hydroxystearic acid	Lipids	Free fatty acids
MWS5231	Negative	243.16	181.16	244.167	C13H24O4	[M-H]-	99090	93195	95762	85448	85723	96181	87626	80588	78484	66707	48250	41717	244.167	C13H24O4	[M-H]-	Tridecanedioic acid	Lipids	Free fatty acids
MWS5235	Negative	299.26	253.25	300.266	C18H36O3	[M-H]-	14676	12688	18591	16620	14219	15122	10255	12605	16443	12741	22384	18428	300.266	C18H36O3	[M-H]-	12-Hydroxyoctadecanoic acid	Lipids	Free fatty acids
MWS80006	Negative	311.22	293.21	312.23	C18H32O4	[M-H]-	8431.9	4185.9	8401.1	9	9	9	9	9	7117.9	123550	157570	164390	312.23	C18H32O4	[M-H]-	9-Hydroperoxy-9Z,11E-Octadecadienoic Acid	Lipids	Free fatty acids
MWSmce549	Positive	303.25	57.07	302.246	C17H34O4	[M+H]+	255760	236390	168720	155910	169600	218910	195640	169540	175310	144440	112430	125970	302.246	C17H34O4	[M+H]+	1-Monomyristin	Lipids	Free fatty acids
MWSmce689	Positive	293.25	95.09	292.24	C19H32O2	[M+H]+	10976	4430.8	27634	20682	3916.4	21230	4107.1	5048.3	23005	25534	14612	19383	292.24	C19H32O2	[M+H]+	Methyl linolenate	Lipids	Free fatty acids
MWSslk132	Negative	285.21	223.21	286.214	C16H30O4	[M-H]-	18232	14662	28543	25152	15380	19259	15022	21022	26356	23578	21892	25213	286.214	C16H30O4	[M-H]-	Hexadecanedioic acid	Lipids	Free fatty acids
MWSslk133	Negative	257.18	195.18	258.183	C14H26O4	[M-H]-	23420	15979	20513	19956	20788	21517	23313	24217	20089	22206	14301	14078	258.183	C14H26O4	[M-H]-	1,14-Tetradecanedioic Acid	Lipids	Free fatty acids
pma1303	Positive	492.31	184.07	491.301	C24H46NO7P	[M+H]+	7494.2	6594	8099.9	12098	6316.9	5600.3	8188.4	10197	3970.9	6350.8	4627.1	6380.6	491.301	C24H46NO7P	[M+H]+	LysoPC 16:2	Lipids	LPC
pmb0296	Positive	357.3	265.4	356.293	C21H40O4	[M+H]+	106310	82724	65946	28756	26028	32830	31032	22565	16970	11607	10358	13353	356.293	C21H40O4	[M+H]+	1-Oleoyl-Sn-Glycerol	Lipids	Glycerol ester
pmb0302	Positive	126.1	96	125.024	C2H8NO3P	[M+H]+	11896	11127	9377.5	11272	4305.8	6020	5148	11147	4304.8	7704.5	11982	5104.5	125.024	C2H8NO3P	[M+H]+	2-Aminoethylphosphonate	Lipids	Glycerol ester
pmb0854	Positive	518.32	184.07	517.317	C26H48NO7P	[M+H]+	253650	481750	972790	1087200	778430	1231300	640880	640730	606230	957950	1206700	974110	517.317	C26H48NO7P	[M+H]+	LysoPC 18:3	Lipids	LPC
pmb0855	Positive	496.34	184.07	495.332	C24H50NO7P	[M+H]+	5536900	7380600	10325000	8167800	6732100	8583800	6082700	5992200	5439700	10844000	11600000	11769000	495.332	C24H50NO7P	[M+H]+	LysoPC 16:0	Lipids	LPC
pmb0856	Positive	480.31	339.29	479.301	C23H46NO7P	[M+H]+	136220	154620	259160	145210	139090	121450	103090	91917	74834	164490	171380	146470	479.301	C23H46NO7P	[M+H]+	LysoPE 18:1(2n isomer)	Lipids	LPE
pmb0863	Positive	492.31	184.07	491.301	C24H46NO7P	[M+H]+	5130.1	5062.6	9485.8	9010	7817.8	8607.9	6074.2	7346.4	7351.8	6460.9	5361.7	4715.9	491.301	C24H46NO7P	[M+H]+	LysoPC 16:2(2n isomer)	Lipids	LPC
pmb0864	Positive	426.26	285.24	425.254	C19H40NO7P	[M+H]+	2162.7	3987.3	6376.4	3365.9	1374.1	3967.4	1633.3	2150.8	1827.7	9	9	9	425.254	C19H40NO7P	[M+H]+	LysoPE 14:0	Lipids	LPE
pmb0865	Positive	518.32	184.07	517.317	C26H48NO7P	[M+H]+	275630	389570	962600	1166600	769270	1363400	709020	681240	605710	953920	1281100	1090600	517.317	C26H48NO7P	[M+H]+	LysoPC 18:3(2n isomer)	Lipids	LPC
pmb0874	Positive	478.29	337.27	477.286	C23H44NO7P	[M+H]+	4427700	6487300	9310200	7384300	6335100	7176400	6177300	6295100	4844700	4895300	4522100	5097800	477.286	C23H44NO7P	[M+H]+	LysoPE 18:2(2n isomer)	Lipids	LPE
pmb0876	Positive	454.29	313.27	453.286	C21H44NO7P	[M+H]+	1505100	1929200	2807600	1798900	1703000	1677400	1317100	1342200	1062800	2549800	2482600	2604300	453.286	C21H44NO7P	[M+H]+	LysoPE 16:0	Lipids	LPE
pmb0881	Positive	478.29	337.27	477.286	C23H44NO7P	[M+H]+	1380000	2392000	3238100	2082200	1849400	2530400	1680600	1776300	1247200	1503000	1290900	1486100	477.286	C23H44NO7P	[M+H]+	LysoPE 18:2	Lipids	LPE
pmb0883	Positive	482.32	341.31	481.317	C23H48NO7P	[M+H]+	49508	53458	80256	57973	49250	45266	39420	39027	33659	176980	198800	200620	481.317	C23H48NO7P	[M+H]+	LysoPE 18:0	Lipids	LPE
pmb0889	Positive	279.23	95.1	278.225	C18H30O2	[M+H]+	110050	81863	323150	162600	54628	206470	68269	52679	198690	1749500	1853100	2149900	278.225	C18H30O2	[M+H]+	Punicic acid (9Z,11E,13Z-octadecatrienoic acid)	Lipids	Free fatty acids
pmb1650	Positive	279.2	149.4	278.225	C18H30O2	[M+H]+	419480	444960	596380	529950	450930	548830	606580	444830	564050	651410	477350	619120	278.225	C18H30O2	[M+H]+	Octadeca-11E,13E,15Z-trienoic acid	Lipids	Free fatty acids
pmb2260	Positive	480.31	184.07	479.301	C23H46NO7P	[M+H]+	14598	17594	19578	29084	14022	17026	15850	14296	7317.4	14706	12363	6771.6	479.301	C23H46NO7P	[M+H]+	LysoPC 15:1	Lipids	LPC
pmb2319	Positive	482.32	184.07	481.317	C23H48NO7P	[M+H]+	251990	277790	410940	290620	210790	324680	156710	219910	206070	250200	230680	279680	481.317	C23H48NO7P	[M+H]+	LysoPC 15:0	Lipids	LPC
pmb2406	Positive	510.36	184.07	509.348	C25H52NO7P	[M+H]+	268900	291630	413100	348510	313040	361580	243320	243640	229240	516280	423310	577470	509.348	C25H52NO7P	[M+H]+	LysoPC 17:0	Lipids	LPC
pmb2640	Negative	199.17	199.17	200.178	C12H24O2	[M-H]-	435570	391650	452760	582170	514290	485320	461130	526690	470520	478200	440140	454770	200.178	C12H24O2	[M-H]-	Dodecanoic acid (Lauric acid)	Lipids	Free fatty acids
pmb2786	Negative	293.21	235.17	294.219	C18H30O3	[M-H]-	1457.5	2180.5	15785	15115	3085.1	959.22	749.52	1744.5	3019.5	7685.2	6735.8	8487.7	294.219	C18H30O3	[M-H]-	9-Hydroxy-10,12,15-octadecatrienoic acid	Lipids	Free fatty acids
pmb2787	Negative	293.21	275.1	294.219	C18H30O3	[M-H]-	12265	10987	31852	22599	8451.8	10730	4321.8	6159.1	14208	46399	40060	54696	294.219	C18H30O3	[M-H]-	9-Oxo-10E,12Z-octadecadienoic acid	Lipids	Free fatty acids
pmb2789	Negative	309	209	310.214	C18H30O4	[M-H]-	7695.7	4755.4	12634	6937.5	9	9	9	9	12766	41913	23715	36145	310.214	C18H30O4	[M-H]-	13S-Hydroperoxy-6Z,9Z,11E-octadecatrienoic acid	Lipids	Free fatty acids
pmb2791	Negative	309.21	209.1	310.1	C18H30O4	[M-H]-	39070	47893	56721	51246	39354	63154	38928	33168	38002	45720	50944	51913	310.1	C18H30O4	[M-H]-	9-Hydroperoxy-10E,12,15Z-octadecatrienoic acid	Lipids	Free fatty acids
pmb2792	Negative	293.21	193.1	294.219	C18H30O3	[M-H]-	167550	199720	161410	202280	207110	214710	173040	172760	182440	179480	171410	186530	294.219	C18H30O3	[M-H]-	13-Hydroxy-6,9,11-octadecatrienoic acid	Lipids	Free fatty acids
pmb2799	Negative	295.23	195.2	296.235	C18H32O3	[M-H]-	17540	15211	30858	23703	7690.3	10620	5251.1	9405.6	8678.7	91891	98347	139100	296.235	C18H32O3	[M-H]-	12,13-Epoxy-9-Octadecenoic Acid*	Lipids	Free fatty acids
pmb2804	Negative	311.1	171.3	312.23	C18H32O4	[M-H]-	13236	10775	192490	31971	7847.1	22959	5347.6	7318.8	21307	471650	573510	673800	312.23	C18H32O4	[M-H]-	13S-Hydroperoxy-9Z,11E-octadecadienoic acid	Lipids	Free fatty acids
pmd0130	Positive	468.31	184.07	467.301	C22H46NO7P	[M+H]+	12347	16820	28143	17281	13186	17610	8748.8	9718.3	11055	18501	16908	15043	467.301	C22H46NO7P	[M+H]+	LysoPC 14:0	Lipids	LPC
pmd0132	Positive	496.34	184.07	495.332	C24H50NO7P	[M+H]+	5344600	7134300	9620500	8304300	6449300	8124800	5881300	5980000	5085000	10424000	10749000	11855000	495.332	C24H50NO7P	[M+H]+	LysoPC 16:0(2n isomer)	Lipids	LPC
pmd0136	Positive	524.37	184.07	523.364	C26H54NO7P	[M+H]+	37086	43963	63992	43362	38572	48765	25761	29214	22824	162600	194820	227920	523.364	C26H54NO7P	[M+H]+	LysoPC 18:0(2n isomer)	Lipids	LPC
pmd0146	Positive	548.37	184.07	547.364	C28H54NO7P	[M+H]+	82896	114820	174800	104600	83464	91937	61134	63293	47724	123240	117910	115790	547.364	C28H54NO7P	[M+H]+	LysoPC 20:2(2n isomer)	Lipids	LPC
pmd0147	Positive	548.37	184.07	547.364	C28H54NO7P	[M+H]+	74714	113020	196730	121600	85063	90750	58867	68012	51430	124580	109880	104940	547.364	C28H54NO7P	[M+H]+	LysoPC 20:2	Lipids	LPC
pmd0160	Positive	454.29	313.27	453.286	C21H44NO7P	[M+H]+	1535000	1795000	2686800	1789700	1603500	1701900	1335600	1216000	1049100	2800900	2402900	2695400	453.286	C21H44NO7P	[M+H]+	LysoPE 16:0(2n isomer)	Lipids	LPE
pme2827	Negative	239	223	240.245	C16H32O	[M-H]-	8120900	7988600	8291700	9000800	9249400	7680500	8688400	9590300	9787200	7455100	7399500	6329500	240.245	C16H32O	[M-H]-	Palmitaldehyde	Lipids	Free fatty acids
pmf0293	Negative	269.29	209.2	270.292	C18H38O	[M-H]-	103220	105730	103310	108930	114460	105820	109570	105570	100430	113410	106440	109460	270.292	C18H38O	[M-H]-	1-Octadecanol	Lipids	Free fatty acids
pmf0297	Negative	297.32	183.1	298.324	C20H42O	[M-H]-	16606	23521	33739	19724	25320	23771	17803	23413	34027	21812	22027	23982	298.324	C20H42O	[M-H]-	1-Eicosanol	Lipids	Free fatty acids
pmf0397	Negative	311.3	183.1	312.303	C20H40O2	[M-H]-	9630.3	29164	31383	30220	37203	11202	8200.7	24617	12835	7882.5	11798	15566	312.303	C20H40O2	[M-H]-	Arachidic acid	Lipids	Free fatty acids
pmf0400	Negative	339.33	183.2	340.334	C22H44O2	[M-H]-	67018	74099	60438	33035	101130	53477	9	49635	87234	35584	9	25597	340.334	C22H44O2	[M-H]-	Docosanoic acid (Behenic acid)	Lipids	Free fatty acids
pmn001610	Negative	307.26	307.3	308.272	C20H36O2	[M-H]-	35279	57752	74366	105530	83792	35591	30101	42035	44579	109670	65787	91994	308.272	C20H36O2	[M-H]-	Eicosadienoic acid	Lipids	Free fatty acids
pmn001686	Negative	287.22	241.22	288.23	C16H32O4	[M-H]-	9	9	4416.1	3437.1	9	9	9	9	9	9	9	9	288.23	C16H32O4	[M-H]-	10,16-Dihydroxypalmitic acid	Lipids	Free fatty acids
pmn001689	Negative	311.22	223.17	312.23	C18H32O4	[M-H]-	9	9	6483.1	4269.4	9	9	9	9	9	9733.4	6677.6	11881	312.23	C18H32O4	[M-H]-	9-Hydroxy-12-oxo-15(Z)-octadecenoic acid	Lipids	Free fatty acids
pmn001691	Negative	327.22	291.2	328.225	C18H32O5	[M-H]-	9	9	22584	25733	9	9	9	9	9	121550	197180	168600	328.225	C18H32O5	[M-H]-	9,12,13-Trihydroxy-10,15-octadecadienoic acid	Lipids	Free fatty acids
pmn001694	Negative	329.23	229.15	330.241	C18H34O5	[M-H]-	134410	87541	241550	157260	63346	127550	48575	61869	98732	2514100	3995900	3560800	330.241	C18H34O5	[M-H]-	9,10,13-Trihydroxy-11-Octadecenoic Acid	Lipids	Free fatty acids
pmp001251	Positive	520.34	184.07	519.332	C26H50NO7P	[M+H]+	7015400	10830000	13929000	11820000	8817800	12310000	9309800	9513500	7505800	10490000	12097000	11618000	519.332	C26H50NO7P	[M+H]+	LysoPC 18:2(2n isomer)	Lipids	LPC
pmp001270	Positive	494.32	184.07	493.317	C24H48NO7P	[M+H]+	71171	106530	126000	92402	67383	68211	61770	85741	55636	75702	49945	90330	493.317	C24H48NO7P	[M+H]+	LysoPC 16:1	Lipids	LPC
pmp001271	Positive	679.39	263.24	678.383	C33H58O14	[M+H]+	64138	78738	108410	58304	65994	46325	52975	44301	32234	24466	11415	20620	678.383	C33H58O14	[M+H]+	1-Linoleoyl-sn-glycerol-diglucoside*	Lipids	Free fatty acids
pmp001273	Positive	520.34	184.07	519.332	C26H50NO7P	[M+H]+	7425300	10645000	13581000	11933000	9255100	12336000	8923400	9573000	7289700	11109000	11831000	11431000	519.332	C26H50NO7P	[M+H]+	LysoPC 18:2	Lipids	LPC
pmp001276	Positive	677.37	677.37	676.367	C33H56O14	[M+H]+	1374700	1733600	1920100	1650400	1154200	522830	1016400	961380	731000	1909600	2450500	2668200	676.367	C33H56O14	[M+H]+	1-Linolenoyl-rac-glycerol-diglucoside	Lipids	Free fatty acids
pmp001281	Positive	522.36	184.07	521.348	C26H52NO7P	[M+H]+	1247800	1688700	1915100	1166600	999620	1086200	827160	856350	770910	3881900	4571100	4751300	521.348	C26H52NO7P	[M+H]+	LysoPC 18:1	Lipids	LPC
pmp001284	Positive	331.28	313.27	330.277	C19H38O4	[M+H]+	56903	72633	57622	52168	53327	81487	67293	62279	62552	48797	54212	51277	330.277	C19H38O4	[M+H]+	Monopalmitin	Lipids	Glycerol ester
Rfmb091	Negative	295.23	195.14	296.235	C18H32O3	[M-H]-	293010	213030	665100	509100	172990	536670	144160	146550	524850	1740000	1434800	1992900	296.235	C18H32O3	[M-H]-	9S-Hydroxy-10E,12Z-octadecadienoic acid*	Lipids	Free fatty acids
YC512118	Positive	282.28	247.24	281.272	C18H35NO	[M+H]+	5599.2	9054.1	11509	2776.2	3261	7950.5	6809.5	10496	8588.5	5597.7	5497.3	4138	281.272	C18H35NO	[M+H]+	Oleamide (9-Octadecenamide)	Lipids	Free fatty acids
Zmpn003368	Negative	293.21	195.14	294.219	C18H30O3	[M-H]-	10507	7342.1	79264	66498	13912	46742	12444	10194	36303	122280	120520	160080	294.219	C18H30O3	[M-H]-	13S-Hydroxy-9Z,11E,15Z-octadecatrienoic acid	Lipids	Free fatty acids
Zmyn004449	Negative	309.21	171.1	310.214	C18H30O4	[M-H]-	3481.9	1898.3	17177	6369.3	2437.5	5795.5	2138.4	2113.3	4982.7	23861	29808	34302	310.214	C18H30O4	[M-H]-	9-Hydroxy-12-oxo-10(E),15(Z)-octadecadienoic acid	Lipids	Free fatty acids
Zmyn004548	Negative	291.2	235.17	292.204	C18H28O3	[M-H]-	3649	1476.6	10267	6527.3	2014.9	9401.8	2745.9	920.4	4603.5	2242.5	2905.3	4286.2	292.204	C18H28O3	[M-H]-	12-Oxo-phytodienoic acid	Lipids	Free fatty acids
Zmyn004676	Negative	293.21	113.1	294.219	C18H30O3	[M-H]-	597520	385370	550610	413000	312620	473410	149120	225180	269570	1227900	1035200	1625200	294.219	C18H30O3	[M-H]-	17-Hydroxylinolenic acid	Lipids	Free fatty acids
Zmyn004732	Negative	293.21	185.12	294.219	C18H30O3	[M-H]-	25464	10422	43202	16264	6563.6	37011	9198.9	4601	13187	386600	296060	332210	294.219	C18H30O3	[M-H]-	2R-hydroxy-9Z,12Z,15Z-octadecatrienoic acid	Lipids	Free fatty acids
Zmyn005026	Negative	283.26	283.26	284.272	C18H36O2	[M-H]-	22478000	24642000	47344000	46050000	41079000	43748000	32555000	35337000	49513000	40255000	26284000	24723000	284.272	C18H36O2	[M-H]-	16-Methylheptadecanoic acid	Lipids	Free fatty acids
Zmyn005252	Negative	285.24	239.24	286.251	C17H34O3	[M-H]-	11239	7808.2	11849	4971.5	7213.1	9412.5	5859.7	8754	8998.7	9066.8	8297.7	7154.4	286.251	C17H34O3	[M-H]-	3-Hydroxy-palmitic acid methyl ester	Lipids	Free fatty acids
Zmyn005384	Negative	299.26	253.26	300.266	C18H36O3	[M-H]-	11466	7177.4	10288	12785	8096.1	12434	9193.8	12395	12810	10893	12981	13293	300.266	C18H36O3	[M-H]-	2R-Hydroxyoctadecanoic Acid	Lipids	Free fatty acids
Zmzn003953	Negative	309.2	227.2	310.214	C18H30O4	[M-H]-	106430	105930	121230	96813	105720	115080	91934	101980	114730	103700	73540	99675	310.214	C18H30O4	[M-H]-	13(s)-hydroperoxy-(9z,11e,15z)-octadecatrienoic acid	Lipids	Free fatty acids
Hmhp001812	Positive	282.12	136.06	281.112	C11H15N5O4	[M+H]+	25401	15048	34810	23058	8873.1	29234	16658	10207	20916	18694	9	21740	281.112	C11H15N5O4	[M+H]+	2'-O-Methyladenosine	Nucleotides and derivatives	Nucleotides and derivatives
Lmcp002302	Positive	312.13	180.09	311.123	C12H17N5O5	[M+H]+	32851	11299	55332	16154	5043.4	10876	3675.3	4455.8	8122.9	14993	9	10703	311.123	C12H17N5O5	[M+H]+	N6-(2-Hydroxyethyl)adenosine	Nucleotides and derivatives	Nucleotides and derivatives
Lmqn000780	Negative	606.08	384.98	607.082	C17H27N3O17P2	[M-H]-	23370	31360	62221	39079	48566	52303	45867	45273	42312	33609	41608	30037	607.082	C17H27N3O17P2	[M-H]-	Uridine 5'-diphospho-N-acetylglucosamine	Nucleotides and derivatives	Nucleotides and derivatives
Lmqp000329	Positive	296.07	104.11	295.056	C8H14N3O7P	[M+H]+	11395	5715.8	43261	25277	16736	16040	17506	21634	22829	13941	19496	22034	295.056	C8H14N3O7P	[M+H]+	5-Aminoimidazole ribonucleotide	Nucleotides and derivatives	Nucleotides and derivatives
ML10180524	Positive	244.09	112.05	243.086	C9H13N3O5	[M+H]+	125430	201390	377310	412000	152300	761290	213010	78327	331980	356920	266200	215910	243.086	C9H13N3O5	[M+H]+	Cytarabine	Nucleotides and derivatives	Nucleotides and derivatives
mws0248	Negative	243.06	110	244.07	C9H12N2O6	[M-H]-	340050	408810	676060	586360	330380	645250	278500	179040	372360	615330	591300	420640	244.07	C9H12N2O6	[M-H]-	Uridine	Nucleotides and derivatives	Nucleotides and derivatives
mws0255	Positive	112.05	95	111.043	C4H5N3O	[M+H]+	38107	41946	61608	30175	48858	126370	40265	42561	54604	77971	75379	68674	111.043	C4H5N3O	[M+H]+	Cytosine	Nucleotides and derivatives	Nucleotides and derivatives
mws0668	Negative	283.07	151	284.076	C10H12N4O6	[M-H]-	17681	19161	365860	260640	18918	33801	14310	18362	41900	25152	28225	57349	284.076	C10H12N4O6	[M-H]-	Xanthosine	Nucleotides and derivatives	Nucleotides and derivatives
mws0724	Negative	298.08	208	299.087	C10H13N5O6	[M-H]-	55892	34596	27143	24607	64233	76713	76674	59315	78777	73416	55556	55676	299.087	C10H13N5O6	[M-H]-	8-Hydroxyguanosine	Nucleotides and derivatives	Nucleotides and derivatives
mws0847	Positive	150.08	133	149.07	C6H7N5	[M+H]+	127080	142530	137060	163190	136010	160550	76307	137540	124370	64396	60951	75978	149.07	C6H7N5	[M+H]+	1-Methyladenine	Nucleotides and derivatives	Nucleotides and derivatives
mws0863	Negative	213.02	97	214.024	C5H11O7P	[M-H]-	153750	69616	72179	46431	82123	39245	60257	41385	60462	51171	56813	48819	214.024	C5H11O7P	[M-H]-	2-Deoxyribose-5'-phosphate	Nucleotides and derivatives	Nucleotides and derivatives
mws0884	Negative	328.05	134.2	329.053	C10H12N5O6P	[M-H]-	55354	78822	130640	101350	46477	57365	44262	31873	60396	38262	34793	40222	329.053	C10H12N5O6P	[M-H]-	Cyclic 3',5'-Adenylic acid	Nucleotides and derivatives	Nucleotides and derivatives
mws0976	Negative	243.06	153	244.07	C9H12N2O6	[M-H]-	43961	47271	47221	52812	28108	38298	38984	20788	31006	57825	56878	32932	244.07	C9H12N2O6	[M-H]-	β-Pseudouridine	Nucleotides and derivatives	Nucleotides and derivatives
mws1060	Negative	267.07	135	268.081	C10H12N4O5	[M-H]-	14856	9	156480	93137	9	9	9288.8	12517	23164	12105	9	33496	268.081	C10H12N4O5	[M-H]-	9-(Arabinosyl)hypoxanthine	Nucleotides and derivatives	Nucleotides and derivatives
mws1409	Negative	578.9	402.6	580.034	C15H22N2O18P2	[M-H]-	9419.5	18262	22992	18055	33397	25288	23100	35182	26224	21644	21164	31906	580.034	C15H22N2O18P2	[M-H]-	Uridine-5'-diphosphoglucuronic acid	Nucleotides and derivatives	Nucleotides and derivatives
MWS2984	Positive	153.05	136.03	152.045	C4H4N6O	[M+H]+	2175.4	9510.2	16964	15660	5887.6	24567	7104.4	5541.1	17755	24137	25165	14190	152.045	C4H4N6O	[M+H]+	8-Azaguanine	Nucleotides and derivatives	Nucleotides and derivatives
MWS4354	Positive	282.12	150.08	281.112	C11H15N5O4	[M+H]+	4905.5	9	9171.5	10997	3056.8	9	9	9	4889.8	9	9	9	281.112	C11H15N5O4	[M+H]+	N6-methyladenosine	Nucleotides and derivatives	Nucleotides and derivatives
MWS5083	Negative	455.1	96.97	456.105	C17H21N4O9P	[M-H]-	61364	45613	100240	100610	70158	91454	72519	83726	75461	230260	339380	285040	456.105	C17H21N4O9P	[M-H]-	Flavin Single Nucleotide(FMN)	Nucleotides and derivatives	Nucleotides and derivatives
MWS5173	Positive	112.05	70.03	111.043	C4H5N3O	[M+H]+	50274	49042	85885	36892	24828	35623	27331	20186	29329	23677	24141	23387	111.043	C4H5N3O	[M+H]+	Isocytosine	Nucleotides and derivatives	Nucleotides and derivatives
MWSslk102	Positive	155.01	119.04	154.005	C5H3ClN4	[M+H]+	10106	7714.2	9505	9537.5	6543.5	7714.2	8935	9	5952.5	2385.5	9	4718.2	154.005	C5H3ClN4	[M+H]+	6-Chloropurine	Nucleotides and derivatives	Nucleotides and derivatives
pmb0374	Positive	136.06	118.9	135.054	C5H5N5	[M+H]+	17772	19885	37321	29235	16644	30134	20306	17318	23910	9	9	9	135.054	C5H5N5	[M+H]+	2-Aminopurine	Nucleotides and derivatives	Nucleotides and derivatives
pmb0530	Positive	664.12	136.2	663.109	C21H27N7O14P2	[M+H]+	63759	115370	129190	141280	187320	161590	118530	119090	124240	79408	94117	89255	663.109	C21H27N7O14P2	[M+H]+	Nicotinic acid adenine dinucleotide	Nucleotides and derivatives	Nucleotides and derivatives
pmb0532	Positive	349.05	137.3	348.047	C10H13N4O8P	[M+H]+	2285.6	6253.4	5179.5	9625.2	13703	5131.3	9	13714	3957.1	9	7102.8	4293.6	348.047	C10H13N4O8P	[M+H]+	Inosine 5'-monophosphate	Nucleotides and derivatives	Nucleotides and derivatives
pmb0981	Positive	348.07	136	347.063	C10H14N5O7P	[M+H]+	35725	66672	56831	64979	155390	52609	60422	101900	43151	42665	52253	37980	347.063	C10H14N5O7P	[M+H]+	Adenosine 5'-monophosphate	Nucleotides and derivatives	Nucleotides and derivatives
pmb2922	Negative	565.05	323.1	566.055	C15H24N2O17P2	[M-H]-	1182000	1438200	1758300	1703900	3124900	2101000	2165500	2936200	1764600	1654300	2267900	1755300	566.055	C15H24N2O17P2	[M-H]-	Uridine 5'-diphospho-D-glucose	Nucleotides and derivatives	Nucleotides and derivatives
pmc0066	Positive	333.05	137.05	332.052	C10H13N4O7P	[M+H]+	2403100	3339300	2331000	694610	1829600	899260	3667600	2189800	1524200	725190	420470	430100	332.052	C10H13N4O7P	[M+H]+	2'-Deoxyinosine-5'-monophosphate	Nucleotides and derivatives	Nucleotides and derivatives
pmc0274	Positive	167.1	121.1	166.031	C6H6N4S	[M+H]+	12115000	11685000	14506000	11172000	7853900	11970000	9462800	12203000	8945400	5562800	5274500	6258700	166.031	C6H6N4S	[M+H]+	6-Methylmercaptopurine	Nucleotides and derivatives	Nucleotides and derivatives
pmc0281	Positive	400.15	136.11	399.139	C15H21N5O8	[M+H]+	14429	5994.9	20292	16062	21811	24072	6144.4	7319.9	11936	22358	9	9	399.139	C15H21N5O8	[M+H]+	Ribosyladenosine	Nucleotides and derivatives	Nucleotides and derivatives
pme0040	Positive	136.06	119	135.054	C5H5N5	[M+H]+	530270	522280	663320	1126700	473330	2833200	1004200	552210	1870300	3810300	3916100	2399000	135.054	C5H5N5	[M+H]+	Adenine	Nucleotides and derivatives	Nucleotides and derivatives
pme0183	Positive	152.06	135	151.049	C5H5N5O	[M+H]+	83874	138960	163980	99134	121710	214140	65985	189380	89816	144720	122450	110010	151.049	C5H5N5O	[M+H]+	Isoguanine	Nucleotides and derivatives	Nucleotides and derivatives
pme0230	Positive	268.1	136.06	267.097	C10H13N5O4	[M+H]+	14922000	18698000	30472000	25331000	13984000	16893000	15893000	10257000	17686000	15206000	11646000	12582000	267.097	C10H13N5O4	[M+H]+	Adenosine	Nucleotides and derivatives	Nucleotides and derivatives
pme0256	Negative	151.03	151	152.033	C5H4N4O2	[M-H]-	9	9	51241	54085	33285	20409	31370	9	9	37607	30477	9	152.033	C5H4N4O2	[M-H]-	Xanthine	Nucleotides and derivatives	Nucleotides and derivatives
pme0257	Negative	111.02	80	112.027	C4H4N2O2	[M-H]-	122500	148360	157390	92428	119070	122440	132260	115370	157040	135010	146270	157070	112.027	C4H4N2O2	[M-H]-	Uracil	Nucleotides and derivatives	Nucleotides and derivatives
pme0264	Positive	243.1	127	242.09	C10H14N2O5	[M+H]+	9	9	8602.5	10733	9	9	9	9	9	9	9	9	242.09	C10H14N2O5	[M+H]+	Thymidine	Nucleotides and derivatives	Nucleotides and derivatives
pme1109	Positive	152.06	135	151.049	C5H5N5O	[M+H]+	80087	96957	197340	178610	70862	315320	109950	38729	179750	295150	297270	190390	151.049	C5H5N5O	[M+H]+	Guanine	Nucleotides and derivatives	Nucleotides and derivatives
pme1119	Positive	269.09	137	268.081	C10H12N4O5	[M+H]+	16763	17896	9820	16146	16188	65886	63438	18450	32856	28376	21712	20376	268.081	C10H12N4O5	[M+H]+	Inosine	Nucleotides and derivatives	Nucleotides and derivatives
pme1184	Positive	268.1	152	267.097	C10H13N5O4	[M+H]+	9	9	16337	9	9	9	9	9	9	9	9	9	267.097	C10H13N5O4	[M+H]+	2'-Deoxyguanosine	Nucleotides and derivatives	Nucleotides and derivatives
pme1194	Positive	228.1	112	227.091	C9H13N3O4	[M+H]+	9	9	16249	9	9	9	9	6485.8	9	9309.7	9	9	227.091	C9H13N3O4	[M+H]+	2'-Deoxycytidine	Nucleotides and derivatives	Nucleotides and derivatives
pme1474	Positive	298.1	136	297.09	C11H15N5O3S	[M+H]+	1167800	1102300	1939200	2650300	2829100	2815200	1512200	1988000	2334200	8323900	17523000	6138400	297.09	C11H15N5O3S	[M+H]+	5'-Deoxy-5'-(methylthio)adenosine	Nucleotides and derivatives	Nucleotides and derivatives
pme2117	Negative	426	159	427.029	C10H15N5O10P2	[M-H]-	62271	58062	46199	80155	318450	112930	148350	312380	47052	56294	112100	80761	427.029	C10H15N5O10P2	[M-H]-	Adenosine 5'-diphosphate	Nucleotides and derivatives	Nucleotides and derivatives
pme2651	Negative	742.1	620.1	743.075	C21H28N7O17P3	[M-H]-	82447	96772	108910	91842	147460	142120	117150	130500	85186	105910	100620	100120	743.075	C21H28N7O17P3	[M-H]-	NADP (Nicotinamide adenine dinucleotide phosphate)	Nucleotides and derivatives	Nucleotides and derivatives
pme3007	Negative	402.99	159	404.002	C9H14N2O12P2	[M-H]-	483900	415510	407380	334020	394540	435170	425190	427800	453860	298440	440130	438700	404.002	C9H14N2O12P2	[M-H]-	Uridine 5'-diphosphate	Nucleotides and derivatives	Nucleotides and derivatives
pme3184	Positive	332.08	136	331.068	C10H14N5O6P	[M+H]+	9	9	9834.5	7899.9	9	9	9	9	9	9	9	6734.5	331.068	C10H14N5O6P	[M+H]+	2'-Deoxyadenosine-5'-monophosphate	Nucleotides and derivatives	Nucleotides and derivatives
pme3188	Negative	323.03	211	324.036	C9H13N2O9P	[M-H]-	21727	29008	76302	67208	35727	15667	8895.7	39412	28153	44060	18278	30724	324.036	C9H13N2O9P	[M-H]-	Uridine 5'-monophosphate	Nucleotides and derivatives	Nucleotides and derivatives
pme3337	Positive	384.12	252	383.108	C14H17N5O8	[M+H]+	92951	78001	159190	149320	147330	163890	116490	136710	158700	661520	850490	747260	383.108	C14H17N5O8	[M+H]+	Succinyladenosine	Nucleotides and derivatives	Nucleotides and derivatives
pme3732	Positive	244.09	112	243.086	C9H13N3O5	[M+H]+	184840	209670	462350	352980	198620	816630	333380	109360	462340	662740	603540	483970	243.086	C9H13N3O5	[M+H]+	Cytidine	Nucleotides and derivatives	Nucleotides and derivatives
pme3961	Positive	252.11	136	251.102	C10H13N5O3	[M+H]+	20268	18461	73680	47493	11956	23071	12921	9160.5	24671	18190	9	25313	251.102	C10H13N5O3	[M+H]+	2'-Deoxyadenosine	Nucleotides and derivatives	Nucleotides and derivatives
pme3967	Positive	312.13	180	311.123	C12H17N5O5	[M+H]+	26518	9041.2	52051	23595	3625.8	9023.2	2842.2	8066.5	9240.5	11760	9783.2	11387	311.123	C12H17N5O5	[M+H]+	2-(Dimethylamino)guanosine	Nucleotides and derivatives	Nucleotides and derivatives
Zmfn000481	Negative	535.04	323.03	536.044	C14H22N2O16P2	[M-H]-	365910	538220	675280	316530	511390	367180	434730	726840	434090	353720	457000	458670	536.044	C14H22N2O16P2	[M-H]-	Uridine-5'-Diphosphate-D-Xylose	Nucleotides and derivatives	Nucleotides and derivatives
Lmbn000193	Negative	103	59.01	104.011	C3H4O4	[M-H]-	36831	9	233550	112360	32816	30510	9	41931	28022	17758	36024	64378	104.011	C3H4O4	[M-H]-	Tartronate semialdehyde	Organic acids	Organic acids
Lmbn000216	Negative	147.03	57.03	148.037	C5H8O5	[M-H]-	225730	212850	271550	376050	377490	514170	310900	302880	393410	737040	926580	833860	148.037	C5H8O5	[M-H]-	3-Methylmalic acid*	Organic acids	Organic acids
Lmbn001288	Negative	131.03	87.04	132.042	C5H8O4	[M-H]-	741560	633040	677730	1368900	1072600	1455100	670290	1109600	1265300	1032100	856020	890690	132.042	C5H8O4	[M-H]-	2-Hydroxy-2-methyl-3-oxobutanoic acid	Organic acids	Organic acids
Lmbn001467	Negative	158.08	116.07	159.09	C7H13NO3	[M-H]-	29121	23156	26225	34443	33768	35301	16267	24022	25843	38273	62749	45227	159.09	C7H13NO3	[M-H]-	5-Acetamidopentanoic Acid	Organic acids	Organic acids
Lmbn001676	Negative	145.05	101.06	146.058	C6H10O4	[M-H]-	31196	32380	36784	37948	53040	61548	40348	35247	40403	76131	58961	66916	146.058	C6H10O4	[M-H]-	3-Hydroxy-3-Methyl-2-Oxopentanoic Acid*	Organic acids	Organic acids
Lmbn001754	Negative	175.06	115.04	176.068	C7H12O5	[M-H]-	6403600	5459000	8130700	6412600	3429600	12345000	6957100	9639300	10904000	14238000	17231000	15658000	176.068	C7H12O5	[M-H]-	3-Isopropylmalic Acid*	Organic acids	Organic acids
Lmbn002072	Negative	159.07	97.07	160.074	C7H12O4	[M-H]-	24872	24355	23562	13490	14780	7603	15284	13892	11400	24803	19371	26920	160.074	C7H12O4	[M-H]-	2-Propylsuccinic acid*	Organic acids	Organic acids
Lmbn003524	Negative	171.1	99.08	172.11	C9H16O3	[M-H]-	14381	16723	25521	23657	25111	21229	15719	13824	13132	30968	25077	30027	172.11	C9H16O3	[M-H]-	9-Oxononanoic acid	Organic acids	Organic acids
Lmgn000160	Negative	131.05	70.03	132.053	C4H8N2O3	[M-H]-	2892800	2840600	2742300	2400100	1890400	1805600	1089300	1915100	1213400	1630400	1618700	2499800	132.053	C4H8N2O3	[M-H]-	3-Ureidopropionic Acid	Organic acids	Organic acids
Lmgn000219	Negative	101.02	55.02	102.032	C4H6O3	[M-H]-	62472	35359	42968	62173	32474	82028	77305	54401	89910	78510	84917	62961	102.032	C4H6O3	[M-H]-	Succinic semialdehyde	Organic acids	Organic acids
Lmgn000224	Negative	145.01	57.03	146.022	C5H6O5	[M-H]-	9	9	161050	65066	17324	9	9	9	9	26910	28350	54952	146.022	C5H6O5	[M-H]-	2-Methyl-3-oxosuccinic acid	Organic acids	Organic acids
Lmgn002555	Negative	173.08	59.01	174.089	C8H14O4	[M-H]-	231790	174190	6022300	4419000	293350	451440	197850	289410	785380	258220	298790	745860	174.089	C8H14O4	[M-H]-	2-Propylglutaric acid	Organic acids	Organic acids
Lmmn000806	Negative	131.03	87.05	132.042	C5H8O4	[M-H]-	742340	589490	702520	1421500	1036500	1367400	665850	1095300	1314300	999410	858490	885730	132.042	C5H8O4	[M-H]-	Dimethylmalonic acid*	Organic acids	Organic acids
Lmmn003323	Negative	271.23	225.22	272.235	C16H32O3	[M-H]-	461370	298590	575450	377280	252770	352580	275320	411630	610590	836050	792010	847560	272.235	C16H32O3	[M-H]-	2-Hydroxyhexadecanoic acid	Organic acids	Organic acids
Lmqp000873	Positive	101.02	55.02	100.018	C4H4O3	[M+H]+	275650	259920	258740	108670	122760	79821	88313	118900	151620	140790	218980	175320	100.018	C4H4O3	[M+H]+	Succinic anhydride	Organic acids	Organic acids
Lmrn002746	Negative	131.07	85.07	132.079	C6H12O3	[M-H]-	46570	18436	89582	73393	26548	24628	26383	32036	40836	37967	30446	43103	132.079	C6H12O3	[M-H]-	2-Hydroxy-4-methylpentanoic acid	Organic acids	Organic acids
Lmtn004049	Negative	263.13	204.12	264.136	C15H20O4	[M-H]-	688430	597880	560680	990560	660110	942530	463340	503230	559510	742170	496290	611550	264.136	C15H20O4	[M-H]-	Abscisic acid	Organic acids	Organic acids
ML10176345	Negative	171.03	109.03	172.037	C7H8O5	[M-H]-	45254	44111	37992	48098	35749	46550	18365	45461	42030	39416	20335	32342	172.037	C7H8O5	[M-H]-	3-Dehydroshikimic acid	Organic acids	Organic acids
mws0154	Negative	173.05	93	174.053	C7H10O5	[M-H]-	700240	594730	614050	819750	797280	1482000	678790	486400	594720	486360	400460	421650	174.053	C7H10O5	[M-H]-	Shikimic acid	Organic acids	Organic acids
mws0159	Negative	163.04	91	164.047	C9H8O3	[M-H]-	127400	108340	675110	268010	23422	60915	20325	54640	101590	74941	83258	95114	164.047	C9H8O3	[M-H]-	Phenylpyruvic acid	Organic acids	Organic acids
mws0192	Negative	117.02	73	118.027	C4H6O4	[M-H]-	84223000	74795000	90833000	38134000	36014000	37693000	26667000	46610000	44071000	49254000	65644000	50246000	118.027	C4H6O4	[M-H]-	Succinic acid*	Organic acids	Organic acids
mws0208	Negative	145.05	101	146.058	C6H10O4	[M-H]-	375160	242410	326430	486910	417950	684060	309320	513930	475750	540800	715640	491310	146.058	C6H10O4	[M-H]-	Adipic Acid	Organic acids	Organic acids
mws0237	Negative	187.1	125	188.105	C9H16O4	[M-H]-	609240	476760	963570	419460	358730	533470	434220	539360	460760	2001900	1831400	3109800	188.105	C9H16O4	[M-H]-	Azelaic acid	Organic acids	Organic acids
mws0242	Negative	173.08	111	174.089	C8H14O4	[M-H]-	49914	38694	61471	30288	22862	43160	33044	44616	35216	13972	42576	30928	174.089	C8H14O4	[M-H]-	Suberic Acid	Organic acids	Organic acids
mws0262	Negative	149.01	87	150.016	C4H6O6	[M-H]-	177090	193160	188080	142250	132690	142050	160590	180130	148990	150500	210670	222400	150.016	C4H6O6	[M-H]-	L-Tartaric acid	Organic acids	Organic acids
MWS0274	Negative	165.06	119.05	166.063	C9H10O3	[M-H]-	16377	18776	351340	251990	24471	34818	18273	25253	68634	32937	28597	56750	166.063	C9H10O3	[M-H]-	DL-3-Phenyllactic acid	Organic acids	Organic acids
mws0275	Negative	133.01	71.01	134.022	C4H6O5	[M-H]-	1288500	1539100	1393600	1335500	1550500	1931900	1461100	1502300	1476100	1952500	1737900	1822500	134.022	C4H6O5	[M-H]-	L-Malic acid	Organic acids	Organic acids
mws0277	Negative	191.06	85	192.063	C7H12O6	[M-H]-	7257600	4507800	5673100	4064500	4941100	9384400	10408000	9012900	8484000	7391800	9122500	5908300	192.063	C7H12O6	[M-H]-	Quinic Acid	Organic acids	Organic acids
mws0281	Negative	191.02	111.01	192.027	C6H8O7	[M-H]-	24505000	20256000	24143000	17644000	19801000	37488000	26011000	28257000	35550000	33986000	37267000	29630000	192.027	C6H8O7	[M-H]-	Citric Acid*	Organic acids	Organic acids
mws0341	Negative	131.07	85	132.079	C6H12O3	[M-H]-	9	66753	231250	194000	9	9	9	81588	72080	108340	74729	113690	132.079	C6H12O3	[M-H]-	2-Hydroxyisocaproic acid	Organic acids	Organic acids
mws0376	Negative	115	71	116.011	C4H4O4	[M-H]-	880370	749320	998510	729860	721500	788220	673770	605890	790960	977390	628730	788320	116.011	C4H4O4	[M-H]-	Fumaric acid	Organic acids	Organic acids
mws0470	Negative	117.02	73	118.027	C4H6O4	[M-H]-	83576000	73715000	89594000	38735000	36153000	38089000	27924000	45897000	45317000	48106000	64853000	50088000	118.027	C4H6O4	[M-H]-	Methylmalonic acid*	Organic acids	Organic acids
mws0473	Negative	131.03	87.05	132.042	C5H8O4	[M-H]-	6698400	5553700	6037300	11943000	9479600	12689000	5896300	9833600	11047000	8960400	7335100	7702500	132.042	C5H8O4	[M-H]-	2-Methylsuccinic acid*	Organic acids	Organic acids
mws0567	Positive	146.09	87	145.085	C5H11N3O2	[M+H]+	34581	22392	66139	75345	56743	94441	19096	22756	44749	91830	130210	128090	145.085	C5H11N3O2	[M+H]+	4-Guanidinobutyric acid	Organic acids	Organic acids
mws0574	Negative	103.04	57.03	104.047	C4H8O3	[M-H]-	9	9	11901	9	9	9	9	9	9	9	9	9	104.047	C4H8O3	[M-H]-	2-Hydroxyisobutyric acid	Organic acids	Organic acids
mws0576	Negative	103.04	59.1	104.047	C4H8O3	[M-H]-	345350	257450	2065700	1138900	138870	215900	138490	135770	337470	222210	273620	406820	104.047	C4H8O3	[M-H]-	3-Hydroxybutyric acid	Organic acids	Organic acids
MWS0811	Positive	130.09	84.08	129.079	C6H11NO2	[M+H]+	2760200	2122100	3819300	2696700	1922200	2768200	1365600	1033600	1361400	591700	544550	1270700	129.079	C6H11NO2	[M+H]+	L-Pipecolic Acid	Organic acids	Organic acids
mws0851	Negative	143.11	143.11	144.115	C8H16O2	[M-H]-	1658300	1603100	1652800	1667100	1605100	1583900	1467500	1724000	1564000	1066600	956180	910420	144.115	C8H16O2	[M-H]-	Valproic Acid	Organic acids	Organic acids
mws1598	Negative	138.02	79.96	139.03	C3H9NO3S	[M-H]-	2420.5	4391.2	2430.5	7897.2	3380.5	1965.8	4382	2438.8	1970.5	4335.8	3379.2	3440.5	139.03	C3H9NO3S	[M-H]-	3-Amino-1-propionic sulfonic acid	Organic acids	Organic acids
MWS1882	Negative	132.03	88.04	133.038	C4H7NO4	[M-H]-	8652700	7642200	8752500	12425000	12286000	3875400	4623200	7638300	5216500	6560100	4643300	8126800	133.038	C4H7NO4	[M-H]-	Iminodiacetic acid	Organic acids	Organic acids
MWS1962	Positive	153.13	83.05	152.12	C10H16O	[M+H]+	60608	55511	64244	119220	64458	109650	74300	69807	93817	173100	195620	211980	152.12	C10H16O	[M+H]+	cis-Citral	Organic acids	Organic acids
mws2125	Negative	166.98	78.7	167.982	C3H5O6P	[M-H]-	4356	12913	47233	14476	114920	14645	47848	63157	13036	10496	7631.2	14986	167.982	C3H5O6P	[M-H]-	Phosphoenolpyruvate	Organic acids	Organic acids
MWS3036	Negative	147.03	85.03	148.037	C5H8O5	[M-H]-	58090	53547	87766	57087	62951	112160	103910	85554	89453	74144	68488	70249	148.037	C5H8O5	[M-H]-	3-Hydroxyglutaric acid	Organic acids	Organic acids
mws4052	Positive	102.06	56.05	101.048	C4H7NO2	[M+H]+	65580	80576	76870	70980	105460	109350	63885	88544	104820	67959	92563	72562	101.048	C4H7NO2	[M+H]+	1-Aminocyclopropane-1-carboxylic acid	Organic acids	Organic acids
MWS5136	Negative	145.05	101.06	146.058	C6H10O4	[M-H]-	37665	36391	29380	57091	53548	65294	36072	53271	45194	60223	89551	45909	146.058	C6H10O4	[M-H]-	Mono-Methyl Glutarate*	Organic acids	Organic acids
MWS5238	Positive	165.09	91.05	164.084	C10H12O2	[M+H]+	9	9	175250	150820	9	9	9	9	30782	9	9	32601	164.084	C10H12O2	[M+H]+	4-Phenylbutyric acid	Organic acids	Organic acids
MWSslk154	Positive	277.13	115.04	276.121	C12H20O7	[M+H]+	5064.4	3063	5543.7	4138	3301.9	3791.1	3631.3	3722.6	5370.3	8485.1	5963.1	5306.9	276.121	C12H20O7	[M+H]+	Triethyl citrate	Organic acids	Organic acids
pmb2657	Negative	289.1	97.1	290.123	C10H18N4O6	[M-H]-	78798	68456	120360	117560	81256	361560	98704	80530	152670	125840	116290	94996	290.123	C10H18N4O6	[M-H]-	Argininosuccinic acid	Organic acids	Organic acids
pmb2826	Negative	147.03	87.1	148.037	C5H8O5	[M-H]-	239250	201730	315140	445260	291460	628750	174310	262090	524800	1170300	1584500	1733400	148.037	C5H8O5	[M-H]-	L-Citramalic acid*	Organic acids	Organic acids
pmb3099	Negative	153.03	125	154.039	C4H11O4P	[M-H]-	36725	28131	32155	23952	20704	26463	18959	19825	20480	18864	21308	21274	154.039	C4H11O4P	[M-H]-	Diethyl phosphate	Organic acids	Organic acids
pmb3101	Negative	175.06	115	176.068	C7H12O5	[M-H]-	7402500	5943500	8484600	6787900	3893000	14061000	7080600	10090000	10873000	14475000	17302000	16453000	176.068	C7H12O5	[M-H]-	2-Isopropylmalic Acid*	Organic acids	Organic acids
pme0120	Positive	118.09	101	117.079	C5H11NO2	[M+H]+	8584.2	9388.5	12585	14187	13852	16900	4054.2	2732.5	18794	4680	8347	3748.2	117.079	C5H11NO2	[M+H]+	5-Aminovaleric acid	Organic acids	Organic acids
pme0243	Negative	131.03	87.05	132.042	C5H8O4	[M-H]-	60963	21783	137060	117440	80698	141910	74846	79217	98051	94221	98182	96141	132.042	C5H8O4	[M-H]-	Glutaric acid*	Organic acids	Organic acids
pme0274	Positive	132.1	69	131.095	C6H13NO2	[M+H]+	5287500	5176500	5114000	4969600	4586900	6980900	4170400	4420200	3617000	3556100	3053500	4033200	131.095	C6H13NO2	[M+H]+	6-Aminocaproic acid	Organic acids	Organic acids
pme0278	Positive	191.1	128	190.095	C7H14N2O4	[M+H]+	41048	18258	29015	33450	45084	42443	20255	29700	47049	42951	64468	66293	190.095	C7H14N2O4	[M+H]+	2,6-Diaminooimelic acid	Organic acids	Organic acids
pme1216	Negative	122.03	78	123.032	C6H5NO2	[M-H]-	629250	642290	859390	570650	419840	239650	230070	462840	234100	363140	379530	361660	123.032	C6H5NO2	[M-H]-	2-Picolinic acid	Organic acids	Organic acids
pme1730	Negative	117	59	118.027	C4H6O4	[M-H]-	41213	23508	38950	35189	28020	33104	40674	33270	45116	68194	37103	35384	118.027	C4H6O4	[M-H]-	D-Erythronolactone	Organic acids	Organic acids
pme1974	Negative	87.01	43	88.016	C3H4O3	[M-H]-	97209	94554	104860	60550	50571	101200	81600	43306	90263	65592	60883	107110	88.016	C3H4O3	[M-H]-	Pyruvic acid	Organic acids	Organic acids
pme1975	Negative	103	59	104.06	C3H4O4	[M-H]-	281170	260420	2064000	1128700	143130	188970	210550	186610	385210	296470	262530	351150	104.06	C3H4O4	[M-H]-	Malonic acid	Organic acids	Organic acids
pme2380	Negative	145.01	101	146.022	C5H6O5	[M-H]-	62391	43886	1736000	1001100	143330	134260	124050	109720	265540	280590	423900	453670	146.022	C5H6O5	[M-H]-	α-Ketoglutaric acid	Organic acids	Organic acids
pme2550	Negative	173.02	137	174.016	C6H6O6	[M-H]-	263630	263780	175480	317500	309690	690090	322890	238590	250890	226810	163450	174180	174.016	C6H6O6	[M-H]-	Cis-Aconitic acid	Organic acids	Organic acids
pme2589	Negative	159.1	87	160.037	C6H8O5	[M-H]-	81256	56004	44364	39592	39040	18512	9196.5	37484	15851	36785	33509	19469	160.037	C6H8O5	[M-H]-	2-Oxoadipic acid	Organic acids	Organic acids
pme3011	Positive	104.07	68.8	103.063	C4H9NO2	[M+H]+	32662	46736	71975	63439	44037	46881	40475	30311	21357	29283	42381	18065	103.063	C4H9NO2	[M+H]+	γ-Aminobutyric acid	Organic acids	Organic acids
pme3017	Positive	104.07	58	103.063	C4H9NO2	[M+H]+	962470	960270	1310500	799550	852530	1318000	680150	734570	973870	851370	783150	932170	103.063	C4H9NO2	[M+H]+	2-Aminoisobutyric acid	Organic acids	Organic acids
pme3096	Negative	118	74	119.022	C3H5NO4	[M-H]-	3127200	2791400	3239900	1378200	1288900	1300600	991650	1632000	1594600	1740600	2325500	1857300	119.022	C3H5NO4	[M-H]-	Aminomalonic acid	Organic acids	Organic acids
pme3186	Negative	169	79	169.998	C3H7O6P	[M-H]-	197290	185870	161200	253270	315320	205000	225120	241400	254700	158320	210170	191990	169.998	C3H7O6P	[M-H]-	DL-Glyceraldehyde-3-phosphate	Organic acids	Organic acids
pmf0420	Negative	149.06	74.9	150.068	C9H10O2	[M-H]-	4093300	3880000	3538400	3237600	3397100	3548900	2901600	3304800	3119400	2798300	2724900	2838400	150.068	C9H10O2	[M-H]-	Benzyl acetate	Organic acids	Organic acids
Rfmb320	Positive	144.1	84.08	143.095	C7H13NO2	[M+H]+	54454	29825	56848	64096	38163	127510	32871	32554	71895	70450	102950	60537	143.095	C7H13NO2	[M+H]+	1-Methylpiperidine-2-carboxylic acid	Organic acids	Organic acids
Wmzn000227	Negative	145.06	109.04	146.058	C6H10O4	[M-H]-	31659	42021	36872	24655	35054	4274	8931.5	21299	4064	19507	14618	27782	146.058	C6H10O4	[M-H]-	2,2-Dimethylsuccinic acid	Organic acids	Organic acids
Zmgn000216	Negative	125	78.96	126.008	C2H7O4P	[M-H]-	88836	65987	95206	115800	132460	145990	143630	122010	116570	152920	140000	279660	126.008	C2H7O4P	[M-H]-	2-Hydroxyethylphosphonic acid	Organic acids	Organic acids
Zmgn000217	Negative	129.02	85.03	130.027	C5H6O4	[M-H]-	168070	176220	248610	100990	80874	157450	114180	93029	100850	107530	107910	106870	130.027	C5H6O4	[M-H]-	Methylenesuccinic acid	Organic acids	Organic acids
Zmgn000503	Negative	133.05	71.01	134.058	C5H10O4	[M-H]-	2008500	1775000	1882900	1807700	1791700	2329700	2146300	2177000	2263700	2124900	2073400	2107600	134.058	C5H10O4	[M-H]-	2,3-Dihydroxy-3-Methylbutanoic Acid	Organic acids	Organic acids
Zmgn001448	Negative	175.06	115.04	176.068	C7H12O5	[M-H]-	6748600	5966200	7948000	6638700	3586500	13697000	7225300	9484800	10838000	14461000	17129000	16686000	176.068	C7H12O5	[M-H]-	2-Propylmalic Acid*	Organic acids	Organic acids
Zmjn001813	Negative	159.07	97.06	160.074	C7H12O4	[M-H]-	21821	8855	27305	21230	11511	18927	17066	12338	15167	29061	40327	36333	160.074	C7H12O4	[M-H]-	Pimelic acid*	Organic acids	Organic acids
Zmpn000638	Negative	130.05	88.04	131.069	C4H9N3O2	[M-H]-	55700	57479	76092	87808	103250	147310	106330	106610	102210	89263	125500	88516	131.069	C4H9N3O2	[M-H]-	3-Guanidinopropionic acid	Organic acids	Organic acids
Zmtn001464	Negative	204.03	160.04	205.038	C10H7NO4	[M-H]-	48622	54643	68041	27907	28523	12646	48228	51430	27346	32556	30927	24829	205.038	C10H7NO4	[M-H]-	4,8-Dihydroxyquinoline-2-carboxylic acid	Organic acids	Organic acids
Zmyn000453	Negative	191.02	111.01	192.027	C6H8O7	[M-H]-	8165400	6775500	7693500	6060700	6677400	9217000	10518000	10125000	10405000	8170500	9524600	8092200	192.027	C6H8O7	[M-H]-	Isocitric Acid*	Organic acids	Organic acids
Zmyn002323	Negative	151.04	107.05	152.047	C8H8O3	[M-H]-	7201.5	9	22559	13544	9	19386	12970	15196	11504	7093.8	8881.5	9	152.047	C8H8O3	[M-H]-	2-Hydroxyphenylacetic acid	Organic acids	Organic acids
Cmsp003083	Positive	521.2	131.05	520.194	C26H32O11	[M+H]+	32214	26917	38864	70684	35712	83114	48076	30508	41112	76790	151490	136300	520.194	C26H32O11	[M+H]+	Dehydrodiconiferyl alcohol-4-O-glucoside	Others	Others
Hmcn000192	Negative	209.07	59.01	210.073	C7H14O7	[M-H]-	348400	222590	315160	365660	436340	484300	379940	463510	489180	652260	814080	706520	210.073	C7H14O7	[M-H]-	Sedoheptulose	Others	Saccharides and Alcohols
Hmfn000531	Negative	175.02	87.01	176.032	C6H8O6	[M-H]-	236550	160080	252420	238470	119420	163170	102590	158770	177560	178680	129330	187160	176.032	C6H8O6	[M-H]-	L-Ascorbic acid (Vitamin C)	Others	Vitamin
Hmgn002833	Negative	371.11	297.11	372.12	C20H20O7	[M-H]-	9	149.22	5611.5	4643.5	9	9	9	9	2770.2	95068	139270	121650	372.12	C20H20O7	[M-H]-	4-Ketopinoresinol	Others	Others
Hmln000297	Negative	179.05	59.01	180.063	C6H12O6	[M-H]-	414200	529580	574680	490880	440140	546900	674400	657980	787200	565420	532380	643480	180.063	C6H12O6	[M-H]-	Inositol*	Others	Saccharides and Alcohols
Lmbn000198	Negative	133.01	71.01	134.022	C4H6O5	[M-H]-	1570500	1630100	1351500	1262300	1716900	1809400	1691200	1711800	1412400	1870900	1748700	2124700	134.022	C4H6O5	[M-H]-	3-Dehydro-L-Threonic Acid	Others	Saccharides and Alcohols
Lmbp000668	Positive	124.04	78.03	123.032	C6H5NO2	[M+H]+	307830	381890	422730	269130	220250	90140	153350	194980	194730	226550	290190	220820	123.032	C6H5NO2	[M+H]+	Isonicotinic acid*	Others	Vitamin
Lmmn000214	Negative	487.17	341.11	488.174	C18H32O15	[M-H]-	340140	231650	313540	244950	316800	74780	159300	153680	109720	168200	260000	216850	488.174	C18H32O15	[M-H]-	Solatriose	Others	Saccharides and Alcohols
Lmqn000351	Negative	325.11	59.01	326.121	C12H22O10	[M-H]-	47777	69842	76480	38948	39776	125040	43098	108840	77778	86170	65746	78599	326.121	C12H22O10	[M-H]-	Rutinose	Others	Saccharides and Alcohols
Lmqn000432	Negative	333.06	333.06	334.067	C9H19O11P	[M-H]-	147030	438450	843780	559400	323230	341560	237720	199030	451850	458770	336760	498870	334.067	C9H19O11P	[M-H]-	1-(sn-Glycero-3-phospho)-1D-myo-inositol	Others	Saccharides and Alcohols
Lmsn000381	Negative	341.11	89.02	342.116	C12H22O11	[M-H]-	4291800	2942200	4285300	3414000	2656200	2943000	7397400	3694500	4153100	3030800	7700500	3455100	342.116	C12H22O11	[M-H]-	D-Maltose*	Others	Saccharides and Alcohols
Lmzp003064	Positive	333.19	153.13	332.184	C16H28O7	[M+H]+	8337.2	3219.8	6386	19927	12804	26070	9036.8	9039.5	9063.2	8201.8	16044	4344.1	332.184	C16H28O7	[M+H]+	(3R,4S,6R)-p-Menth-1-ene-3,6-diol-3-O-β-D-glucoside	Others	Others
MA10039492	Negative	173.01	71.03	174.016	C6H6O6	[M-H]-	604530	607130	532120	499420	688350	708500	621990	460420	695330	486550	399680	391480	174.016	C6H6O6	[M-H]-	Dehydroascorbic acid	Others	Vitamin
MA10039641	Negative	341.11	89.02	342.116	C12H22O11	[M-H]-	12111000	19652000	14401000	17504000	14414000	4874700	7969400	10471000	13212000	10257000	5770800	9176400	342.116	C12H22O11	[M-H]-	Lactobiose*	Others	Saccharides and Alcohols
ML10171848	Negative	147.03	85.03	148.037	C5H8O5	[M-H]-	70856	59603	88756	83038	75120	96678	162260	172900	143250	292720	430670	474020	148.037	C5H8O5	[M-H]-	D-Arabinono-1,4-lactone	Others	Saccharides and Alcohols
ML10175762	Positive	105.07	77.04	104.063	C8H8	[M+H]+	11325	4892.6	1395100	1223700	5558.7	4927.4	11157	9549.5	346030	10597	3999.6	286910	104.063	C8H8	[M+H]+	Styrene	Others	Others
mws0213	Negative	151.06	71	152.068	C5H12O5	[M-H]-	33542	34312	25724	66114	71644	42136	24810	24208	31384	61401	62422	46140	152.068	C5H12O5	[M-H]-	Ribitol*	Others	Saccharides and Alcohols
mws0214	Negative	181.07	71	182.079	C6H14O6	[M-H]-	9998100	11186000	10395000	8275800	9471600	6417100	15912000	13431000	11863000	9630100	12999000	10774000	182.079	C6H14O6	[M-H]-	D-Sorbitol*	Others	Saccharides and Alcohols
mws0232	Positive	377.15	243	376.138	C17H20N4O6	[M+H]+	9112	11339	50999	57544	9148.8	18945	11367	3794.5	19751	155160	245050	225420	376.138	C17H20N4O6	[M+H]+	Riboflavin (Vitamin B2)	Others	Vitamin
mws0264	Negative	341.11	119	342.116	C12H22O11	[M-H]-	3017300	1377000	2101500	1994600	3367800	1786700	4712200	1982800	3506400	2092500	3546600	1726600	342.116	C12H22O11	[M-H]-	D-Trehalose*	Others	Saccharides and Alcohols
mws0344	Negative	165.04	75	166.048	C5H10O6	[M-H]-	4949700	6138900	5751100	6058200	4561300	4914000	3539100	4060600	7389600	7651100	7237500	9604900	166.048	C5H10O6	[M-H]-	D-Xylonic acid	Others	Saccharides and Alcohols
mws0437	Negative	151.06	71	152.068	C5H12O5	[M-H]-	29424	17974	19381	28368	29284	29684	15136	31371	23750	28437	25767	16230	152.068	C5H12O5	[M-H]-	D-Arabitol*	Others	Saccharides and Alcohols
MWS0442	Positive	527.16	365.1	504.169	C18H32O16	[M+Na]+	9	23387	27082	64189	41949	70969	34022	25293	44471	73294	96444	91243	504.169	C18H32O16	[M+Na]+	Maltotriose*	Others	Saccharides and Alcohols
MWS0559	Negative	161.05	71.01	162.053	C6H10O5	[M-H]-	916260	815920	870140	764620	779820	1258800	1158100	970940	1487000	1495100	1306600	1296100	162.053	C6H10O5	[M-H]-	1,6-anhydro-β-D-glucose	Others	Saccharides and Alcohols
mws0854	Negative	163	59.01	164.068	C6H12O5	[M-H]-	90109	114490	46137	80362	57656	63405	100120	73734	76810	103040	156280	127240	164.068	C6H12O5	[M-H]-	Rhamnose	Others	Saccharides and Alcohols
mws0866	Negative	259.02	97	260.03	C6H13O9P	[M-H]-	2860500	3292900	3862600	3390900	3295300	2771000	2256100	3386500	2781900	2613800	3956100	3723900	260.03	C6H13O9P	[M-H]-	D-Glucose 6-phosphate*	Others	Saccharides and Alcohols
mws0889	Negative	135.03	75.01	136.037	C4H8O5	[M-H]-	1298300	1387100	1504300	980680	779650	706750	681720	811720	656260	842960	856360	956790	136.037	C4H8O5	[M-H]-	D-Threonic Acid	Others	Saccharides and Alcohols
mws1038	Negative	277.12	146	278.13	C11H22N2O4S	[M-H]-	26202	84090	92074	28058	58769	63166	32168	101120	68471	9	7969.2	9	278.13	C11H22N2O4S	[M-H]-	Pantetheine	Others	Others
mws1080	Negative	341.11	179	342.116	C12H22O11	[M-H]-	537540	504690	654770	613800	467620	494900	856230	516060	721340	451520	718990	511560	342.116	C12H22O11	[M-H]-	Galactinol*	Others	Saccharides and Alcohols
mws1089	Negative	421.1	241	422.083	C12H23O14P	[M-H]-	769190	575610	461330	1052400	1130000	202730	638180	763760	584580	635690	508100	578000	422.083	C12H23O14P	[M-H]-	Sucrose-6-phosphate	Others	Saccharides and Alcohols
mws1090	Negative	259.02	97	260.03	C6H13O9P	[M-H]-	2790200	3643500	4066800	3471000	3297600	2791200	2337800	3480300	2758800	2990200	4062000	3617300	260.03	C6H13O9P	[M-H]-	Glucose-1-phosphate*	Others	Saccharides and Alcohols
mws1155	Negative	181.07	101.02	182.079	C6H14O6	[M-H]-	8092900	7927400	6933100	7099300	7635800	5639400	13630000	12701000	10117000	8539300	10295000	9959700	182.079	C6H14O6	[M-H]-	D-Mannitol*	Others	Saccharides and Alcohols
mws1164	Negative	179.06	59.01	180.063	C6H12O6	[M-H]-	433270	530800	566710	464640	382110	545630	563120	402580	470560	701380	662950	496080	180.063	C6H12O6	[M-H]-	D-Fructose*	Others	Saccharides and Alcohols
mws1189	Negative	193.04	72.8	194.033	C6H10O7	[M-H]-	374520	417930	327430	338230	332930	405480	368230	309340	356320	555380	628310	832260	194.033	C6H10O7	[M-H]-	D-Galacturonic acid*	Others	Saccharides and Alcohols
mws1333	Negative	341.11	113	342.116	C12H22O11	[M-H]-	1478400	1410800	1725000	1730200	1776600	2708500	3298700	2255200	2259000	2098600	2839700	2616300	342.116	C12H22O11	[M-H]-	Melibiose*	Others	Saccharides and Alcohols
mws1337	Positive	220.12	202.1	219.111	C9H17NO5	[M+H]+	1290100	1169200	1508600	1439000	1204300	2064700	1281800	1424400	1607800	1521900	1372200	1360600	219.111	C9H17NO5	[M+H]+	D-Pantothenic Acid	Others	Vitamin
mws1499	Negative	149.05	59.01	150.053	C5H10O5	[M-H]-	673920	467290	586890	558150	520660	795970	831810	632190	873600	972220	864580	816010	150.053	C5H10O5	[M-H]-	D-Arabinose*	Others	Saccharides and Alcohols
mws1589	Negative	503.16	179	504.169	C18H32O16	[M-H]-	131930	180610	57285	111670	47918	24444	37518	44044	40059	98098	56581	41755	504.169	C18H32O16	[M-H]-	D-Panose*	Others	Saccharides and Alcohols
mws1611	Positive	191.11	117.07	190.099	C12H14O2	[M+H]+	2811.3	7477.9	110410	87250	22334	11285	9053.2	5732	25473	81351	86260	90746	190.099	C12H14O2	[M+H]+	Z-Ligustilide	Others	Others
MWS1983	Negative	343.12	89.03	344.132	C12H24O11	[M-H]-	1214800	835720	900730	566920	1053300	703540	1652700	1243700	1259400	1242300	1824300	1200300	344.132	C12H24O11	[M-H]-	Maltitol	Others	Saccharides and Alcohols
mws2104	Negative	193.07	99.01	194.079	C7H14O6	[M-H]-	58808	48042	47412	71927	52519	58120	43373	71260	102610	105370	100380	112130	194.079	C7H14O6	[M-H]-	D-Pinitol	Others	Saccharides and Alcohols
mws2523	Negative	421.08	241.1	422.083	C12H23O14P	[M-H]-	131620	145100	144210	289070	255710	59429	163630	216960	150070	155960	134500	146860	422.083	C12H23O14P	[M-H]-	Trehalose 6-phosphate	Others	Saccharides and Alcohols
mws2608	Positive	222.1	84.05	221.09	C8H15NO6	[M+H]+	392640	432450	458970	617580	432470	567970	453330	485150	539900	802710	844670	811840	221.09	C8H15NO6	[M+H]+	N-Acetyl-D-galactosamine	Others	Saccharides and Alcohols
mws4163	Negative	665.21	485.3	666.222	C24H42O21	[M-H]-	9	4735.5	9	6551.5	9	9	9	9	9	9	9	9	666.222	C24H42O21	[M-H]-	Nystose	Others	Saccharides and Alcohols
mws4170	Negative	179.06	59.01	180.063	C6H12O6	[M-H]-	542430	568380	577950	429820	402770	643540	724520	378960	535590	709040	787720	580390	180.063	C6H12O6	[M-H]-	D-Glucose*	Others	Saccharides and Alcohols
mws4174	Positive	222.1	138	221.09	C8H15NO6	[M+H]+	110700	113550	76032	65521	89522	38718	82198	96647	115390	98998	129980	82618	221.09	C8H15NO6	[M+H]+	N-Acetyl-D-mannosamine	Others	Saccharides and Alcohols
MWS4305	Negative	119.04	59.01	120.042	C4H8O4	[M-H]-	6674100	7709700	8700000	5362000	7146700	5624700	6095200	6514800	5888200	5819900	5626000	8625600	120.042	C4H8O4	[M-H]-	Erythrose	Others	Saccharides and Alcohols
mws5038	Negative	341.11	89.02	342.116	C12H22O11	[M-H]-	4987800	3898900	3453300	5382800	7441700	3798100	6302500	3884400	5598000	2974600	5661400	3369600	342.116	C12H22O11	[M-H]-	Isomaltulose*	Others	Saccharides and Alcohols
MWSmce165	Negative	165.08	59.02	166.084	C6H14O5	[M-H]-	1108000	1082700	885900	999550	940170	1022900	1041600	1138300	1337000	1512200	1947800	1733000	166.084	C6H14O5	[M-H]-	L-Fucitol	Others	Saccharides and Alcohols
MWSmce199	Negative	149.05	59.02	150.053	C5H10O5	[M-H]-	529960	528920	520750	494160	471430	656220	695170	609050	913910	965790	767480	716120	150.053	C5H10O5	[M-H]-	L-Xylose*	Others	Saccharides and Alcohols
MWSmce274	Negative	123.05	93.04	124.052	C7H8O2	[M-H]-	9	9	1710400	1707500	9	9	9	9	185580	9	9	158880	124.052	C7H8O2	[M-H]-	Salicyl Alcohol	Others	Others
MWSmce674	Positive	451.36	89.06	450.35	C31H46O2	[M+H]+	15593	18217	15979	12028	16748	14553	16249	16579	13775	14868	14496	16149	450.35	C31H46O2	[M+H]+	Phylloquinone (Vitamin K1)	Others	Vitamin
MWSmce690	Negative	175.02	59.01	176.032	C6H8O6	[M-H]-	260100	181950	213720	157020	142540	343220	184340	158790	145920	211330	148480	201930	176.032	C6H8O6	[M-H]-	Erythorbic Acid; Isoascorbic Acid	Others	Vitamin
MWSmce700	Positive	109.07	94.05	108.069	C6H8N2	[M+H]+	9	9	56670	40938	9	9	9	9	9	9	9	9	108.069	C6H8N2	[M+H]+	2-Ethylpyrazine	Others	Others
pma1751	Positive	286.09	124	285.085	C12H15NO7	[M+H]+	1635000	1107400	1210100	1156700	850260	659470	554950	1403200	855290	2847000	5457600	3764300	285.085	C12H15NO7	[M+H]+	N-(beta-D-Glucosyl)nicotinate	Others	Vitamin
pma3101	Positive	256.08	124.1	256.082	C11H14NO6+	[M]+	391760	314270	401820	409390	603490	876420	436820	447770	592550	735540	893690	850770	256.082	C11H14NO6+	[M]+	Nicotinate D-ribonucleoside	Others	Vitamin
pma6455	Negative	229.01	96.97	230.02	C5H11O8P	[M-H]-	234780	247660	305880	241080	249330	181770	131340	259390	192240	270540	259570	254080	230.02	C5H11O8P	[M-H]-	Ribulose-5-phosphate	Others	Saccharides and Alcohols
pmb0789	Positive	332.13	152.07	331.127	C14H21NO8	[M+H]+	13629	10386	40313	28993	12044	18483	8453.9	14048	16404	19332	16995	18804	331.127	C14H21NO8	[M+H]+	Pyridoxine-5'-O-glucoside	Others	Vitamin
pmb0801	Positive	346.11	184.1	345.106	C14H19NO9	[M+H]+	19569	15964	23538	28194	25261	43228	23727	30065	35468	42080	9	9	345.106	C14H19NO9	[M+H]+	4-Pyridoxic acid-O-glucoside	Others	Vitamin
pmb2653	Negative	649.1	145	650.227	C24H42O20	[M-H]-	9	9	111880	34649	9	9	9	9	9	9	9	7197.5	650.227	C24H42O20	[M-H]-	DMelezitose O-rhamnoside	Others	Saccharides and Alcohols
pmb3079	Negative	300.05	96.9	301.056	C8H16NO9P	[M-H]-	102440	112120	189860	198030	233010	68889	117680	145110	183130	169680	127600	170680	301.056	C8H16NO9P	[M-H]-	N-Acetyl-D-glucosamine-1-phosphate	Others	Saccharides and Alcohols
pmb3081	Negative	289	97	290.004	C6H11PO11	[M-H]-	8627400	8173200	8634800	10633000	11449000	12410000	10030000	10457000	17863000	10902000	11665000	10406000	290.004	C6H11PO11	[M-H]-	Glucarate O-Phosphoric acid	Others	Saccharides and Alcohols
pme0490	Positive	124.04	78	123.032	C6H5NO2	[M+H]+	288560	356880	458190	258680	183260	85467	146170	201220	195480	201600	269170	194890	123.032	C6H5NO2	[M+H]+	Nicotinic acid (Vitamin B3)*	Others	Vitamin
pme0513	Negative	151.06	59	152.068	C5H12O5	[M-H]-	12974	9	19988	33263	21408	22335	21874	23519	26942	22354	11554	18697	152.068	C5H12O5	[M-H]-	Xylitol*	Others	Saccharides and Alcohols
pme0519	Negative	341.11	119.03	342.116	C12H22O11	[M-H]-	2501300	1535500	2067700	2126700	3067600	2108000	3286700	3382000	4039200	2151000	2557000	1829500	342.116	C12H22O11	[M-H]-	D-Sucrose*	Others	Saccharides and Alcohols
pme0534	Negative	195.05	74.9	196.058	C6H12O7	[M-H]-	2993400	2597800	2552400	2746200	2740200	2213600	2905300	2750300	3374300	4736800	8768600	7974000	196.058	C6H12O7	[M-H]-	Gluconic acid	Others	Saccharides and Alcohols
pme1014	Positive	445.3	341.3	444.303	C31H40O2	[M+H]+	43257	48082	45210	43582	52437	57892	52879	53257	58050	40032	26478	30813	444.303	C31H40O2	[M+H]+	Menatetrenone (Vitamin K2)	Others	Vitamin
pme1021	Negative	177.14	99	178.048	C6H10O6	[M-H]-	143250	140570	157920	106930	74375	201520	223350	196390	257400	239320	223180	248500	178.048	C6H10O6	[M-H]-	D-Glucono-1,5-lactone	Others	Saccharides and Alcohols
pme1383	Positive	170.08	134.1	169.074	C8H11NO3	[M+H]+	1561300	1316300	1728500	1231800	1530700	2190200	811330	1176400	1521600	1251000	1347200	1034700	169.074	C8H11NO3	[M+H]+	Pyridoxine	Others	Vitamin
pme2125	Negative	503.16	179	504.169	C18H32O16	[M-H]-	128690	466970	217170	267780	223590	69105	110550	68208	127020	151410	187590	84475	504.169	C18H32O16	[M-H]-	Raffinose*	Others	Saccharides and Alcohols
pme2134	Negative	121	59	122.058	C4H10O4	[M-H]-	2190300	2488900	2811700	2460400	2288200	2072300	1976800	2222800	2390700	2147300	2284100	2614700	122.058	C4H10O4	[M-H]-	D-Threitol	Others	Saccharides and Alcohols
pme2165	Negative	155.01	111	156.017	C5H4N2O4	[M-H]-	25286	21182	44676	18020	18592	16460	27893	46632	29106	17612	36597	53926	156.017	C5H4N2O4	[M-H]-	Orotic acid (Vitamin B13)	Others	Vitamin
pme2237	Negative	181.07	101	182.079	C6H14O6	[M-H]-	25150000	24488000	21401000	22525000	21566000	18952000	34637000	32736000	30816000	25455000	27588000	26483000	182.079	C6H14O6	[M-H]-	Dulcitol*	Others	Saccharides and Alcohols
pme2253	Negative	177.04	59	178.048	C6H10O6	[M-H]-	69105	56599	57970	63120	41324	46614	90338	83025	90978	68321	96698	90485	178.048	C6H10O6	[M-H]-	L-Gulono-1,4-Lactone	Others	Saccharides and Alcohols
pme2266	Positive	245.1	227	244.088	C10H16N2O3S	[M+H]+	68281	49895	58401	69918	54610	118810	51294	55465	102400	53856	56593	58561	244.088	C10H16N2O3S	[M+H]+	Biotin	Others	Vitamin
pme2435	Negative	163	59	164.068	C6H12O5	[M-H]-	112140	129530	105420	50064	91616	41456	104830	92677	88034	119710	199370	107290	164.068	C6H12O5	[M-H]-	L-Fucose	Others	Saccharides and Alcohols
pme2529	Negative	163.2	101	164.068	C6H12O5	[M-H]-	320340	284360	221560	213120	259310	211400	284600	311590	302140	339400	440130	392970	164.068	C6H12O5	[M-H]-	1,5-Anhydro-D-glucitol	Others	Saccharides and Alcohols
pme2596	Positive	184.06	148	183.053	C8H9NO4	[M+H]+	33234	31540	24930	26121	16919	33451	23022	20440	38174	51454	9	53294	183.053	C8H9NO4	[M+H]+	4-Pyridoxic acid	Others	Vitamin
pme2755	Positive	222	144	221.09	C8H15NO6	[M+H]+	380490	362860	449180	566580	472000	548940	462530	483850	496220	733060	858910	832290	221.09	C8H15NO6	[M+H]+	N-Acetyl-D-glucosamine	Others	Saccharides and Alcohols
pme3163	Negative	289	97	290.04	C7H15O10P	[M-H]-	5510200	5514400	5819000	7196500	8220300	7641700	6100900	6593900	11064000	8233000	8284800	6832300	290.04	C7H15O10P	[M-H]-	D-Sedoheptuiose 7-phosphate	Others	Saccharides and Alcohols
pme3311	Negative	339	97	339.996	C6H14O12P2	[M-H]-	53267	60062	54029	101490	69814	84874	75142	67216	97030	49194	96445	88140	339.996	C6H14O12P2	[M-H]-	D-Fructose-1,6-biphosphate	Others	Saccharides and Alcohols
pme3313	Negative	259	97	260.03	C6H13O9P	[M-H]-	2951100	3883000	4096100	3461700	4807000	1839000	2158300	2709400	3357300	3200000	3820400	3631200	260.03	C6H13O9P	[M-H]-	D-Fructose 6-phosphate*	Others	Saccharides and Alcohols
pme3705	Negative	193.04	73	194.043	C6H10O7	[M-H]-	468950	404310	392300	304080	344670	399670	363410	351470	456190	546140	624140	703110	194.043	C6H10O7	[M-H]-	D-Glucoronic acid*	Others	Saccharides and Alcohols
pmf0138	Negative	179.06	59	180.063	C6H12O6	[M-H]-	499510	561830	627820	370090	387780	644290	609960	535260	773420	556970	583210	565300	180.063	C6H12O6	[M-H]-	D-Mannose*	Others	Saccharides and Alcohols
pmf0139	Negative	179.06	59	180.063	C6H12O6	[M-H]-	397000	535600	511810	441770	376570	584120	659550	426440	608460	468150	711520	574530	180.063	C6H12O6	[M-H]-	D-Galactose*	Others	Saccharides and Alcohols
pmf0174	Negative	157.16	157.2	158.167	C10H22O	[M-H]-	9611000	9325800	9236400	9381100	10125000	9813300	9880100	9230100	9537700	1695300	1396800	1245500	158.167	C10H22O	[M-H]-	1-Decanol*	Others	Saccharides and Alcohols
pmf0175	Negative	157.16	157.2	158.167	C10H22O	[M-H]-	10080000	9766700	9226800	9865300	10637000	9937800	10067000	10168000	9967400	2566500	2085200	2293400	158.167	C10H22O	[M-H]-	2-Decanol*	Others	Saccharides and Alcohols
pmf0319	Negative	195.07	137	196.074	C10H12O4	[M-H]-	9	9	3075	9	9649.5	7801.2	9	6006.5	9	9316.8	4881.5	9	196.074	C10H12O4	[M-H]-	Acetosyringone	Others	Others
pmn001423	Negative	385.19	223.13	386.194	C19H30O8	[M-H]-	95675	104250	166400	87330	87959	51933	88598	157800	79701	388870	578020	722340	386.194	C19H30O8	[M-H]-	Roseoside	Others	Others
pmp000971	Positive	301.07	286.05	300.063	C16H12O6	[M+H]+	9	4061.5	1608.9	4863	9	2746.4	1879.8	9	18972	9	9	3748.2	300.063	C16H12O6	[M+H]+	6-Demethoxy-7-methylcapillarisin	Others	Others
Zmdp000376	Positive	130.09	84.08	129.09	C5H11N3O	[M+H]+	3982800	3094800	5123000	2707400	2879000	3193900	1792100	1631800	1845800	1473200	1266800	2314000	129.09	C5H11N3O	[M+H]+	4-Guanidinobutanal	Others	Others
Zmgn000173	Negative	149.05	75.01	150.053	C5H10O5	[M-H]-	557500	315330	466240	307210	181270	486890	280920	445240	333180	517410	453690	677280	150.053	C5H10O5	[M-H]-	D-Ribose*	Others	Saccharides and Alcohols
Zmgn000447	Negative	184.98	78.96	185.993	C3H7O7P	[M-H]-	215580	308450	415160	464230	614020	267010	357270	349080	341380	310960	325290	332320	185.993	C3H7O7P	[M-H]-	3-Phospho-D-glyceric acid	Others	Saccharides and Alcohols
Zmjp000624	Positive	168.06	150.05	167.058	C8H9NO3	[M+H]+	12305	12214	30223	29022	21253	35125	22844	18389	31625	33864	46232	31471	167.058	C8H9NO3	[M+H]+	Pyridoxal	Others	Vitamin
Zmpn000095	Negative	261.04	78.96	262.045	C6H15O9P	[M-H]-	195290	181260	206350	283620	240980	226840	249330	300060	288000	209920	372340	268670	262.045	C6H15O9P	[M-H]-	Sorbitol-6-phosphate	Others	Saccharides and Alcohols
Zmpn000199	Negative	209.03	85.03	210.038	C6H10O8	[M-H]-	648690	451340	491360	702520	614030	835600	495530	653740	745290	1069300	1282000	1316200	210.038	C6H10O8	[M-H]-	D-Galactaric acid*	Others	Saccharides and Alcohols
Zmyn000083	Negative	338.99	78.96	339.996	C6H14O12P2	[M-H]-	70436	69431	86030	169770	139050	205800	108480	165020	161250	102370	127430	88896	339.996	C6H14O12P2	[M-H]-	D-Glucose 1,6-bisphosphate	Others	Saccharides and Alcohols
Zmyn000108	Negative	209.03	85.03	210.038	C6H10O8	[M-H]-	662890	502780	456490	777120	662690	916970	477840	624960	749940	1047100	1517700	1324500	210.038	C6H10O8	[M-H]-	D-Saccharic acid*	Others	Saccharides and Alcohols
Zmyn000110	Negative	258.04	78.96	259.046	C6H14NO8P	[M-H]-	2819.7	3852.6	8694.3	7631.7	2427.1	2794.6	2803.3	4599.1	2788	4202.4	7090.6	6367.7	259.046	C6H14NO8P	[M-H]-	D-Glucosamine 1-phosphate	Others	Saccharides and Alcohols
Zmyn000230	Negative	147.03	57.03	148.037	C5H8O5	[M-H]-	311450	206070	347640	331860	227120	601020	313650	339980	446090	805350	995280	997760	148.037	C5H8O5	[M-H]-	2-Dehydro-3-deoxy-L-arabinonate	Others	Saccharides and Alcohols
Zmzn000078	Negative	168.99	78.96	169.998	C3H7O6P	[M-H]-	223880	171890	171520	175210	329140	518490	258770	306180	192260	96596	176690	197890	169.998	C3H7O6P	[M-H]-	Dihydroxyacetone phosphate	Others	Saccharides and Alcohols
Zmzn000079	Negative	199	78.96	200.009	C4H9O7P	[M-H]-	31222	41976	51777	47988	46861	40623	39502	63761	36333	42917	52972	52024	200.009	C4H9O7P	[M-H]-	D-Erythrose-4-phosphate	Others	Saccharides and Alcohols
Zmzp006646	Positive	317.07	302.04	316.058	C16H12O7	[M+H]+	9	9	17600	6750.1	9	9	9	9	3369.9	9	9	9	316.058	C16H12O7	[M+H]+	Capillarisin	Others	Others
Cmjn004337	Negative	401.14	269.1	402.153	C18H26O10	[M-H]-	9	9	10406	9	9	9	9	9	9	6631	4602.5	9	402.153	C18H26O10	[M-H]-	Benzyl-(2''-O-xylosyl)glucoside	Phenolic acids	Phenolic acids
Cmsn005615	Negative	229.09	123.04	230.094	C14H14O3	[M-H]-	9	9	5299.5	7021.5	9	9	9	9	9	9	9	9	230.094	C14H14O3	[M-H]-	3,3',5-Trihydroxybibenzyl	Phenolic acids	Phenolic acids
Cmsp002787	Positive	227.09	181.05	226.084	C11H14O5	[M+H]+	18871	8920.8	15774	9411	18332	30387	5591.2	16432	21466	28615	23204	21713	226.084	C11H14O5	[M+H]+	3,4'-Dihydroxy-3',5'-dimethoxypropiophenone	Phenolic acids	Phenolic acids
Cmyp005062	Positive	407.13	245.08	406.126	C20H22O9	[M+H]+	9	9	40804	45427	9	9	9	9	5047.5	59724	100820	96541	406.126	C20H22O9	[M+H]+	Salireposide	Phenolic acids	Phenolic acids
Cmyp005063	Positive	425.18	147.04	424.173	C21H28O9	[M+H]+	9	9	107540	66717	9	9	9	9	15036	9	9	9624	424.173	C21H28O9	[M+H]+	Grandidentatin	Phenolic acids	Phenolic acids
HJAP048	Positive	213.07	195.07	212.068	C10H12O5	[M+H]+	9	9	268580	195560	9	9	9	9	38028	9	9	9	212.068	C10H12O5	[M+H]+	2,4,5-Trimethoxybenzoic acid	Phenolic acids	Phenolic acids
HJAP104	Positive	107.05	77.04	106.041	C7H6O	[M+H]+	65891	58044	3701400	2466200	64528	53208	9	57073	164370	113930	58962	168010	106.041	C7H6O	[M+H]+	Benzaldehyde	Phenolic acids	Phenolic acids
HJN003	Negative	385.11	223.06	386.122	C17H22O10	[M-H]-	68435	47044	81888	63613	46552	23084	54998	64499	61911	157280	242600	272410	386.122	C17H22O10	[M-H]-	1-O-Sinapoyl-D-glucose	Phenolic acids	Phenolic acids
HJN037	Negative	183.03	124.02	184.037	C8H8O5	[M-H]-	19236	11892	21050	81901	44676	9303	85957	156790	9	9	5289	46341	184.037	C8H8O5	[M-H]-	4-O-Methylgallic Acid*	Phenolic acids	Phenolic acids
HJN102	Negative	677.17	515.14	678.158	C34H30O15	[M-H]-	10303	9	9	9745	15278	9	7863	9607.2	5537	57018	82187	88798	678.158	C34H30O15	[M-H]-	3,4,5-Tricaffeoylquinic acid	Phenolic acids	Phenolic acids
Hmbn004039	Negative	441.14	145.03	442.148	C20H26O11	[M-H]-	9	9	100030	76466	9	9	9	9	13407	9	9	9	442.148	C20H26O11	[M-H]-	Regaloside B	Phenolic acids	Phenolic acids
Hmbn005951	Negative	383.12	163.04	384.121	C21H20O7	[M-H]-	9	9	9	7345.7	9	9	9	9	9	9	9	9	384.121	C21H20O7	[M-H]-	1,3-O-Di-p-Coumaroylglycerol	Phenolic acids	Phenolic acids
Hmbp006861	Positive	445.15	177.05	444.142	C23H24O9	[M+H]+	9	9	9	12830	9	9	9	9	9	3895.1	5734.9	4239.3	444.142	C23H24O9	[M+H]+	1,2-O-Diferuloylglycerol*	Phenolic acids	Phenolic acids
Hmgn001653	Negative	137.02	93.04	138.032	C7H6O3	[M-H]-	162240	88198	177990	140490	27860	70867	26129	99208	72220	72673	61706	45843	138.032	C7H6O3	[M-H]-	Protocatechualdehyde	Phenolic acids	Phenolic acids
Hmhn003518	Negative	355.1	175.04	356.111	C16H20O9	[M-H]-	283430	238550	1540000	1997100	2135200	948720	1108600	1841800	1169500	18498000	32427000	31113000	356.111	C16H20O9	[M-H]-	4-O-β-D-glucopyranosylferulic acid*	Phenolic acids	Phenolic acids
Hmln002149	Negative	623.2	461.17	624.205	C29H36O15	[M-H]-	9	9	24241	36364	9	9	9	5225	9	9	9	8944.5	624.205	C29H36O15	[M-H]-	Acteoside	Phenolic acids	Phenolic acids
Hmln002597	Negative	193.05	161.02	216.04	C10H9NaO4	[M-Na]-	8778.5	1624.1	32987	43115	7812.9	4199.7	4922.3	2259.7	4543	278430	266480	274400	216.04	C10H9NaO4	[M-Na]-	Sodium ferulate	Phenolic acids	Phenolic acids
Hmln002806	Negative	335.08	179.03	336.085	C16H16O8	[M-H]-	126870	35826	1586100	1140400	302610	25952	96186	53010	211080	1229200	10090000	2201500	336.085	C16H16O8	[M-H]-	5-O-Caffeoylshikimic acid	Phenolic acids	Phenolic acids
Hmln003529	Negative	401.15	269.11	402.152	C18H26O10	[M-H]-	9	9	9707.5	10414	9	9	9	9	9	5309	9	3951	402.152	C18H26O10	[M-H]-	Benzyl β-primeveroside	Phenolic acids	Phenolic acids
Hmqn000843	Negative	301.09	123.01	302.1	C13H18O8	[M-H]-	463830	483310	575150	689900	970000	606110	673270	886810	637530	652780	957020	833070	302.1	C13H18O8	[M-H]-	Tachioside	Phenolic acids	Phenolic acids
Hmsn001911	Negative	301.09	139.04	302.1	C13H18O8	[M-H]-	41390	20841	39836	39239	56453	72208	42271	52060	60373	54340	30473	54332	302.1	C13H18O8	[M-H]-	Idesin	Phenolic acids	Phenolic acids
Hmsn002272	Negative	327.11	165.05	328.116	C15H20O8	[M-H]-	9	9	9	65501	9	9	9	9	9	9	9	9	328.116	C15H20O8	[M-H]-	Demethyl coniferin	Phenolic acids	Phenolic acids
Hmsn002598	Negative	301.09	139.04	302.1	C13H18O8	[M-H]-	9	9	299470	348830	9	10192	6011.5	9	56551	23770	9	88207	302.1	C13H18O8	[M-H]-	Salirepin	Phenolic acids	Phenolic acids
Hmsn002948	Negative	417.14	109.03	418.148	C18H26O11	[M-H]-	9	9	43866	35662	9	5634	9	9	7971	9	9	9	418.148	C18H26O11	[M-H]-	2-Hydroxyphenol-1-O-glucosyl(6→1)rhamnoside	Phenolic acids	Phenolic acids
Hmsn003897	Negative	439.13	111.04	440.132	C20H24O11	[M-H]-	9	9	121830	54727	9	9	9	9	19601	9	9	17301	440.132	C20H24O11	[M-H]-	Idescarpin	Phenolic acids	Phenolic acids
Hmtn001120	Negative	315.11	153.06	316.116	C14H20O8	[M-H]-	1138000	847120	813520	1268500	1110000	1668600	1013500	1018400	1372000	2028700	2254200	2411600	316.116	C14H20O8	[M-H]-	5-(2-Hydroxyethyl)-2-O-glucosylphenol	Phenolic acids	Phenolic acids
Hmtn001288	Negative	181.05	135.04	182.058	C9H10O4	[M-H]-	9	3744	18261	27261	9	9	9	9	5381	9	9	8042	182.058	C9H10O4	[M-H]-	Methyl 2,4-dihydroxyphenylacetate	Phenolic acids	Phenolic acids
Jmwn002620	Negative	341.09	161.02	342.095	C15H18O9	[M-H]-	1675100	459730	5042600	6173000	1552500	248900	690110	1157600	1356100	9278700	15645000	12422000	342.095	C15H18O9	[M-H]-	Vanillic Acid-4-O-Glucuronide	Phenolic acids	Phenolic acids
Li512113	Negative	451.09	391.04	452.095	C20H20O12	[M-H]-	111630	100960	104230	105550	118760	57182	93674	109100	92413	39251	43216	47956	452.095	C20H20O12	[M-H]-	Maleoyl-caffeoylquinic acid	Phenolic acids	Phenolic acids
Li512115	Negative	515.12	353.09	516.127	C25H24O12	[M-H]-	310800	137740	404670	410930	694530	218670	342200	204320	259840	7314200	9077100	9110500	516.127	C25H24O12	[M-H]-	Isochlorogenic acid B*	Phenolic acids	Phenolic acids
Lman002731	Negative	341.09	135.04	342.095	C15H18O9	[M-H]-	146840	117500	94159	125760	208250	246510	91541	74497	120390	1148300	1590300	1389600	342.095	C15H18O9	[M-H]-	Grevilloside F	Phenolic acids	Phenolic acids
Lman003972	Negative	433.11	161.03	434.121	C21H22O10	[M-H]-	9	7199	14737	14293	9	7178.8	9	9	9	9	9	7122.5	434.121	C21H22O10	[M-H]-	6-O-Caffeoylarbutin	Phenolic acids	Phenolic acids
Lman004552	Negative	417.12	145.03	418.126	C21H22O9	[M-H]-	21046	9	20385	12941	16196	21035	16102	29966	32968	19143	9	14890	418.126	C21H22O9	[M-H]-	Robustaside A;[6'-p-Coumarylarbutin]	Phenolic acids	Phenolic acids
Lmbn001930	Negative	121.03	77.04	122.037	C7H6O2	[M-H]-	114060	83182	67300	153850	90781	109200	83722	80567	137110	115850	139700	76618	122.037	C7H6O2	[M-H]-	2-Hydroxybenzaldehyde (Salicylaldehyde)	Phenolic acids	Phenolic acids
Lmbn002648	Negative	163.04	119.05	164.047	C9H8O3	[M-H]-	2454900	1698200	2883900	2057300	463850	225390	210040	372410	507080	784240	782890	832300	164.047	C9H8O3	[M-H]-	α-Hydroxycinnamic Acid*	Phenolic acids	Phenolic acids
Lmbn004790	Negative	209.08	179.03	210.089	C11H14O4	[M-H]-	9	9	9	9	9	9	9	9	9	115530	181150	172240	210.089	C11H14O4	[M-H]-	Methyl 3-(3-hydroxy-4-methoxyphenyl)propanoate	Phenolic acids	Phenolic acids
Lmbn004847	Negative	179.07	146.04	180.079	C10H12O3	[M-H]-	9	9	9	6856	9	9	9	9	9	33197	33379	26787	180.079	C10H12O3	[M-H]-	4-Methoxyphenylpropionic acid	Phenolic acids	Phenolic acids
Lmbn005172	Negative	165.06	119.05	166.063	C9H10O3	[M-H]-	21830	23660	365830	209190	14411	25622	16842	19985	75211	10975	22177	88111	166.063	C9H10O3	[M-H]-	2,6-Dimethoxybenzaldehyde	Phenolic acids	Phenolic acids
Lmbn013410	Negative	205.16	189.13	206.167	C14H22O	[M-H]-	718330	521270	585690	677420	547700	640280	643950	668960	555530	535520	429890	453940	206.167	C14H22O	[M-H]-	2,4-Di-Tert-Butylphenol*	Phenolic acids	Phenolic acids
Lmgn001670	Negative	137.03	108.02	138.032	C7H6O3	[M-H]-	40520	41983	68985	55966	31597	91122	42459	29822	91236	152590	201360	133780	138.032	C7H6O3	[M-H]-	Salicylic acid	Phenolic acids	Phenolic acids
Lmgn002250	Negative	677.17	191.06	678.18	C31H34O17	[M-H]-	105200	38408	120570	155220	143960	70526	81392	81199	66206	149660	220800	162050	678.18	C31H34O17	[M-H]-	Dicaffeoylquinic acid-O-glucoside	Phenolic acids	Phenolic acids
Lmgn002253	Negative	695.2	353.09	696.19	C31H36O18	[M-H]-	4125500	2429300	3444700	4715800	5588600	781480	2987500	2994000	1716700	2570700	2898700	3146900	696.19	C31H36O18	[M-H]-	Syringoylcaffeoylquinic acid-D-glucose	Phenolic acids	Phenolic acids
Lmgp002593	Positive	123.04	77.04	122.037	C7H6O2	[M+H]+	9	9	9	17783	9	9	9	9	9	9	9	9	122.037	C7H6O2	[M+H]+	3-hydroxybenzaldehyde	Phenolic acids	Phenolic acids
Lmgp003989	Positive	499.13	163.04	498.116	C25H22O11	[M+H]+	170510	79971	183820	219270	541200	116860	333750	145260	174800	3667600	4413800	4559300	498.116	C25H22O11	[M+H]+	Dicaffeoylshikimic acid	Phenolic acids	Phenolic acids
Lmhn002140	Negative	325.06	193.05	326.064	C14H14O9	[M-H]-	9	9	111040	48179	9	9	9	9	9	9	9	9	326.064	C14H14O9	[M-H]-	Feruloyltartaric acid (Fertaric acid)	Phenolic acids	Phenolic acids
Lmhn002321	Negative	461.07	167.04	462.08	C21H18O12	[M-H]-	20200	21214	22476	58902	59558	57796	21942	27562	48900	21792	20273	23635	462.08	C21H18O12	[M-H]-	Vnilloylcaffeoyltartaric acid	Phenolic acids	Phenolic acids
Lmhn002574	Negative	431.06	137.03	432.069	C20H16O11	[M-H]-	9	9	18395	10748	9	9	9	9	9	4373.5	10390	9	432.069	C20H16O11	[M-H]-	Caffeoyl(p-Hydroxybenzoyl)tartaric acid	Phenolic acids	Phenolic acids
Lmhn002629	Negative	253.04	121.03	254.043	C11H10O7	[M-H]-	9	11926	20269	9600.2	9	9	9	9	7207.8	6545.2	6648	9	254.043	C11H10O7	[M-H]-	Benzoyltartaric acid	Phenolic acids	Phenolic acids
Lmhn002683	Negative	457.08	163.04	458.085	C22H18O11	[M-H]-	23773	16626	20640	27479	19253	14516	20586	37225	27248	21010	17525	19877	458.085	C22H18O11	[M-H]-	p-Coumaroylcaffeoyltartaric acid	Phenolic acids	Phenolic acids
Lmhn002926	Negative	279.05	163.04	280.058	C13H12O7	[M-H]-	2875000	1874000	2989400	3581400	4248000	11401000	5398000	3738500	6368400	4932900	5825700	4325300	280.058	C13H12O7	[M-H]-	p-Coumaroylmalic acid	Phenolic acids	Phenolic acids
Lmhn003074	Negative	309.06	193.05	310.069	C14H14O8	[M-H]-	1057000	837210	1696900	1162600	874670	2181500	1334700	998940	1018700	1223900	1166400	1013100	310.069	C14H14O8	[M-H]-	Feruloylmalic acid	Phenolic acids	Phenolic acids
Lmhn003240	Negative	237.04	121.03	238.048	C11H10O6	[M-H]-	13936	8862	47268	20258	26244	38753	28081	16820	22595	319030	680370	776690	238.048	C11H10O6	[M-H]-	Benzoylmalic acid	Phenolic acids	Phenolic acids
Lmhn104620	Negative	425.09	277.03	426.095	C22H18O9	[M-H]-	9	9	6016.5	9	9	9	9	9	9	9	9	9	426.095	C22H18O9	[M-H]-	p-Coumaroylcinnamoyltartaric acid	Phenolic acids	Phenolic acids
Lmjp003731	Positive	531.15	177.06	530.142	C26H26O12	[M+H]+	5187	9	9	17624	9	5182	9734.5	9	8315.2	1480800	1486700	1426300	530.142	C26H26O12	[M+H]+	3,4-O-Dicaffeoylquinic Acid Methyl Ester*	Phenolic acids	Phenolic acids
Lmjp003822	Positive	531.15	177.06	530.142	C26H26O12	[M+H]+	9	9	7995.4	16449	9	4945.7	9	9	9	1267800	1557400	1554400	530.142	C26H26O12	[M+H]+	3,5-O-Dicaffeoylquinic Acid Methyl Ester*	Phenolic acids	Phenolic acids
Lmln010063	Negative	205.16	189.13	206.167	C14H22O	[M-H]-	725620	504550	593550	746000	623320	591760	620890	670570	544610	461780	487620	505520	206.167	C14H22O	[M-H]-	2,6-Di-tert-butylphenol*	Phenolic acids	Phenolic acids
Lmlp002765	Positive	229.12	201.13	228.115	C15H16O2	[M+H]+	9	9	9	9	9	9	9	9	9	29005	93007	123480	228.115	C15H16O2	[M+H]+	Stilbostemin B	Phenolic acids	Phenolic acids
Lmlp012720	Positive	279.16	149.02	278.152	C16H22O4	[M+H]+	1324100	1401500	1560800	1454000	1207600	1474900	1549200	1247600	1414600	1849100	1314200	1528100	278.152	C16H22O4	[M+H]+	Dibutyl phthalate*	Phenolic acids	Phenolic acids
Lmmn000774	Negative	343.1	181.05	344.111	C15H20O9	[M-H]-	972110	764390	892650	1503700	1813400	2188800	934460	919080	919170	1089300	1027200	1086300	344.111	C15H20O9	[M-H]-	Dihydrocaffeoylglucose	Phenolic acids	Phenolic acids
Lmmn001294	Negative	331.1	153.02	332.111	C14H20O9	[M-H]-	617630	577650	658010	650980	790900	715590	491050	728580	623450	1316400	1539400	1704000	332.111	C14H20O9	[M-H]-	Koaburaside	Phenolic acids	Phenolic acids
Lmmn001643	Negative	163.04	119.05	164.047	C9H8O3	[M-H]-	2337700	1587100	2809900	2066000	462480	160610	200870	311380	494850	723640	798060	871160	164.047	C9H8O3	[M-H]-	2-Hydroxycinnamic acid*	Phenolic acids	Phenolic acids
Lmmn002179	Negative	313.09	107.05	314.1	C14H18O8	[M-H]-	206620	207190	217720	355710	268590	326590	196890	282870	250520	338090	293360	367860	314.1	C14H18O8	[M-H]-	Methyl salicylate-2-O-glucoside	Phenolic acids	Phenolic acids
Lmmn003663	Negative	329.09	167.04	330.095	C14H18O9	[M-H]-	208640	167740	255410	189720	197520	108860	265330	459560	191870	217190	524920	420220	330.095	C14H18O9	[M-H]-	5-Glucosyloxy-2-Hydroxybenzoic acid methyl ester	Phenolic acids	Phenolic acids
Lmmp010562	Positive	391.28	149.02	390.277	C24H38O4	[M+H]+	878550	514940	814390	3084100	1336400	990430	1031100	1167500	1344300	3297400	977490	557760	390.277	C24H38O4	[M+H]+	Diisooctyl Phthalate*	Phenolic acids	Phenolic acids
Lmqn005404	Negative	451.09	331.07	452.095	C20H20O12	[M-H]-	9	9	9	9	9	9	9	9	9	74560	141890	148860	452.095	C20H20O12	[M-H]-	4-Hydroxybenzoyl-1-O-(6''-O-galloyl)glucoside	Phenolic acids	Phenolic acids
Lmqp008175	Positive	163.08	103.05	162.068	C10H10O2	[M+H]+	9	9	5341.4	7032.1	9	9	9	3969.2	9	420850	1284400	1005800	162.068	C10H10O2	[M+H]+	Methyl Cinnamate	Phenolic acids	Phenolic acids
Lmrn001951	Negative	181.05	135.04	182.058	C9H10O4	[M-H]-	9	9	35203	27212	9	9	9	9	9	9	9	9	182.058	C9H10O4	[M-H]-	(S)-2-Hydroxy-3-(4-Hydroxyphenyl)Propanoic Acid	Phenolic acids	Phenolic acids
Lmrn003000	Negative	165.06	103.06	166.063	C9H10O3	[M-H]-	124390	69025	1456800	1260300	190930	469530	144380	169720	412650	124250	169040	301460	166.063	C9H10O3	[M-H]-	2-Hydroxy-3-phenylpropanoic acid	Phenolic acids	Phenolic acids
Lmsn002887	Negative	311.08	163.04	312.085	C14H16O8	[M-H]-	76080	51407	51715	93601	83045	115620	43826	49363	60594	63937	41503	72398	312.085	C14H16O8	[M-H]-	1-O-Caffeoyl xylose	Phenolic acids	Phenolic acids
Lmsn003318	Negative	355.1	175.04	356.111	C16H20O9	[M-H]-	252230	215290	1236200	1800700	1765600	754290	832160	1446000	1030200	16157000	30411000	25239000	356.111	C16H20O9	[M-H]-	1-O-Feruloyl-β-D-glucose*	Phenolic acids	Phenolic acids
Lmsn004322	Negative	503.12	179.03	504.127	C24H24O12	[M-H]-	9	9	30852	40812	9	9	9	9	9	91804	90510	94228	504.127	C24H24O12	[M-H]-	1,6-Di-O-caffeoyl-β-D-glucose*	Phenolic acids	Phenolic acids
Lmsn004674	Negative	309.1	147.05	310.105	C15H18O7	[M-H]-	9	9	9	9	9	9	9	9	9	221980	761560	368210	310.105	C15H18O7	[M-H]-	1-O-Cinnamoyl-β-D-glucose	Phenolic acids	Phenolic acids
Lmsn004970	Negative	503.12	179.04	504.127	C24H24O12	[M-H]-	9	9	49709	9	9	9	9	9	9	84043	54762	73709	504.127	C24H24O12	[M-H]-	3,6-Di-O-caffeoyl glucose*	Phenolic acids	Phenolic acids
Lmsp004450	Positive	359.15	131.05	358.142	C20H22O6	[M+H]+	9	9	86101	63025	9	12889	11995	10439	16877	8947.2	25931	37670	358.142	C20H22O6	[M+H]+	Dehydrodiconiferyl alcohol	Phenolic acids	Phenolic acids
Lmtn002233	Negative	327.11	165.05	328.116	C15H20O8	[M-H]-	1111400	1007300	1128100	1948200	2331400	1685300	947380	1210600	1636200	3377300	3668400	4244200	328.116	C15H20O8	[M-H]-	Androsin	Phenolic acids	Phenolic acids
Lmtn002565	Negative	329.11	167.03	330.095	C14H18O9	[M-H]-	6582	16510	21217	51572	18075	27776	17186	28702	35446	809060	952590	937270	330.095	C14H18O9	[M-H]-	1-O-Vanilloyl-D-Glucose	Phenolic acids	Phenolic acids
Lmtn003441	Negative	311.11	149.06	312.121	C15H20O7	[M-H]-	170230	75724	90306	157190	250790	175720	107620	161840	210040	690560	864340	793600	312.121	C15H20O7	[M-H]-	2-Acetyl-3-hydroxyphenyl-1-O-glucoside	Phenolic acids	Phenolic acids
Lmwp011196	Positive	391.28	149.02	390.277	C24H38O4	[M+H]+	894880	505470	777950	3128700	1324100	976310	1002800	1163300	1342700	3347900	966270	598380	390.277	C24H38O4	[M+H]+	Bis(2-ethylhexyl)phthalate*	Phenolic acids	Phenolic acids
Lmxp011770	Positive	279.16	149.02	278.152	C16H22O4	[M+H]+	1335500	1240400	1545300	1483900	1243500	1472700	1608400	1294100	1380000	1747200	1239300	1769100	278.152	C16H22O4	[M+H]+	Diisobutyl phthalate*	Phenolic acids	Phenolic acids
Lmyn000160	Negative	237.06	87.01	238.069	C8H14O8	[M-H]-	1213100	1151500	1032900	1495800	1312700	1971000	1723500	1433000	2017600	2070300	2702500	2167000	238.069	C8H14O8	[M-H]-	Mucic acid Dimethyl Ester	Phenolic acids	Phenolic acids
Lmyn002403	Negative	313.09	101.02	314.1	C14H18O8	[M-H]-	87763	73092	85763	123790	93386	121750	85101	107290	109650	113770	122980	148290	314.1	C14H18O8	[M-H]-	Mandelic acid-β-glucoside	Phenolic acids	Phenolic acids
Lmyn003835	Negative	289.04	137.02	290.043	C14H10O7	[M-H]-	20608	18574	47781	83707	22848	9	15560	44020	7476	6129700	8117700	5146400	290.043	C14H10O7	[M-H]-	4-(3,4,5-Trihydroxybenzoxy)benzoic acid	Phenolic acids	Phenolic acids
Lmyn006304	Negative	527.16	121.03	528.163	C27H28O11	[M-H]-	9	9	402190	299200	9	9	9	9	103690	9	9	51119	528.163	C27H28O11	[M-H]-	Tremulacin	Phenolic acids	Phenolic acids
Lmzn001925	Negative	239.09	195.1	240.1	C12H16O5	[M-H]-	24543	18389	29122	43124	34708	33420	25062	28564	20918	11808	26245	20678	240.1	C12H16O5	[M-H]-	3,4'-Dihydroxy-3'-methoxybenzenepentanoic acid	Phenolic acids	Phenolic acids
Lmzn001983	Negative	375.13	135.05	376.137	C16H24O10	[M-H]-	35916	20769	35947	58308	48371	65062	39405	34378	43035	163590	197450	223000	376.137	C16H24O10	[M-H]-	D-Threo-guaiacylglycerol-7-O-β-D-glucoside	Phenolic acids	Phenolic acids
ML10179289	Positive	105.07	77.04	122.073	C8H10O	[M-H2O+H]+	9	9	241460	132870	9	9	9	9	9	9	9	9	122.073	C8H10O	[M-H2O+H]+	2-Phenylethanol	Phenolic acids	Phenolic acids
mws0014	Negative	193.05	134.01	194.058	C10H10O4	[M-H]-	43201	52451	313480	274620	150810	109870	53992	138670	76530	499600	1006700	801610	194.058	C10H10O4	[M-H]-	Ferulic acid*	Phenolic acids	Phenolic acids
mws0027	Negative	197.05	123	198.053	C9H10O5	[M-H]-	13852	23193	22441	17388	13814	11918	9231.8	9542	13561	15689	22901	21325	198.053	C9H10O5	[M-H]-	Syringic acid	Phenolic acids	Phenolic acids
mws0028	Negative	167.03	108.02	168.042	C8H8O4	[M-H]-	9	9	47204	14518	16434	16772	18072	9	9	49661	47298	37200	168.042	C8H8O4	[M-H]-	Vanillic acid	Phenolic acids	Phenolic acids
mws0093	Negative	179.07	146	180.079	C10H12O3	[M-H]-	9	9	15369	13608	9	9	9	9	9	76652	113960	124350	180.079	C10H12O3	[M-H]-	Coniferyl alcohol	Phenolic acids	Phenolic acids
mws0178	Negative	353.09	191.01	354.095	C16H18O9	[M-H]-	1204700	354530	883540	929600	1555800	226870	728440	611620	421770	1238900	2331700	2109000	354.095	C16H18O9	[M-H]-	Chlorogenic acid (3-O-Caffeoylquinic acid)	Phenolic acids	Phenolic acids
mws0179	Negative	367.1	190.9	368.111	C17H20O9	[M-H]-	233480	171080	163540	127610	114780	75510	128890	179420	75416	349720	418160	242680	368.111	C17H20O9	[M-H]-	Chlorogenic acid methyl ester	Phenolic acids	Phenolic acids
mws0180	Negative	153.02	109.03	154.027	C7H6O4	[M-H]-	9	36202	223100	114410	47146	42787	9	9	54248	88662	113870	136280	154.027	C7H6O4	[M-H]-	2,5-Dihydroxybenzoic acid; Gentisic Acid*	Phenolic acids	Phenolic acids
mws0183	Negative	153.02	109.03	154.027	C7H6O4	[M-H]-	114360	9	590020	344230	64823	112590	59448	74239	59050	160470	245490	230310	154.027	C7H6O4	[M-H]-	3,4-Dihydroxybenzoic acid (Protocatechuic acid)*	Phenolic acids	Phenolic acids
mws0458	Negative	151.04	136	152.047	C8H8O3	[M-H]-	547120	439180	436690	625700	730870	923960	509130	500600	576120	1580300	1776500	1730100	152.047	C8H8O3	[M-H]-	Vanillin; 4-Hydroxy-3-Methoxybenzaldehyde	Phenolic acids	Phenolic acids
mws0467	Negative	165.06	119.05	166.063	C9H10O3	[M-H]-	26461	9	413610	273540	15587	50444	20022	25585	85095	21790	30888	68282	166.063	C9H10O3	[M-H]-	3-(4-Hydroxyphenyl)-propionic acid	Phenolic acids	Phenolic acids
mws0628	Negative	121.03	92	122.037	C7H6O2	[M-H]-	65252	76958	186870	89696	78719	92507	100880	49722	75676	171230	202290	160920	122.037	C7H6O2	[M-H]-	4-Hydroxybenzaldehyde	Phenolic acids	Phenolic acids
mws0639	Negative	153.02	109.03	154.027	C7H6O4	[M-H]-	88590	97729	139020	93643	58038	74858	59864	59723	115580	178440	324590	212500	154.027	C7H6O4	[M-H]-	2,3-Dihydroxybenzoic Acid*	Phenolic acids	Phenolic acids
mws0749	Negative	137.02	93	138.032	C7H6O3	[M-H]-	215950	172360	274310	142950	29836	143400	91410	101420	73201	119310	138900	145100	138.032	C7H6O3	[M-H]-	4-Hydroxybenzoic acid	Phenolic acids	Phenolic acids
mws0853	Negative	209.08	179	210.089	C11H14O4	[M-H]-	9	9	6020.5	9	9	9	9	9	190.12	121670	171480	219610	210.089	C11H14O4	[M-H]-	Sinapyl alcohol	Phenolic acids	Phenolic acids
mws0885	Negative	153.02	109.03	154.027	C7H6O4	[M-H]-	9	9	199270	135990	9	9	9	9	9	9	9	9	154.027	C7H6O4	[M-H]-	2,4-Dihydroxybenzoic acid*	Phenolic acids	Phenolic acids
mws0906	Negative	341.12	179	342.131	C16H22O8	[M-H]-	662820	451190	1337500	2173800	545160	150590	9	495620	395950	3925400	5336300	5252300	342.131	C16H22O8	[M-H]-	Coniferin	Phenolic acids	Phenolic acids
mws0921	Negative	149.06	131	150.068	C9H10O2	[M-H]-	9	9	16571	16398	9	9	9	9	9	9	9	9	150.068	C9H10O2	[M-H]-	p-Coumaryl alcohol	Phenolic acids	Phenolic acids
mws1195	Positive	179.07	147.1	178.063	C10H10O3	[M+H]+	12825	6915.7	45513	35863	5704.3	2740.6	5824.6	6012.6	11703	18615	24538	22965	178.063	C10H10O3	[M+H]+	p-Coumaric acid methyl ester	Phenolic acids	Phenolic acids
mws1336	Positive	138.06	120	137.048	C7H7NO2	[M+H]+	5118.5	4839.4	15532	6971.3	6256.1	9	4499.2	9	6508.2	5160.2	11043	5138.8	137.048	C7H7NO2	[M+H]+	4-Aminobenzoic acid	Phenolic acids	Phenolic acids
mws1350	Negative	181.05	151	182.058	C9H10O4	[M-H]-	25033	7945.2	32555	50804	32526	66734	39794	11376	40194	108150	111690	116230	182.058	C9H10O4	[M-H]-	Syringaldehyde; 4-Hydroxy-3,5-Dimethoxybenzaldehyde	Phenolic acids	Phenolic acids
mws1358	Negative	109.03	81	110.037	C6H6O2	[M-H]-	9	9	526610	709940	9	9	9	9	59827	9	9	71637	110.037	C6H6O2	[M-H]-	Pyrocatechol	Phenolic acids	Phenolic acids
mws1521	Negative	285.1	121.03	286.105	C13H18O7	[M-H]-	9	9	682360	765660	9	9	9	5934	121720	9	9	112010	286.105	C13H18O7	[M-H]-	Salicin	Phenolic acids	Phenolic acids
mws1584	Negative	515.12	191.05	516.127	C25H24O12	[M-H]-	9	9	355470	119760	9	9	9	9	9	9	9	9	516.127	C25H24O12	[M-H]-	1,3-O-Dicaffeoylquinic Acid (Cynarin)*	Phenolic acids	Phenolic acids
MWS1848	Negative	135.05	92.03	136.052	C8H8O2	[M-H]-	14449	18499	26987	8799	13553	13602	14297	3619	11954	18263	20608	20679	136.052	C8H8O2	[M-H]-	Phenyl acetate	Phenolic acids	Phenolic acids
MWS1852	Positive	137.06	94.04	136.052	C8H8O2	[M+H]+	9	9	7927.5	6696.2	9	3272.1	9	9	9	11021	22912	20194	136.052	C8H8O2	[M+H]+	4-Methoxybenzaldehyde	Phenolic acids	Phenolic acids
MWS1877	Negative	205.16	133.06	206.167	C14H22O	[M-H]-	13503	16060	16442	15930	13097	14189	16717	14016	14202	14415	6721.7	14760	206.167	C14H22O	[M-H]-	4-tert-Octylphenol	Phenolic acids	Phenolic acids
MWS20163	Negative	325.13	148.05	326.137	C16H22O7	[M-H]-	9	9	13944	3848	9	9	9	9	9	9	9	9	326.137	C16H22O7	[M-H]-	Citrusin C	Phenolic acids	Phenolic acids
MWS20182	Negative	195.07	136.05	196.074	C10H12O4	[M-H]-	11251	8821.5	5539.2	19115	18514	9	11923	4806.5	25282	27729	26892	13320	196.074	C10H12O4	[M-H]-	Dihydroferulic Acid	Phenolic acids	Phenolic acids
MWS2099	Positive	137.06	77.04	136.052	C8H8O2	[M+H]+	23254	23649	24219	13993	17506	15202	13268	18574	23792	10020	9186.3	12091	136.052	C8H8O2	[M+H]+	4-Methylbenzoic acid	Phenolic acids	Phenolic acids
mws2108	Negative	353.09	191.05	354.095	C16H18O9	[M-H]-	1101600	422220	839170	1052700	1586100	262240	758340	664610	443750	1494000	2437000	1859100	354.095	C16H18O9	[M-H]-	Cryptochlorogenic acid (4-O-Caffeoylquinic acid)	Phenolic acids	Phenolic acids
mws2212	Negative	179.03	135.05	180.042	C9H8O4	[M-H]-	95944	58067	3196900	956780	62058	16166	4328.1	25522	133440	198330	291750	336890	180.042	C9H8O4	[M-H]-	Caffeic acid	Phenolic acids	Phenolic acids
mws2213	Negative	147.05	77.01	148.052	C9H8O2	[M-H]-	9	9	8101.9	4485.1	9	9	9	9	9	55248	80629	59590	148.052	C9H8O2	[M-H]-	Cinnamic acid	Phenolic acids	Phenolic acids
mws2367	Negative	299.11	119	300.121	C14H20O7	[M-H]-	97996	62926	58444	76535	25090	71792	37530	41358	51313	98028	155180	117950	300.121	C14H20O7	[M-H]-	Salidroside	Phenolic acids	Phenolic acids
mws2368	Negative	137.06	119.05	138.068	C8H10O2	[M-H]-	10682	11961	3987	18349	13692	13956	13362	9	9365.5	18854	23216	11002	138.068	C8H10O2	[M-H]-	Tyrosol; 4-Hydroxyphenylethanol	Phenolic acids	Phenolic acids
MWS3046	Negative	181.05	121.03	182.058	C9H10O4	[M-H]-	9	9	142130	151280	9	9	9	8167	18406	14822	9	27521	182.058	C9H10O4	[M-H]-	3-(3-Hydroxyphenyl)-3-hydroxypropanoic acid	Phenolic acids	Phenolic acids
MWS3149	Negative	151.04	107.05	152.047	C8H8O3	[M-H]-	27953	25811	41322	33454	22456	38789	22957	39970	44684	28777	41777	27068	152.047	C8H8O3	[M-H]-	3-Methoxybenzoic acid	Phenolic acids	Phenolic acids
mws4085	Negative	223.06	193	224.068	C11H12O5	[M-H]-	9	9	101200	23692	9	9	9	9	9	23230	20124	17822	224.068	C11H12O5	[M-H]-	Sinapic acid	Phenolic acids	Phenolic acids
MWS5206	Negative	181.05	135.04	182.058	C9H10O4	[M-H]-	9	5220.2	29936	17658	9	9	9	6842.9	4823.6	9	9	9	182.058	C9H10O4	[M-H]-	Hydroxyphenyllactic acid	Phenolic acids	Phenolic acids
MWSCX015	Positive	165.05	91.05	164.047	C9H8O3	[M+H]+	97180	70597	97736	63911	20829	20657	15684	18986	17656	25218	43687	35582	164.047	C9H8O3	[M+H]+	Caffeic aldehyde	Phenolic acids	Phenolic acids
MWSmce040	Positive	153.05	65.04	152.047	C8H8O3	[M+H]+	23758	20337	18752	37143	37192	46942	48509	19844	33897	131030	127400	122860	152.047	C8H8O3	[M+H]+	Isovanillin	Phenolic acids	Phenolic acids
MWSmce083	Negative	207.07	133.03	208.074	C11H12O4	[M-H]-	8231	8417.3	30853	24398	41094	19218	23233	29520	12966	369510	633810	392730	208.074	C11H12O4	[M-H]-	Ferulic acid methyl ester	Phenolic acids	Phenolic acids
MWSmce230	Negative	183.03	124.02	184.037	C8H8O5	[M-H]-	22901	36848	16559	92146	54549	14271	101740	219210	10522	5296.2	6575.8	51650	184.037	C8H8O5	[M-H]-	Methyl gallate*	Phenolic acids	Phenolic acids
MWSmce247	Negative	135.05	91.06	136.052	C8H8O2	[M-H]-	10352	8402.1	10511	11635	7844.1	11294	9618.1	10306	10178	8791.6	4081.2	6589.4	136.052	C8H8O2	[M-H]-	2-Methylbenzoic acid	Phenolic acids	Phenolic acids
MWSmce283	Negative	149.07	92.03	150.068	C9H10O2	[M-H]-	4560.8	3373.1	6032.8	2650.3	5715.2	12477	4411.5	4805.6	4810.4	37150	31739	31642	150.068	C9H10O2	[M-H]-	4'-Hydroxypropiophenone	Phenolic acids	Phenolic acids
MWSmce341	Positive	279.16	149.03	278.152	C16H22O4	[M+H]+	1262200	1352000	1547200	1552800	1316400	1600000	1593800	1274600	1448500	1767100	1294800	1621800	278.152	C16H22O4	[M+H]+	Butyl isobutyl phthalate*	Phenolic acids	Phenolic acids
MWSmce455	Negative	181.05	107.01	182.058	C9H10O4	[M-H]-	9	9	7062	5496.6	9	9	9	9	9	9733.1	5502.2	9611.4	182.058	C9H10O4	[M-H]-	Vanillic acid methyl ester	Phenolic acids	Phenolic acids
MWSmce466	Negative	135.05	92.03	136.052	C8H8O2	[M-H]-	8055.2	11103	27362	23998	11162	14473	12336	10774	10834	31882	27535	18268	136.052	C8H8O2	[M-H]-	4-Hydroxyacetophenone	Phenolic acids	Phenolic acids
MWSmce501	Negative	167.04	108.02	168.042	C8H8O4	[M-H]-	18813	12678	35668	46567	14988	40649	19477	18109	31870	125590	131290	139860	168.042	C8H8O4	[M-H]-	Protocatechuic Acid Methyl Ester	Phenolic acids	Phenolic acids
MWSmce537	Positive	167.07	124.05	166.063	C9H10O3	[M+H]+	9	9	26309	22214	9	9	9	9	4978.1	9	9	9	166.063	C9H10O3	[M+H]+	Veratraldehyde	Phenolic acids	Phenolic acids
MWSmce580	Negative	137.02	108.02	138.032	C7H6O3	[M-H]-	9	9	32472	26106	9	9	9	9	9	9	9	9	138.032	C7H6O3	[M-H]-	2,5-Dihydroxybenzaldehyde	Phenolic acids	Phenolic acids
MWSmce632	Positive	195.06	93.03	194.058	C10H10O4	[M+H]+	9	9	9	9	9	9	9	9	9	12212	18477	14631	194.058	C10H10O4	[M+H]+	Vanillin acetate	Phenolic acids	Phenolic acids
MWSmce675	Negative	271.08	108.02	272.09	C12H16O7	[M-H]-	3327900	2295200	2898400	4239200	5409500	10805000	5055200	2991200	5736000	3362800	3265500	2540700	272.09	C12H16O7	[M-H]-	Arbutin	Phenolic acids	Phenolic acids
MWSslk035	Negative	285.1	123.05	286.105	C13H18O7	[M-H]-	9	9	578790	505080	9	9	9	9	74756	79101	139910	81542	286.105	C13H18O7	[M-H]-	Orcinol glucoside	Phenolic acids	Phenolic acids
MWSslk097	Positive	195.06	163.04	194.058	C10H10O4	[M+H]+	30174	41359	27900	31434	34430	38714	27043	35784	32833	29769	27289	30126	194.058	C10H10O4	[M+H]+	Dimethyl phthalate	Phenolic acids	Phenolic acids
NK10253223	Positive	168.06	94.06	167.058	C8H9NO3	[M+H]+	17893	15766	24742	32493	25701	36996	22245	17459	41136	40787	48119	36599	167.058	C8H9NO3	[M+H]+	2-Amino-3-methoxybenzoic acid	Phenolic acids	Phenolic acids
pma0149	Positive	341.08	207.07	340.079	C15H16O9	[M+H]+	11606	10309	11558	23747	20043	37726	15527	10676	16332	23672	21500	29688	340.079	C15H16O9	[M+H]+	Sinapoyl malate	Phenolic acids	Phenolic acids
pma3724	Positive	369.1	177.1	368.111	C17H20O9	[M+H]+	21826	18973	1119100	755480	141480	41561	35298	82346	138040	7018100	13516000	9505600	368.111	C17H20O9	[M+H]+	1-O-Feruloylquinic acid	Phenolic acids	Phenolic acids
pma6460	Negative	337.09	163.04	338.1	C16H18O8	[M-H]-	9	9	108740	90043	32733	12557	9	9	13359	101360	381600	180020	338.1	C16H18O8	[M-H]-	4-O-p-Coumaroylquinic acid*	Phenolic acids	Phenolic acids
pmb0069	Positive	122	105	121.053	C7H7NO	[M+H]+	9	9	288720	206400	9	9	9	9	43357	9	9	16563	121.053	C7H7NO	[M+H]+	Benzamide	Phenolic acids	Phenolic acids
pmb0108	Positive	375.2	137.1	374.1	C19H18O8	[M+H]+	12278	14811	133200	124240	20174	24690	14848	15622	44492	25372	55972	58167	374.1	C19H18O8	[M+H]+	Feruloyl syringic acid	Phenolic acids	Phenolic acids
pmb0751	Positive	321.1	147.3	320.09	C16H16O7	[M+H]+	11571	1738	792010	481050	83284	6136.2	6116.8	3533.5	113530	176910	232370	211910	320.09	C16H16O7	[M+H]+	Trans-5-O-(p-Coumaroyl)shikimate	Phenolic acids	Phenolic acids
pmb0752	Positive	369.12	177.1	368.111	C17H20O9	[M+H]+	7463	9	1936100	1331300	7447	9203	8634.5	5556.2	233600	33570	34546	145360	368.111	C17H20O9	[M+H]+	3-O-Feruloylquinic acid	Phenolic acids	Phenolic acids
pmb2620	Negative	207.07	133.1	208.074	C11H12O4	[M-H]-	4207.3	6604.5	20904	19175	30126	16077	12713	15680	7919.4	233470	380120	237200	208.074	C11H12O4	[M-H]-	3,4-Dimethoxycinnamic acid	Phenolic acids	Phenolic acids
pmb2654	Negative	460.1	117.9	461.153	C19H27NO12	[M-H]-	1116400	1491800	1624900	2371700	1610500	1114300	2810300	1311400	1471700	630580	772080	499840	461.153	C19H27NO12	[M-H]-	Anthranilate-1-O-Sophoroside	Phenolic acids	Phenolic acids
pmb2795	Negative	177	145	178.063	C10H10O3	[M-H]-	46176	32659	170650	130800	16216	7355.8	9217.1	25659	21722	49623	61144	51173	178.063	C10H10O3	[M-H]-	4-Methoxycinnamic acid	Phenolic acids	Phenolic acids
pmb2819	Negative	665.1	218.1	666.201	C27H38O19	[M-H]-	18886	9340	22558	8386.3	5995.2	5516.6	1672.7	8243.6	6464.5	10390	9566.6	10172	666.201	C27H38O19	[M-H]-	O-Caffeoyl maltotriose	Phenolic acids	Phenolic acids
pmb2871	Negative	315.07	153	316.079	C13H16O9	[M-H]-	301200	271360	9548300	5922700	867930	812170	500840	359330	909870	7121400	7608200	10787000	316.079	C13H16O9	[M-H]-	1-O-Gentisoyl-β-D-glucoside	Phenolic acids	Phenolic acids
pmb3061	Negative	499.15	163.1	500.153	C22H28O13	[M-H]-	9	9	12605	17334	9	9	9	9	9	9	9	11834	500.153	C22H28O13	[M-H]-	5-O-p-Coumaroylquinic acid O-glucoside	Phenolic acids	Phenolic acids
pmb3062	Negative	385.1	151.1	386.102	C17H22O10	[M-H]-	22726	15965	18402	19129	23317	34847	23834	21188	30549	23481	25413	13172	386.102	C17H22O10	[M-H]-	1-O-Eudesmoylquinic acid	Phenolic acids	Phenolic acids
pmb3066	Negative	481.14	319.2	482.142	C22H26O12	[M-H]-	19250	9368.1	23867	32053	63312	65960	20690	31999	38222	17896	33407	27432	482.142	C22H26O12	[M-H]-	5-O-p-Coumaroylshikimic acid O-glucoside	Phenolic acids	Phenolic acids
pmb3074	Negative	337.09	191.05	338.1	C16H18O8	[M-H]-	9	9	482310	294300	87113	21852	6229	9	59822	338860	1087100	576280	338.1	C16H18O8	[M-H]-	5-O-p-Coumaroylquinic acid*	Phenolic acids	Phenolic acids
pmb3075	Negative	319	145.1	320.09	C16H16O7	[M-H]-	9	9	467660	247600	37011	5163	9	4466	67942	84474	161280	103450	320.09	C16H16O7	[M-H]-	3-O-p-Coumaroylshikimic acid	Phenolic acids	Phenolic acids
pmb3107	Negative	359.1	182.1	360.106	C15H20O10	[M-H]-	1110700	759590	734680	1173800	976010	1630800	1055000	1073900	1345500	4178900	6073800	6268600	360.106	C15H20O10	[M-H]-	Glucosyringic Acid	Phenolic acids	Phenolic acids
pmb3142	Negative	299.1	137.1	300.085	C13H16O8	[M-H]-	1415600	984390	587300	769190	551380	844470	480390	679590	718380	1258000	1903500	1550600	300.085	C13H16O8	[M-H]-	Salicylic acid-2-O-glucoside	Phenolic acids	Phenolic acids
pme0085	Negative	359.08	196.7	360.084	C18H16O8	[M-H]-	309230	229200	237460	368760	385550	480140	211450	217280	335980	207160	259480	167370	360.084	C18H16O8	[M-H]-	Rosmarinic acid	Phenolic acids	Phenolic acids
pme0241	Positive	123.04	79	122.037	C7H6O2	[M+H]+	9	9	9	9	9	9	9	9	9	46521	54417	46379	122.037	C7H6O2	[M+H]+	Benzoic acid	Phenolic acids	Phenolic acids
pme0282	Negative	165.02	77.04	166.027	C8H6O4	[M-H]-	701260	507620	489910	899440	695130	736390	599940	677910	659260	614980	757290	740950	166.027	C8H6O4	[M-H]-	Phthalic acid	Phenolic acids	Phenolic acids
pme0309	Negative	183.03	124	184.037	C8H8O5	[M-H]-	14470	12179	9	52772	22380	9	40046	44775	9	3294.5	9	28290	184.037	C8H8O5	[M-H]-	3-O-Methylgallic Acid*	Phenolic acids	Phenolic acids
pme0422	Negative	193.06	134	194.058	C10H10O4	[M-H]-	41689	27738	283260	280760	104740	79532	62613	121220	88624	551650	900310	674540	194.058	C10H10O4	[M-H]-	Isoferulic Acid*	Phenolic acids	Phenolic acids
pme1292	Negative	167.1	123.04	168.042	C8H8O4	[M-H]-	74737	75789	3640300	2387300	95503	86310	9	69662	487970	517650	606540	1223800	168.042	C8H8O4	[M-H]-	Homogentisic acid	Phenolic acids	Phenolic acids
pme1439	Positive	165.05	119	164.047	C9H8O3	[M+H]+	59610	35131	61814	56833	15682	5014.5	7455.8	13363	18637	18398	17596	28036	164.047	C9H8O3	[M+H]+	p-Coumaric acid	Phenolic acids	Phenolic acids
pme1816	Negative	353.09	191	354.095	C16H18O9	[M-H]-	82332	49870	4784800	3726900	164740	66098	97038	44539	777870	880380	976530	1670500	354.095	C16H18O9	[M-H]-	Neochlorogenic acid (5-O-Caffeoylquinic acid)	Phenolic acids	Phenolic acids
pme2828	Positive	140	99	139.027	C6H5NO3	[M+H]+	730870	559530	543590	387180	410680	715140	388030	418250	411390	394720	483390	528650	139.027	C6H5NO3	[M+H]+	4-Nitrophenol	Phenolic acids	Phenolic acids
pme3083	Negative	164.04	120	165.043	C8H7NO3	[M-H]-	351680	221770	363920	267650	75487	17492	18741	54506	86309	134920	126670	144750	165.043	C8H7NO3	[M-H]-	2-(Formylamino)benzoic acid	Phenolic acids	Phenolic acids
pme3443	Negative	207.07	192	208.074	C11H12O4	[M-H]-	19108	19636	66255	49372	21260	58020	20306	36082	27442	283260	288540	270060	208.074	C11H12O4	[M-H]-	Sinapinaldehyde	Phenolic acids	Phenolic acids
pmn001319	Negative	413.12	398.1	414.131	C22H22O8	[M-H]-	9	9	9	9	9	9	9	9	9	3703.6	9	2289.9	414.131	C22H22O8	[M-H]-	1-O-Feruloyl-3-O-p-Coumaroylglycerol	Phenolic acids	Phenolic acids
pmn001367	Negative	315.07	153.02	316.079	C13H16O9	[M-H]-	9	9	7463100	5746800	9	9	9	9	859130	6022200	5510600	10467000	316.079	C13H16O9	[M-H]-	Protocatechuic acid-4-O-glucoside	Phenolic acids	Phenolic acids
pmn001382	Negative	515.12	353.09	516.127	C25H24O12	[M-H]-	2680500	1326800	2392100	3688500	7338200	1858000	4235400	2749100	2123500	46579000	46630000	46917000	516.127	C25H24O12	[M-H]-	Isochlorogenic acid A*	Phenolic acids	Phenolic acids
pmn001384	Negative	515.12	353.09	516.127	C25H24O12	[M-H]-	2862400	1290500	2452100	4263400	7142600	2119900	4148400	2345000	2143900	45780000	45548000	42661000	516.127	C25H24O12	[M-H]-	Isochlorogenic acid C*	Phenolic acids	Phenolic acids
pmn001419	Negative	325.09	163.04	326.1	C15H18O8	[M-H]-	2762300	2221700	1694400	2257500	1884900	4187200	2012300	2388500	2032800	1502700	1070400	1341500	326.1	C15H18O8	[M-H]-	1-O-p-Coumaroyl-β-D-glucose*	Phenolic acids	Phenolic acids
pmn001420	Negative	341.09	179.04	342.095	C15H18O9	[M-H]-	3114900	3812600	3635200	3595900	2706100	5162600	1468700	2339200	3524400	4464800	3410600	4753400	342.095	C15H18O9	[M-H]-	1-O-Caffeoyl-β-D-glucose*	Phenolic acids	Phenolic acids
pmn001421	Negative	337.09	191.05	338.1	C16H18O8	[M-H]-	3753.8	9	406920	267820	64405	26138	9	7529	53649	428530	947800	356890	338.1	C16H18O8	[M-H]-	3-O-p-Coumaroylquinic acid*	Phenolic acids	Phenolic acids
pmn001511	Negative	285.1	123	286.105	C13H18O7	[M-H]-	9	5281.5	2111600	2412500	9	9	7518.2	7578.8	287200	16759	9	329240	286.105	C13H18O7	[M-H]-	3-Hydroxy-5-Methylphenol-1-O-Glucoside	Phenolic acids	Phenolic acids
pmn001518	Negative	331.07	169.01	332.074	C13H16O10	[M-H]-	119160	94685	2367400	1687700	178420	172170	118110	126320	361570	666420	783510	1165800	332.074	C13H16O10	[M-H]-	1-O-Galloyl-β-D-glucose	Phenolic acids	Phenolic acids
pmn001533	Negative	645.13	169	646.138	C26H30O19	[M-H]-	9	9	4217.9	9	9	9	9	6916.8	9	9	9	5106.9	646.138	C26H30O19	[M-H]-	2-O-Di-gallic acyl-Glucoside-Glucoside	Phenolic acids	Phenolic acids
pmn001571	Negative	313.11	298.08	314.115	C18H18O5	[M-H]-	8479.3	6998.3	3526.2	5615.4	9	4961.6	9	9	61826	9	2263.1	4663.5	314.115	C18H18O5	[M-H]-	Agrimonolide	Phenolic acids	Phenolic acids
pmn001672	Negative	547.17	223.1	548.174	C23H32O15	[M-H]-	15554	14097	23265	38193	38394	32662	15135	21199	25693	199600	161830	217290	548.174	C23H32O15	[M-H]-	Furanofructosyl-α-D-(3-mustard acyl)glucoside	Phenolic acids	Phenolic acids
pmn001681	Negative	165.09	149.06	166.099	C10H14O2	[M-H]-	265410	263830	233240	207850	304610	223580	264420	250400	295210	208180	180040	218100	166.099	C10H14O2	[M-H]-	1-(4-Methoxyphenyl)-1-propanol	Phenolic acids	Phenolic acids
pmn001690	Negative	327.14	165.09	328.152	C16H24O7	[M-H]-	2955000	1855600	2230900	3163300	4096100	7189500	2795600	2709600	3457600	2760300	2790100	2344500	328.152	C16H24O7	[M-H]-	3-Hydroxy-4-isopropylbenzylalcohol-3-O-glucoside	Phenolic acids	Phenolic acids
pmn001695	Negative	371.1	249.06	372.106	C16H20O10	[M-H]-	5622.8	1999.5	69468	21374	5389.8	6609	2655	2653	7966.8	71802	66973	113030	372.106	C16H20O10	[M-H]-	Trihydroxycinnamoylquinic acid	Phenolic acids	Phenolic acids
pmn001710	Negative	521.13	359.08	522.137	C24H26O13	[M-H]-	56740	19226	36087	59499	80916	9	18232	58285	20369	444920	535840	659690	522.137	C24H26O13	[M-H]-	Rosmarinic acid-3'-O-glucoside	Phenolic acids	Phenolic acids
pmp000086	Positive	269.1	177.05	268.095	C13H16O6	[M+H]+	17595	43844	23730	31603	23187	42299	30685	23207	36580	35312	26230	9396	268.095	C13H16O6	[M+H]+	1-Feruloyl-sn-glycerol*	Phenolic acids	Phenolic acids
pmp000087	Positive	269.1	177.05	268.095	C13H16O6	[M+H]+	132160	111920	81613	138070	149620	201240	124230	108120	147490	177480	107020	130910	268.095	C13H16O6	[M+H]+	2-Feruloyl-sn-glycerol*	Phenolic acids	Phenolic acids
pmp000091	Positive	445.15	177.05	444.142	C23H24O9	[M+H]+	9	9	9	7866.4	9	9	9	9	9	9	9	9	444.142	C23H24O9	[M+H]+	1,3-O-Diferuloylglycerol*	Phenolic acids	Phenolic acids
pmp001285	Positive	149.02	65.04	148.016	C8H4O3	[M+H]+	30994	37247	48597	51675	33838	44366	38920	31803	36412	52788	35640	44413	148.016	C8H4O3	[M+H]+	Phthalic anhydride	Phenolic acids	Phenolic acids
Wmzn002116	Negative	515.12	353.09	516.127	C25H24O12	[M-H]-	9	9	413770	147290	9	9	9	9	9962.5	9	9	9	516.127	C25H24O12	[M-H]-	3,5-Dicaffeoylquinic acid*	Phenolic acids	Phenolic acids
Xmyn004302	Negative	449.24	259.06	450.21	C20H34O11	[M-H]-	525880	325660	423850	671950	657330	1482600	959160	881490	1308300	2470300	3367400	2891200	450.21	C20H34O11	[M-H]-	Ginkgoside A	Phenolic acids	Phenolic acids
Zmcn005156	Negative	529.13	353.08	530.142	C26H26O12	[M-H]-	9849	7799.2	34874	61760	26924	31068	30660	13888	24773	5209200	7190100	5552500	530.142	C26H26O12	[M-H]-	4,5-O-Dicaffeoylquinic Acid Methyl Ester*	Phenolic acids	Phenolic acids
Zmhn000593	Negative	785.25	785.25	786.258	C35H46O20	[M-H]-	113190	61852	211630	161550	92687	209770	61522	153180	154600	76023	162110	46632	786.258	C35H46O20	[M-H]-	Magnoloside B	Phenolic acids	Phenolic acids
Zmhn000892	Negative	301.09	139.05	302.1	C13H18O8	[M-H]-	249120	196910	282220	312150	353630	490440	298760	344140	500360	442590	475550	490150	302.1	C13H18O8	[M-H]-	4-O-Glucosyl-3,4-dihydroxybenzyl alcohol	Phenolic acids	Phenolic acids
Zmhn001358	Negative	299.08	137.02	300.084	C13H16O8	[M-H]-	348190	193800	1331200	1034100	103920	255250	92536	144830	354130	707600	849280	917310	300.084	C13H16O8	[M-H]-	4-O-Glucosyl-4-hydroxybenzoic acid	Phenolic acids	Phenolic acids
Zmhn001793	Negative	341.09	179.03	342.096	C15H18O9	[M-H]-	3404600	4585600	3831100	3641700	3113000	5513200	1678800	2104600	3329500	4676700	3888700	5749600	342.096	C15H18O9	[M-H]-	6-O-Caffeoyl-D-glucose*	Phenolic acids	Phenolic acids
Zmhn001883	Negative	329.09	209.04	330.095	C14H18O9	[M-H]-	149750	128180	29150	46585	80723	6008.3	80877	175480	41217	1458000	1991600	1597400	330.095	C14H18O9	[M-H]-	Vanillic acid-4-O-glucoside	Phenolic acids	Phenolic acids
Zmhn001926	Negative	299.08	137.02	300.084	C13H16O8	[M-H]-	200630	83640	743890	755140	109140	210760	102000	84210	206750	1582400	1868600	2437400	300.084	C13H16O8	[M-H]-	1-O-Salicyloyl-β-D-glucose	Phenolic acids	Phenolic acids
Zmhn002227	Negative	385.11	223.06	386.121	C17H22O10	[M-H]-	244470	436790	479900	907320	730250	895500	352130	580370	588010	7675600	6331900	7240100	386.121	C17H22O10	[M-H]-	4-O-Glucosyl-sinapate	Phenolic acids	Phenolic acids
Zmhn002301	Negative	325.09	163.04	326.1	C15H18O8	[M-H]-	1456200	1191100	1139200	1361100	1043600	2326800	1146300	1785400	1293100	958420	858070	896710	326.1	C15H18O8	[M-H]-	p-Coumaric acid-4-O-glucoside*	Phenolic acids	Phenolic acids
Zmhn002334	Negative	355.1	193.05	356.111	C16H20O9	[M-H]-	3297	4383.4	187560	140350	20640	18986	11234	31250	10630	43061	128270	89418	356.111	C16H20O9	[M-H]-	6-O-Feruloyl-D-glucose	Phenolic acids	Phenolic acids
Zmhn004909	Negative	477.06	169.01	478.075	C21H18O13	[M-H]-	9	9	9	18854	9	9	9	5968	9	9	9	9	478.075	C21H18O13	[M-H]-	3,4-Digalloylshikimic acid	Phenolic acids	Phenolic acids
Zmhn005413	Negative	335.04	183.03	336.048	C15H12O9	[M-H]-	9	22063	13030	60280	57221	9	145530	294610	16476	9	9	84335	336.048	C15H12O9	[M-H]-	p-Dimeric galloyl methyl ester	Phenolic acids	Phenolic acids
HJN049	Negative	575.12	449.09	576.126	C30H24O12	[M-H]-	3192.5	2342.2	6356.2	10183	3158.8	8820.8	13559	8753.5	8017.5	2243800	2899100	2232100	576.126	C30H24O12	[M-H]-	2α,3α-Epoxy-5,7,3',4'-tetrahydroxyflavan-(4β-8-catechin)*	Tannins	Proanthocyanidins
HJN053	Negative	575.12	449.09	576.126	C30H24O12	[M-H]-	5313.2	9	9	9808.8	9	5304.5	11244	9	9846.5	1675300	2835600	2039100	576.126	C30H24O12	[M-H]-	2α,3α-Epoxy-5,7,3',4'-tetrahydroxyflavan-(4β-8-epicatechin)*	Tannins	Proanthocyanidins
HJN074	Negative	591.15	289.07	592.158	C31H28O12	[M-H]-	9	9	9	9	9	9	9	9	9	83428	146750	176340	592.158	C31H28O12	[M-H]-	Procyanidin A6	Tannins	Proanthocyanidins
Hmln003405	Negative	447.06	315.01	448.064	C20H16O12	[M-H]-	9	9	11857	11594	9	9	9	9	9	9	9	5441	448.064	C20H16O12	[M-H]-	Ellagic acid-4-O-rhamnoside	Tannins	Tannin
mws0836	Negative	577.14	425.1	578.142	C30H26O12	[M-H]-	5928.5	9	9	9	9	9	9	15691	9	1742200	3325300	2505100	578.142	C30H26O12	[M-H]-	Procyanidin B1	Tannins	Proanthocyanidins
MWSslk094	Negative	593.13	125.03	594.137	C30H26O13	[M-H]-	4505.5	9062.5	19110	18264	4518.2	9	4489	9	9034.5	90416	108460	106260	594.137	C30H26O13	[M-H]-	Proanthocyanidins	Tannins	Proanthocyanidins
pme0432	Negative	575.12	285.01	576.127	C30H24O12	[M-H]-	5595.5	9	11863	11818	9	9	11897	3548	9	1985000	3660100	2418400	576.127	C30H24O12	[M-H]-	Procyanidin A2	Tannins	Proanthocyanidins
pme0434	Negative	577.14	407.1	578.142	C30H26O12	[M-H]-	469400	405970	636040	487760	559060	118500	448520	1883100	190770	31255000	41778000	41710000	578.142	C30H26O12	[M-H]-	Procyanidin B2	Tannins	Proanthocyanidins
pme0436	Negative	577.14	407.1	578.142	C30H26O12	[M-H]-	367560	413990	505950	414770	574070	87640	429040	1771800	165700	29437000	39814000	41904000	578.142	C30H26O12	[M-H]-	Procyanidin B3	Tannins	Proanthocyanidins
pmn001646	Negative	865.2	577.1	866.206	C45H38O18	[M-H]-	46544	40167	60459	36384	56182	23603	66462	163570	26728	2848500	3199500	4042000	866.206	C45H38O18	[M-H]-	Procyanidin C1*	Tannins	Proanthocyanidins
pmn001647	Negative	865.2	713.2	866.206	C45H38O18	[M-H]-	39152	24076	41410	41021	37085	13660	37270	156710	32330	2227000	2221300	3340600	866.206	C45H38O18	[M-H]-	Procyanidin C2*	Tannins	Proanthocyanidins
pmn001648	Negative	863.18	411.1	864.19	C45H36O18	[M-H]-	5010	5565	14900	8029.2	4000.5	4979.5	8754	16845	9420.5	1304300	1992000	1368000	864.19	C45H36O18	[M-H]-	Cinnamtannin D1	Tannins	Tannin
pmn001649	Negative	1153.26	1001.2	1154.27	C60H50O24	[M-H]-	9	9	9	9	9	9	9	9	9	95730	140780	96997	1154.27	C60H50O24	[M-H]-	Cinnamtannin A2	Tannins	Tannin
pmn001650	Negative	1153.26	575.1	1154.27	C60H50O24	[M-H]-	9	9	9	9	9	3983.5	9	15231	9	195900	392560	346690	1154.27	C60H50O24	[M-H]-	Cinnamtannin B2	Tannins	Tannin
pmn001667	Negative	577.14	407.1	578.142	C30H26O12	[M-H]-	33855	18875	17138	54810	27711	7137	30346	74756	17809	3827700	6723200	6493800	578.142	C30H26O12	[M-H]-	Procyanidin B4	Tannins	Proanthocyanidins
pmp000275	Positive	581.17	139.04	580.158	C30H28O12	[M+H]+	9	9	9	9	9	9	9	9	9	42030	73828	90340	580.158	C30H28O12	[M+H]+	Gambiriin A1	Tannins	Tannin
Zmwp002963	Positive	865.19	713.15	864.19	C45H36O18	[M+H]+	9	9	9	9	9	9	9	9	9	344490	534150	527000	864.19	C45H36O18	[M+H]+	Aesculitannin B	Tannins	Tannin
Cmcp006262	Positive	505.35	423.33	504.345	C30H48O6	[M+H]+	9	9	9	9	9	9	9	9	9	48809	62619	55840	504.345	C30H48O6	[M+H]+	Roxburic Acid	Terpenoids	Triterpene
HJN110	Negative	455.36	455.36	456.36	C30H48O3	[M-H]-	29393	7876.4	22700	180360	184500	72118	55553	91461	93413	1428800	1103300	1639500	456.36	C30H48O3	[M-H]-	Betulinic acid	Terpenoids	Triterpene
Hmhn007023	Negative	503.34	485.33	504.345	C30H48O6	[M-H]-	16976	8877.6	34923	101110	103940	18872	8203.2	21017	4797.4	10838000	12402000	10667000	504.345	C30H48O6	[M-H]-	2α,3α,19α-Trihydroxyursolic acid	Terpenoids	Triterpene
Hmjn003948	Negative	487.35	487.35	488.35	C30H48O5	[M-H]-	91494	34759	426270	1417400	2025600	394390	252140	281810	173400	13103000	10654000	13154000	488.35	C30H48O5	[M-H]-	Madasiatic acid	Terpenoids	Triterpene
Hmjn008136	Negative	469.33	469.33	470.34	C30H46O4	[M-H]-	71533	30883	39277	83236	104530	67022	50113	58484	80653	1808300	1675600	2114800	470.34	C30H46O4	[M-H]-	Camaldulenic acid	Terpenoids	Triterpene
Hmjp003546	Positive	505.35	469.33	504.346	C30H48O6	[M+H]+	9	9	5460.4	13665	5922.7	9	9	9	9	289360	414650	401240	504.346	C30H48O6	[M+H]+	Madecassic acid	Terpenoids	Triterpene
Hmln003605	Negative	503.34	485.33	504.346	C30H48O6	[M-H]-	7669.3	3602.1	127550	257920	144280	51383	30441	52959	28108	4809000	4458800	4854000	504.346	C30H48O6	[M-H]-	Myrianthic acid	Terpenoids	Triterpene
Li512114	Negative	485.36	453.34	486.371	C31H50O4	[M-H]-	10053	2305.4	2579	2760.6	1975.9	907.34	1194.8	1400.2	2364.2	171250	195600	260500	486.371	C31H50O4	[M-H]-	Corosolic Acid Methyl Ester	Terpenoids	Triterpene
Lmqp012453	Positive	441.37	191.18	440.365	C30H48O2	[M+H]+	9	9	5707.8	12715	3751.6	1744.1	9	9	9	1011000	1202000	1470500	440.365	C30H48O2	[M+H]+	Ursolaldehyde	Terpenoids	Triterpene
Lmsn006046	Negative	665.39	503.34	666.398	C36H58O11	[M-H]-	22971	20054	8353.5	24438	18592	50308	8765.2	21870	24822	29188	22748	10164	666.398	C36H58O11	[M-H]-	2α,3β,19α,23-Tetrahydroxyurs-12-en-28-oic acid-28-O-glucoside	Terpenoids	Triterpene Saponin
Lmsn007400	Negative	663.38	501.32	664.382	C36H56O11	[M-H]-	9	9	9	7726.7	14384	9	9	9	5550.8	53812	118290	73024	664.382	C36H56O11	[M-H]-	Rubuside J	Terpenoids	Triterpene Saponin
Lmsn008066	Negative	519.33	457.33	520.34	C30H48O7	[M-H]-	9	9	9	4790.4	9	9	9	9	9	800380	726570	1035400	520.34	C30H48O7	[M-H]-	1β,2α,3α,19α,23-Pentahydroxyurs-12-en-28-oic acid	Terpenoids	Triterpene
Lmsn008888	Negative	517.32	407.3	518.324	C30H46O7	[M-H]-	9	9	9	9	9	9	9	9	9	16079	15142	9912.9	518.324	C30H46O7	[M-H]-	2α,3β,19α-Trihydroxyolean-12-en-23,28-dioic acid	Terpenoids	Triterpene
Lmsn008908	Negative	519.33	457.33	520.34	C30H48O7	[M-H]-	9	9	9	9	9	9	9	9	9	701660	746890	727220	520.34	C30H48O7	[M-H]-	2α,3β,19α,23,24-Pentahydroxyolean-12-en-28-oic acid	Terpenoids	Triterpene
Lmsn010659	Negative	485.33	439.32	486.335	C30H46O5	[M-H]-	9	9	9	4704.8	2800.5	9	9	9	9	174030	168530	205880	486.335	C30H46O5	[M-H]-	Annurcoic acid	Terpenoids	Triterpene
Lmsn011830	Negative	485.33	485.33	486.335	C30H46O5	[M-H]-	9	9	23685	88508	45889	36123	7764.7	10516	3765.9	916800	944340	1027100	486.335	C30H46O5	[M-H]-	2α,19α-Dihydroxy-3-oxours-12-en-28-oic acid	Terpenoids	Triterpene
Lmsn011870	Negative	665.39	485.33	666.398	C36H58O11	[M-H]-	22266	10697	557710	1484800	592830	740480	183590	185870	79966	12047000	12600000	11256000	666.398	C36H58O11	[M-H]-	Nigaichigoside F1	Terpenoids	Triterpene Saponin
Lmsn012480	Negative	483.31	421.31	484.319	C30H44O5	[M-H]-	9	9	9	9182	9	9	9	9	9	746570	653690	647140	484.319	C30H44O5	[M-H]-	Fupenzic acid	Terpenoids	Triterpene
Lmsn012627	Negative	469.33	423.33	470.34	C30H46O4	[M-H]-	3190.6	792.76	856.05	3943.6	4546.2	1583.4	1983.2	1716.8	3946.5	56137	55938	81683	470.34	C30H46O4	[M-H]-	2α,3α-Dihydroxyurs-12,18-dien-28-oic acid	Terpenoids	Triterpene
Lmsn013282	Negative	469.33	407.33	470.34	C30H46O4	[M-H]-	9	9	9	9	9	9	9	9	9	46864	47503	62072	470.34	C30H46O4	[M-H]-	Pomonic Acid	Terpenoids	Triterpene
Lmsp010222	Positive	457.33	203.14	456.324	C29H44O4	[M+H]+	9	9	9	2733.3	9	9	9	9	9	259360	278410	299850	456.324	C29H44O4	[M+H]+	Rubuminatus A	Terpenoids	Triterpene
Lmsp013238	Positive	455.35	301.22	454.345	C30H46O3	[M+H]+	36707	16535	10353	2836.5	1624.7	652.72	410.23	1650	843.36	14443	29432	40007	454.345	C30H46O3	[M+H]+	3β-Hydroxy-urs-11-en-28,13β-lactone	Terpenoids	Triterpene
Lmyp004084	Positive	153.13	107.09	152.12	C10H16O	[M+H]+	9	11482	7956.8	13460	13703	21008	13776	20207	12311	35375	29185	42755	152.12	C10H16O	[M+H]+	Perillyl alcohol	Terpenoids	Monoterpenoids
Lmzn006284	Negative	471.35	471.35	472.355	C30H48O4	[M-H]-	199080	75952	112590	2277600	3259400	1650300	641540	520990	489110	6961000	7271600	6469100	472.355	C30H48O4	[M-H]-	2α-Hydroxyursolic acid*	Terpenoids	Triterpene
Lmzn006582	Negative	469.34	469.34	470.34	C30H46O4	[M-H]-	9	9	9	165260	309510	586290	92484	25535	58110	1924600	2182700	2252200	470.34	C30H46O4	[M-H]-	Colubrinic acid	Terpenoids	Triterpene
mws1610	Negative	471.35	471.35	472.355	C30H48O4	[M-H]-	182210	81036	141510	2215200	3373400	1616800	661240	461430	459310	6214300	6488600	5552800	472.355	C30H48O4	[M-H]-	Maslinic acid*	Terpenoids	Triterpene
mws4053	Negative	455.35	455.35	456.36	C30H48O3	[M-H]-	30019	8249	24912	168870	145820	76274	48068	87408	85857	1432500	1192800	1615500	456.36	C30H48O3	[M-H]-	Ursolic acid	Terpenoids	Triterpene
MWSCX013	Positive	489.35	201.16	488.35	C30H48O5	[M+H]+	9319.7	4339	137570	259430	245390	139810	44937	59995	31541	2991800	2974300	2882100	488.35	C30H48O5	[M+H]+	Euscaphic acid*	Terpenoids	Triterpene
MWSmce052	Negative	455.36	455.36	456.36	C30H48O3	[M-H]-	39028	8462.9	7780.9	29108	25965	60277	39366	68551	136310	1526600	824800	1197900	456.36	C30H48O3	[M-H]-	3-Epiursolic acid	Terpenoids	Triterpene
MWSmce394	Negative	487.34	469.33	488.35	C30H48O5	[M-H]-	136040	77446	873220	2150100	1457700	602020	281870	436040	165990	13876000	14478000	15135000	488.35	C30H48O5	[M-H]-	Tormentic acid	Terpenoids	Triterpene
MWSmce560	Negative	471.35	441.33	472.355	C30H48O4	[M-H]-	9	9	9	9	9	9	9	9	9	41905	45087	48423	472.355	C30H48O4	[M-H]-	23-Hydroxybetulinic acid	Terpenoids	Triterpene
pmn001505	Negative	763.43	763.4	764.435	C41H64O13	[M-H]-	9	9	33839	27122	7896.5	10621	9	9	9652.6	9	9	9	764.435	C41H64O13	[M-H]-	Oleanolic acid-3-O-xylosyl(1→3)glucuronide	Terpenoids	Triterpene Saponin
pmn001700	Negative	455.35	455.35	456.36	C30H48O3	[M-H]-	32009	11355	30823	145620	188160	62446	56967	80581	82924	1294500	1076700	1399400	456.36	C30H48O3	[M-H]-	24,30-Dihydroxy-12(13)-enolupinol	Terpenoids	Triterpene
pmn001703	Negative	469.33	433.31	470.34	C30H46O4	[M-H]-	5533.3	4050.6	4974.5	3374.9	812.05	4057.5	2346.2	4008.4	3779.9	3495.7	1829.3	1881.6	470.34	C30H46O4	[M-H]-	Hyptadienic acid	Terpenoids	Triterpene
pmn001708	Negative	487.34	425.34	488.35	C30H48O5	[M-H]-	6699.4	4762.5	286110	623950	135870	83803	74008	101830	29673	6543600	8314300	8352700	488.35	C30H48O5	[M-H]-	Asiatic acid	Terpenoids	Triterpene
pmp000263	Positive	455.35	409.35	454.345	C30H46O3	[M+H]+	27931	13308	18659	74176	94596	20365	24151	40254	33323	582430	735680	808570	454.345	C30H46O3	[M+H]+	Sanguisorbigenin	Terpenoids	Triterpene
pmp000267	Positive	485.33	233.15	484.319	C30H44O5	[M+H]+	9	9	9	9	9	9	9	9	9	45982	53999	68755	484.319	C30H44O5	[M+H]+	3,11-Dioxo-19α-hydroxyurs-12-en-28-oic acid	Terpenoids	Triterpene
pmp000268	Positive	487.34	405.31	486.335	C30H46O5	[M+H]+	3504.8	9	58386	174880	88223	79481	20365	23033	8527	2674900	3270200	2868900	486.335	C30H46O5	[M+H]+	Rosamultic acid	Terpenoids	Triterpene
pmp000269	Positive	489.36	407.33	488.35	C30H48O5	[M+H]+	3464.1	1663.4	52021	155030	111580	58674	17897	30631	14326	1353100	1578100	1472500	488.35	C30H48O5	[M+H]+	Arjunic Acid*	Terpenoids	Triterpene
pmp000270	Positive	501.32	233.15	500.314	C30H44O6	[M+H]+	9	9	9	9	9	9	9	9	9	99858	90836	108000	500.314	C30H44O6	[M+H]+	Lup-12-en-15α,19β-diol-3,11-dioxo-28-oic acid	Terpenoids	Triterpene
pmp000436	Positive	427.39	409.38	426.386	C30H50O	[M+H]+	9	9	9	9	9	9	9	9	9	21564	24562	9	426.386	C30H50O	[M+H]+	Taraxerol	Terpenoids	Triterpene
pmp000780	Positive	665.4	409.3	664.398	C40H56O8	[M+H]+	9	9	9	9	9	9	9	9	9	18891	14667	18891	664.398	C40H56O8	[M+H]+	3-O-Trans-feruloyl euscaphic acid	Terpenoids	Triterpene
pmp000781	Positive	619.4	437.34	618.392	C39H54O6	[M+H]+	9	9	9	9	9	9	9	681.21	9	10398	10327	10135	618.392	C39H54O6	[M+H]+	p-Coumaroyleuscaphic acid	Terpenoids	Triterpene
Smnp010489	Positive	635.39	453.33	634.387	C39H54O7	[M+H]+	4195.7	558.25	3769.3	51324	94897	21828	3924.2	4917.3	3878.6	1029500	1153100	985480	634.387	C39H54O7	[M+H]+	3-O-cis-Coumaroyltormentic acid	Terpenoids	Triterpene
Smpp009685	Positive	651.38	163.03	650.382	C39H54O8	[M+H]+	9	9	9	9	9	9	9	9	9	39371	52997	41029	650.382	C39H54O8	[M+H]+	3-O-trans-cafeoyltormentic acid	Terpenoids	Triterpene
Zmpn008194	Negative	471.35	471.35	472.355	C30H48O4	[M-H]-	66795	25944	217930	1990900	2334200	1321300	288000	349610	142760	15225000	17329000	15381000	472.355	C30H48O4	[M-H]-	Corosolic acid*	Terpenoids	Triterpene
