# Supplementary material
Source: MDPI journal article supplement (https://www.mdpi.com/2311-7524/9/7/818)
Supplement: s1 [file s1 › Table S2.xlsx]

## Sheet: Sheet1
Table S2 Differential metabolites among normal and cork spotted tissues
name	compounds	Class	log2(DS/HQ)	Pvalue	vip	log2(DS/G)	Pvalue	vip	log2(DS/DN)	Pvalue	vip
pma2987	Histidinol	Alkaloids	0.587373	0.00237497	1.71193	0.319715	0.0205825	1.33038	0.561395	0.00627757	1.66855
pme2268	Trigonelline	Alkaloids	2.08571	0.0186857	1.06601	2.58689	0.0034805	1.19856	4.38946	0.00119032	1.24422
pme2914	3-Hydroxy-3-methylpentane-1,5-dioic acid	Amino acids and derivatives	1.47453	0.0020483	2.414	1.29604	0.0104355	2.39309	0.834112	0.016605	1.93556
Lmtn002796	Aromadendrin-7-O-glucoside	Flavonoids	2.72839	0.000107606	1.61073	1.25054	0.00763016	1.34275	1.40031	0.00136117	1.3809
Jmgn004021	6-C-Glucosyl-2-Hydroxynaringenin	Flavonoids	2.72928	0.00280923	1.55658	1.67325	0.016127	1.40305	1.46369	0.00894638	1.33111
Lmmn004625	Dihydrokaempferol-7-O-glucoside	Flavonoids	3.94395	0.000239719	1.18281	2.5294	0.00106907	1.15303	2.63323	0.000364217	1.1304
HJN086	Eriodictyol-3'-O-glucoside	Flavonoids	4.10565	0.00203447	1.14819	2.69235	0.0041365	1.12076	2.66306	0.00308938	1.08402
pmn001415	Catechin-(7,8-bc)-4β-(3,4-dihydroxyphenyl)-dihydro-2-(3H)-one	Flavonoids	4.25094	0.00431197	2.11129	3.57473	0.00520131	2.17574	3.59648	0.00517181	2.09318
mws1179	Naringenin-7-O-glucoside (Prunin)*	Flavonoids	5.45162	0.0110554	1.50145	4.30912	0.0124012	1.53129	4.28065	0.0122563	1.46951
mws0061	Quercetin-3-O-galactoside (Hyperin)*	Flavonoids	2.78221	0.00760383	2.52055	2.97016	0.00554945	2.66637	4.42474	0.000975612	2.71014
mws1329	Quercetin-7-O-glucoside*	Flavonoids	3.05067	0.0178472	1.95918	3.3872	0.0137373	2.06768	4.50951	0.00845874	2.05407
mws0856	Quercetin-4'-O-glucoside (Spiraeoside)*	Flavonoids	2.83291	0.0237446	1.81157	3.36419	0.0152804	1.9411	4.51916	0.00961296	1.92828
pme1598	Hesperetin-5-O-glucoside	Flavonoids	3.18609	0.0174593	2.07801	3.48152	0.014376	2.19236	4.60213	0.00939194	2.1654
MWSHY0046	Quercetin-3-O-glucoside (Isoquercitrin)*	Flavonoids	3.16367	0.0295084	1.50727	3.64585	0.0236048	1.59408	4.70086	0.0180491	1.56688
Lmdp003286	Isohyperoside*	Flavonoids	3.18507	0.0190932	1.57542	3.63041	0.0148001	1.66879	4.81045	0.0104058	1.64443
pmb2947	Catechin-catechin-catechin	Flavonoids	6.46129	0.00091978	2.08967	6.32178	0.000924197	2.18197	5.27574	0.000992013	2.08571
HJN044	Epicatechin-(4β→8,2β→O→7)-epicatechin-(4β→8)-epicatechin	Flavonoids	9.14631	0.00118204	1.2304	7.39563	0.00120205	1.28085	6.82989	0.00122601	1.23155
mws1000	Fustin	Flavonoids	7.07091	0.000107724	1.83414	6.40799	0.000112336	1.92101	7.1921	0.00010741	1.85734
pme0460	Epicatechin*	Flavonoids	8.1909	0.0071985	4.3301	7.28181	0.00728226	4.49579	8.05747	0.0072066	4.32056
MWSHY0167	Catechin*	Flavonoids	8.20626	0.00539253	3.98336	8.06848	0.00540032	4.15222	8.11002	0.00539746	3.98656
Lmmn002260	5'-Methoxyisolariciresinol-9'-O-glucoside	Lignans and Coumarins	2.3702	0.000753252	1.73036	1.1432	0.023366	1.41213	1.31164	0.00279838	1.52115
Zmcn003729	1-Hydroxypinoresinol-4'-O-Glucoside	Lignans and Coumarins	3.99784	0.000558669	1.65415	3.13509	0.000716276	1.68758	3.56638	0.000609873	1.6551
Hmln002100	Nortrachelogenin-4-O-glucoside	Lignans and Coumarins	4.33633	0.000103167	1.04645	3.78279	0.000130642	1.08507	3.64552	0.000123312	1.04432
pmn001375	1-Hydroxypinoresinol-1-O-Glucoside	Lignans and Coumarins	4.2975	0.00167823	2.34411	3.61858	0.00193566	2.39969	4.01715	0.00174253	2.3407
Hmqn002118	Umbelliferone	Lignans and Coumarins	4.34098	0.000238835	1.09183	3.53493	0.000395881	1.11858	4.25547	0.00021593	1.10221
pmn001378	Pinoresinol-4-O-glucoside	Lignans and Coumarins	4.77946	0.0125088	1.83434	3.71546	0.0144537	1.85323	5.56983	0.0118104	1.83839
Lmgp003270	Scopoletin-7-O-glucuronide	Lignans and Coumarins	4.71726	0.0101713	2.76964	5.0972	0.00948521	2.88526	6.6467	0.00870486	2.7988
mws0097	Pinoresinol*	Lignans and Coumarins	8.52241	0.0315156	1.10424	7.80015	0.0316941	1.13654	10.7759	0.0313043	1.08992
pmp000021	Isooxypeucedanine	Lignans and Coumarins	16.6033	0.00281704	1.02544	8.80548	0.00284156	1.0682	16.6033	0.00281704	1.02827
Lmdn004267	Epipinoresinol*	Lignans and Coumarins	8.74483	0.0275688	1.1292	7.27931	0.0279445	1.16101	17.0078	0.0273662	1.1161
mws0126	LysoPC 18:0	Lipids	1.80621	0.00287055	1.41524	1.74417	0.0018821	1.46635	2.22106	0.00116764	1.49932
Lmhp010190	LysoPC 18:1(2n isomer)	Lipids	1.36532	0.00296853	1.72891	1.84995	0.000687876	1.97483	2.33123	0.000440205	2.0041
pmp001281	LysoPC 18:1	Lipids	1.44448	0.00107461	1.82173	2.02142	0.000249438	2.08997	2.42755	0.000175975	2.095
Lmyn012331	Petroselinic acid	Lipids	1.99019	0.000850697	2.20658	2.23694	0.0010033	2.40513	2.51275	0.000827286	2.38025
mws2623	11-Octadecanoic acid(Vaccenic acid)	Lipids	2.0311	0.000266438	2.25078	2.24004	0.000464156	2.43075	2.55566	0.000272412	2.4079
Rfmb091	9S-Hydroxy-10E,12Z-octadecadienoic acid*	Lipids	2.14161	0.00334138	1.2324	2.08411	0.00272068	1.29543	2.66366	0.00210531	1.32014
Lmbn005369	13(S)-HODE;13(S)-Hydroxyoctadeca-9Z,11E-dienoic acid*	Lipids	2.19717	0.00251418	1.22618	2.14606	0.00175868	1.29007	2.7696	0.00134452	1.31365
pmb0889	Punicic acid (9Z,11E,13Z-octadecatrienoic acid)	Lipids	3.48137	0.000252256	1.44108	3.76308	0.000157248	1.52893	4.16968	0.00014761	1.49227
pmn001694	9,10,13-Trihydroxy-11-Octadecenoic Acid	Lipids	4.44146	0.00192764	1.94555	4.8543	0.00181972	2.04451	5.58932	0.00171574	1.98151
pmc0274	6-Methylmercaptopurine	Nucleotides and derivatives	-1.16391	0.00157307	2.82321	-0.858419	0.0231369	2.28958	-0.840401	0.0128275	2.24396
Lmbn001754	3-Isopropylmalic Acid*	Organic acids	1.23704	0.00148732	3.27171	1.08683	0.0394313	2.99925	0.777101	0.0107128	2.71117
pmb2826	L-Citramalic acid*	Organic acids	2.56945	0.00192738	1.21212	1.71674	0.00589369	1.14603	2.22323	0.00408314	1.18013
mws0237	Azelaic acid	Organic acids	1.76026	0.0186737	1.32715	2.40419	0.00968835	1.52891	2.27519	0.0102772	1.45937
pmf0174	1-Decanol*	Saccharides and Alcohols	-2.69935	1.37073e-06	3.07738	-2.75689	5.07662e-06	3.31342	-2.72346	3.8445e-06	3.15529
pmf0175	2-Decanol*	Saccharides and Alcohols	-2.06564	1.33331e-05	2.96804	-2.13191	1.01086e-05	3.20807	-2.1206	8.59415e-07	3.0873
pme0534	Gluconic acid	Saccharides and Alcohols	1.39922	0.0231234	2.21034	1.48002	0.021065	2.35072	1.25017	0.0291793	2.11032
pma1751	N-(beta-D-Glucosyl)nicotinate	Others	1.61046	0.0257734	1.70751	2.17831	0.0157687	1.94026	2.10089	0.0184987	1.82711
Hmtn001120	5-(2-Hydroxyethyl)-2-O-glucosylphenol	Phenolic acids	1.25825	0.00101791	1.22842	0.726088	0.0115651	1.03293	0.975788	0.00251646	1.14587
Lmmn001294	Koaburaside	Phenolic acids	1.29888	0.00141127	1.03225	1.07963	0.00256993	1.01463	1.30685	0.00234167	1.04013
Xmyn004302	Ginkgoside A	Phenolic acids	2.77486	0.000726287	1.71504	1.63426	0.00632674	1.55301	1.47093	0.00305538	1.47984
Lmtn002233	Androsin	Phenolic acids	1.79794	0.00048062	1.78099	0.920463	0.00495626	1.50349	1.57317	0.00152665	1.73721
mws0458	Vanillin; 4-Hydroxy-3-Methoxybenzaldehyde	Phenolic acids	1.83786	6.15784e-05	1.20415	1.15742	0.000893929	1.09234	1.68153	5.26621e-05	1.19624
pmb3107	Glucosyringic Acid	Phenolic acids	2.66499	0.00238052	2.33193	2.12764	0.00361357	2.32963	2.24949	0.00295427	2.2761
Jmwn002620	Vanillic Acid-4-O-Glucuronide	Phenolic acids	2.3794	0.0118184	3.38677	2.22749	0.018962	3.44813	3.54308	0.00353118	3.6502
Zmhn002227	4-O-Glucosyl-sinapate	Phenolic acids	4.19366	7.64117e-05	2.79462	3.06834	9.86274e-05	2.84595	3.80467	8.28154e-05	2.83408
Lman002731	Grevilloside F	Phenolic acids	3.52547	0.000616136	1.22078	2.8301	0.000875152	1.2346	3.84927	0.000569082	1.2438
Zmhn001926	1-O-Salicyloyl-β-D-glucose	Phenolic acids	2.51781	0.00743067	1.36348	2.45349	0.00754043	1.43152	3.90542	0.00196468	1.48755
pmn001382	Isochlorogenic acid A*	Phenolic acids	4.45264	4.95061e-08	7.27173	3.44299	1.2468e-05	7.45407	3.94345	2.6792e-07	7.32789
pmn001384	Isochlorogenic acid C*	Phenolic acids	4.34241	2.77111e-06	7.08265	3.30832	2.22332e-05	7.23361	3.95539	3.90695e-06	7.15057
mws0906	Coniferin	Phenolic acids	2.5657	0.00161171	2.18522	2.33855	0.00726266	2.22284	4.02494	0.000704102	2.34429
Zmhn001883	Vanillic acid-4-O-glucoside	Phenolic acids	4.03874	0.000649802	1.36475	5.2425	0.000528823	1.45584	4.08411	0.000654423	1.37756
Lmgp003989	Dicaffeoylshikimic acid	Phenolic acids	4.86324	0.000126994	2.20388	3.84881	0.000209291	2.26925	4.27306	0.000144716	2.21332
Hmhn003518	4-O-β-D-glucopyranosylferulic acid*	Phenolic acids	5.31419	0.00393905	5.58927	4.0131	0.00451596	5.71938	4.31561	0.0042826	5.52739
Lmsn003318	1-O-Feruloyl-β-D-glucose*	Phenolic acids	5.39736	0.00502095	5.21749	4.05482	0.00576293	5.32216	4.43994	0.00541451	5.14876
Li512115	Isochlorogenic acid B*	Phenolic acids	4.90155	0.000163024	3.13268	4.26748	0.000188605	3.25469	4.98303	0.000157832	3.17451
Lmtn002565	1-O-Vanilloyl-D-Glucose	Phenolic acids	5.92864	4.19728e-05	1.0284	4.79198	4.90072e-05	1.069	5.05238	4.47901e-05	1.03471
pma3724	1-O-Feruloylquinic acid	Phenolic acids	4.6948	0.00752711	3.32926	5.00034	0.00703427	3.47093	6.87636	0.00632177	3.37404
Lmjp003731	3,4-O-Dicaffeoylquinic Acid Methyl Ester*	Phenolic acids	9.72136	1.81686e-07	1.31642	7.58934	2.0953e-07	1.38163	7.92663	1.90015e-07	1.33776
Zmcn005156	4,5-O-Dicaffeoylquinic Acid Methyl Ester*	Phenolic acids	8.41699	0.000617066	2.65631	7.22793	0.000626252	2.76842	8.01662	0.000619144	2.67383
Lmyn003835	4-(3,4,5-Trihydroxybenzoxy)benzoic acid	Phenolic acids	7.80098	0.00181221	2.72792	7.50773	0.00182156	2.84104	8.17601	0.00180533	2.74583
Lmjp003822	3,5-O-Dicaffeoylquinic Acid Methyl Ester*	Phenolic acids	9.09417	0.00011016	1.31936	7.6768	0.000111897	1.38274	17.3075	0.000109205	1.33742
pmn001647	Procyanidin C2*	Tannins	6.21794	0.00233623	1.71957	6.40732	0.00232301	1.82132	5.10505	0.00253425	1.74099
pmn001646	Procyanidin C1*	Tannins	6.0993	0.000726394	1.97676	6.44056	0.000718325	2.08713	5.29636	0.000776993	1.99863
pme0434	Procyanidin B2	Tannins	6.24637	0.00041795	6.70745	6.62154	0.000413934	7.04491	5.50747	0.000451711	6.74452
pme0436	Procyanidin B3	Tannins	6.43186	0.000685271	6.5981	6.69011	0.000681881	6.93104	5.55365	0.000734712	6.63407
pmn001648	Cinnamtannin D1	Tannins	7.51643	0.00213741	1.34328	8.0992	0.00212211	1.39974	7.05736	0.00215369	1.34584
pmn001667	Procyanidin B4	Tannins	7.93048	0.00367903	2.57359	7.57068	0.00369611	2.68941	7.11557	0.0037237	2.5811
HJN049	2α,3α-Epoxy-5,7,3',4'-tetrahydroxyflavan-(4β-8-catechin)*	Tannins	9.27664	0.000370118	1.70339	8.37837	0.000372183	1.77876	7.92575	0.000373774	1.71618
HJN053	2α,3α-Epoxy-5,7,3',4'-tetrahydroxyflavan-(4β-8-epicatechin)*	Tannins	10.2628	0.00311991	1.59479	8.75867	0.00313748	1.6585	8.27814	0.00314833	1.59503
mws0836	Procyanidin B1	Tannins	10.3145	0.00526634	1.7095	18.0975	0.00525131	1.77897	8.91305	0.00529202	1.70712
pme0432	Procyanidin A2	Tannins	8.85059	0.00591417	1.75578	9.41208	0.0058995	1.82373	9.02728	0.00590889	1.75281
mws1610	Maslinic acid*	Terpenoids	5.49515	2.87003e-05	2.6491	1.3412	0.00326454	2.13672	3.52854	4.11661e-05	2.59892
Lmzn006284	2α-Hydroxyursolic acid*	Terpenoids	5.73895	8.85004e-06	2.82997	1.52623	0.00100079	2.3945	3.64778	1.17676e-05	2.78386
MWSmce052	3-Epiursolic acid	Terpenoids	6.00485	0.00457108	1.12057	4.94344	0.0048712	1.18074	3.86124	0.00576615	1.12662
pmn001700	24,30-Dihydroxy-12(13)-enolupinol	Terpenoids	5.66748	0.00020619	1.19854	3.2504	0.000383778	1.21016	4.09613	0.000242788	1.20325
HJN110	Betulinic acid	Terpenoids	6.12023	0.000927864	1.25499	3.25497	0.00148008	1.26647	4.11693	0.0011114	1.25973
mws4053	Ursolic acid	Terpenoids	6.06872	0.0003422	1.27293	3.43923	0.000515725	1.2932	4.26005	0.00040404	1.27922
Hmjn008136	Camaldulenic acid	Terpenoids	5.30425	0.000154298	1.46225	4.45772	0.000166853	1.52891	4.88673	0.000158406	1.48843
Lmzn006582	Colubrinic acid	Terpenoids	17.8456	2.8881e-05	1.5906	2.58341	0.000371132	1.51129	5.17421	3.47418e-05	1.59228
MWSmce394	Tormentic acid	Terpenoids	5.32262	5.83972e-06	4.10575	3.36882	2.23e-05	4.15917	5.62062	2.80803e-06	4.18212
Hmjn003948	Madasiatic acid	Terpenoids	6.06187	0.000130378	3.75915	3.26585	0.000318199	3.78277	5.70548	0.00012743	3.84248
Zmpn008194	Corosolic acid*	Terpenoids	7.26956	1.98794e-05	4.34691	3.08568	4.45752e-05	4.29344	5.94078	2.07096e-05	4.38245
MWSCX013	Euscaphic acid*	Terpenoids	5.87058	7.9307e-07	1.85453	3.77884	7.14301e-07	1.89344	6.0187	1.26575e-07	1.88758
pmp000269	Arjunic Acid*	Terpenoids	6.26786	2.71363e-05	1.31573	3.75894	4.31377e-05	1.33737	6.13057	2.4376e-05	1.33142
Lmsn011870	Nigaichigoside F1	Terpenoids	5.9256	1.0564e-05	3.73635	3.6713	2.08777e-05	3.79654	6.31988	7.17844e-06	3.79962
pmn001708	Asiatic acid	Terpenoids	6.2854	0.000225212	3.02134	4.78204	0.000275965	3.13323	6.81942	0.00021193	3.06166
Hmln003605	Myrianthic acid	Terpenoids	6.66855	3.76527e-06	2.34737	4.96041	5.08555e-06	2.44675	6.98463	3.08075e-06	2.39684
Lmsn011830	2α,19α-Dihydroxy-3-oxours-12-en-28-oic acid	Terpenoids	6.92898	9.6444e-06	1.06622	4.08218	1.62306e-05	1.09398	7.03349	8.68141e-06	1.08509
pmp000268	Rosamultic acid	Terpenoids	7.15372	7.8114e-05	1.86523	4.68527	9.20925e-05	1.92263	7.40722	7.61036e-05	1.88711
Smnp010489	3-O-cis-Coumaroyltormentic acid	Terpenoids	8.53799	3.04724e-05	1.11761	4.23665	5.18125e-05	1.14103	7.96035	3.06046e-05	1.13208
Hmhn007023	2α,3α,19α-Trihydroxyursolic acid	Terpenoids	9.12385	3.38657e-05	3.66092	7.24244	3.4683e-05	3.82818	9.96109	3.3752e-05	3.7103
Lmqp012453	Ursolaldehyde	Terpenoids	9.32938	0.000776206	1.20345	7.66015	0.000787092	1.26533	17.0578	0.000771291	1.22336
